# Supplementary material for: Diastereodivergent electrophilic trapping of α-boryl lithium derivatives
Source: publisher site journal article supplement (doi:10.3762/bjoc.22.68), 2026-06-05
Supplement: Additional file 1 [file 1860-5397-22-68-S1.pdf]

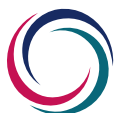

## Supporting Information

for

### Diastereodivergent electrophilic trapping of $\alpha$ -boryl lithium derivatives

Tereza Pavlíčková, Noam Orbach and Ilan Marek

*Beilstein J. Org. Chem.* **2026**, 22, 882–887. doi:10.3762/bjoc.22.68

### Experimental section, characterization data and copies of spectra

---

## Table of contents

|     |                                                                 |     |
|-----|-----------------------------------------------------------------|-----|
| 1.  | General information .....                                       | S2  |
| 2.  | Synthesis of starting materials .....                           | S3  |
| 1.1 | Compounds <b>5a</b> , <b>5e</b> , <b>5f</b> and <b>5h</b> ..... | S3  |
| 1.2 | Compounds <b>5b</b> and <b>5c</b> .....                         | S3  |
| 1.3 | Compounds <b>5d</b> and <b>5g</b> .....                         | S5  |
| 1.4 | Compound <b>5i</b> .....                                        | S8  |
| 3.  | Scope of ring opening/silylation .....                          | S9  |
| 4.  | Determination of the stereochemical outcome .....               | S18 |
| 5.  | NMR spectra .....                                               | S21 |
| 6.  | References .....                                                | S84 |

---

## 1. General information

Air- and moisture-sensitive reactions were conducted in flame-dried glassware under a positive pressure of argon. Solvents were dried via distillation according to standard procedures ( $\text{CH}_2\text{Cl}_2$ ,  $\text{Et}_3\text{N}$ ) or used from a solvent purification system (THF,  $\text{Et}_2\text{O}$ ; Pure-Solv.<sup>®</sup> Purification System) and stored at least 72 hours over activated 4 Å molecular sieves before usage. Commercially available reagents were used as purchased unless otherwise stated. Commercially available organolithium reagents were titrated twice against *N*-benzylbenzamide before usage. Thin-layer chromatography (TLC) was conducted with E. Merck silica gel 60 F254 pre-coated plates (0.25 mm) and visualized by exposure to UV light (254 nm) or stained with acidic *p*-anisaldehyde, cerium molybdate, or potassium permanganate solutions. Column chromatography was performed using Fluka silica gel 60 Å (40–63 mm, 230–400 mesh). PE (60–80 °C boiling range) was used for chromatographic separations. NMR spectra were recorded in  $\text{CDCl}_3$  on a Bruker Avance instrument.  $^1\text{H}$  NMR chemical shifts are provided using TMS as external standard (internal reference at  $\delta = 7.26$  ppm) and are reported as follows: chemical shift in ppm [multiplicity, coupling constant(s)  $J$  in Hz, integral]. The following abbreviations were used for peak multiplicities: br = broad, m = multiplet, s = singlet, d = doublet, t = triplet, q = quadruplet, quint = quintuplet, sext = sextuplet, sept = septuplet or combinations thereof. Carbon ( $^{13}\text{C}$ , APT) chemical shifts are referenced against the residual central solvent peak ( $\delta = 77.16$  ppm for  $\text{CDCl}_3$ ) and are given in ppm. Boron ( $^{11}\text{B}$ ), fluorine ( $^{19}\text{F}$ ) and phosphorus ( $^{31}\text{P}$ ) shifts are given in ppm using external calibration. High-resolution mass spectrometry (HRMS) was carried out on a FTICR instrument at the Mass Spectrometry Unit of the Schulich Faculty of Chemistry at the Technion – Israel Institute of Technology. Diastereomeric ratios (dr) were determined either by crude  $^1\text{H}$  NMR (relaxation delay  $D1 = 6$  s) or by GC/FID analysis using an Agilent Technologies 7820A GC with an Agilent Technologies 19091J-413 (30 m × 0.3 mm) column.

## 2. Synthesis of starting materials

Cyclopropyl iodides were prepared according to literature procedures.<sup>1-3</sup>

### 1.1 Compounds 5a, 5e, 5f and 5h

Compounds 5a, 5e, 5f, and 5h are known compounds; the experimental results were in agreement with the literature report.<sup>1</sup>

### 1.2 Compounds 5b and 5c

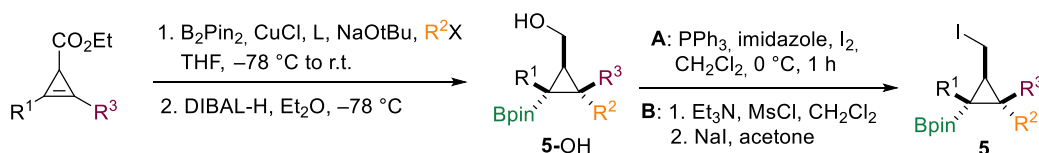

#### ((1S\*,2R\*,3S\*)-3-Allyl-2-methyl-2-(4,4,5,5-tetramethyl-1,3,2-dioxaborolan-2-yl)cyclopropyl)methanol (5b-OH)

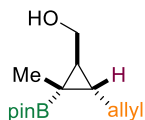

Chemical Formula: C<sub>11</sub>H<sub>20</sub>BO<sub>3</sub>  
Molecular Weight: 211,09

Prepared according to a literature procedure<sup>1,2</sup> from ethyl 2-methylcycloprop-2-ene-1-carboxylate (456 mg, 3.63 mmol).

**Yield:** 410 mg (1.63 mmol, 45% over two steps, dr >95:05 as determined by <sup>1</sup>H NMR spectroscopy) as a colorless oil.

**Rf** = 0.50 (PE/Et<sub>2</sub>O 1:1).

**<sup>1</sup>H NMR** (400 MHz, CDCl<sub>3</sub>) δ 5.81 (ddt, *J* = 16.4, 11.5, 5.9 Hz, 1H), 5.00 (dd, *J* = 17.2, 1.6 Hz, 1H), 4.92 (d, *J* = 10.3 Hz, 1H), 3.73 (dd, *J* = 11.4, 6.3 Hz, 1H), 3.53 (dd, *J* = 11.4, 8.6 Hz, 1H), 2.15 (hept, *J* = 8.3 Hz, 2H), 1.97 (s, 1H), 1.24 – 1.12 (m, 1H), 1.17 (s, 6H), 1.16 (s, 6H), 1.07 (s, 3H), 0.61 (q, *J* = 7.1 Hz, 1H) ppm.

**<sup>13</sup>C NMR** (101 MHz, CDCl<sub>3</sub>) δ 138.6, 114.3, 83.2, 62.5, 34.1, 31.6, 31.0, 25.1, 24.6, 15.8 ppm.

*Note:* Carbon atom attached to boron is not visible due to quadrupolar relaxation.

**<sup>11</sup>B NMR** (128 MHz, CDCl<sub>3</sub>): δ 33.1 ppm.

**HRMS** (TOF ESI+) *m/z*: calcd. for C<sub>14</sub>H<sub>25</sub>BO<sub>3</sub>Na<sup>+</sup> [*M*+Na]<sup>+</sup>: 275.1974, found: 275.1796.

**2-((1*R*\*,2*S*\*,3*S*\*)-2-Allyl-3-(iodomethyl)-1-methylcyclopropyl)-4,4,5,5-tetramethyl-1,3,2-dioxaborolane (5b)**

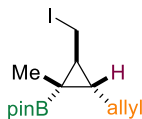

Chemical Formula: C<sub>14</sub>H<sub>24</sub>BIO<sub>2</sub>  
Molecular Weight: 362.06

Prepared according to a literature procedure **A**<sup>2</sup> from **5b**-OH (101 mg, 400 μmol).

**Yield:** 116 mg (320 μmol, 80%; dr >95:05 as determined by <sup>1</sup>H NMR spectroscopy using *p*-xylene as internal standard) as a colorless oil.

**<sup>1</sup>H NMR** (400 MHz, CDCl<sub>3</sub>) δ 5.87 (ddt, *J* = 16.4, 10.4, 6.0 Hz, 1H), 5.15 – 4.89 (m, 2H), 3.39 (dd, *J* = 9.7, 8.2 Hz, 1H), 3.28 – 3.19 (m, 1H), 2.37 – 2.24 (m, 1H), 2.21 – 2.10 (m, 1H), 1.53 (td, *J* = 8.2, 5.6 Hz, 1H), 1.22 (s, 6H), 1.20 (s, 6H), 1.11 (s, 3H), 0.66 (q, *J* = 6.6 Hz, 1H) ppm.

**<sup>13</sup>C NMR** (101 MHz, CDCl<sub>3</sub>) δ 138.2, 114.4, 83.3, 37.5, 34.0, 32.9, 25.1, 24.7, 14.9, 9.0 ppm.  
*Note:* Carbon atom attached to boron is not visible due to quadrupolar relaxation.

**<sup>11</sup>B NMR** (128 MHz, CDCl<sub>3</sub>): δ 33.3 ppm.

**HRMS** (TOF ESI+) *m/z*: calcd. for C<sub>14</sub>H<sub>24</sub>BIO<sub>2</sub><sup>+</sup> [*M*+*H*]<sup>+</sup>: 363.0993, found: 363.0997.

**((1*S*\*,2*R*\*,3*R*\*)-2,3-Dipropyl-2-(4,4,5,5-tetramethyl-1,3,2-dioxaborolan-2-yl)cyclopropyl)methanol (5c-OH)**

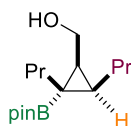

Chemical Formula: C<sub>16</sub>H<sub>31</sub>BO<sub>3</sub>  
Molecular Weight: 282,23

Prepared according to a literature procedure<sup>1,2</sup> from ethyl 2,3-dipropylcycloprop-2-ene-1-carboxylate (968 mg, 4.93 mmol).

**Yield:** 710 mg (2.51 mmol, 51% over two steps, dr >95:05 as determined by <sup>1</sup>H NMR spectroscopy) as a colorless oil.

**R<sub>f</sub>** = 0.40 (PE/Et<sub>2</sub>O 1:1).

**<sup>1</sup>H NMR** (400 MHz, CDCl<sub>3</sub>) δ 3.78 – 3.63 (m, 2H), 1.64 – 1.23 (m, 10H), 1.19 (s, 12H), 1.07 – 0.99 (m, 1H), 0.92 (t, *J* = 6.7 Hz, 3H), 0.89 (t, *J* = 6.7 Hz, 3H) ppm.

**<sup>13</sup>C NMR** (101 MHz, CDCl<sub>3</sub>) δ 83.0, 59.7, 27.2, 26.3, 25.9, 24.7, 24.7, 24.7, 23.6, 23.1, 15.0, 14.3 ppm.  
*Note:* Carbon atom attached to boron is not visible due to quadrupolar relaxation.

**<sup>11</sup>B NMR** (128 MHz, CDCl<sub>3</sub>): δ 33.2 ppm.

**HRMS** (APCI+) *m/z*: calcd. for C<sub>16</sub>H<sub>31</sub>BIO<sub>2</sub><sup>+</sup> [*M*-H<sub>2</sub>O+*H*]<sup>+</sup>: 265.2333, found: 265.2336.

**2-((1*R*\*,2*S*\*,3*R*\*)-2-(iodomethyl)-1,3-dipropylcyclopropyl)-4,4,5,5-tetramethyl-1,3,2-dioxaborolane (5c)**

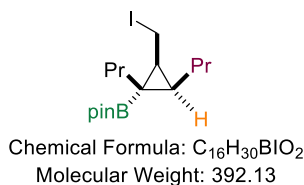

Prepared according to a literature procedure **B**<sup>3</sup> from **5c**-OH (141 mg, 500 μmol).

**Yield:** 196 mg (500 μmol, quantitative over two steps; dr >95:05 as determined by <sup>1</sup>H NMR spectroscopy using *p*-xylene as internal standard) as a colorless oil.

**<sup>1</sup>H NMR** (400 MHz, CDCl<sub>3</sub>) δ 3.42 (dd, *J* = 9.8, 6.5 Hz, 1H), 3.20 (t, *J* = 10.0 Hz, 1H), 1.63 (ddd, *J* = 10.2, 8.5, 6.5 Hz, 1H), 1.56 – 1.22 (m, 8H), 1.19 (s, 6H), 1.19 (s, 6H), 1.09 (dt, *J* = 8.6, 6.5 Hz, 1H), 0.94 (t, *J* = 6.9 Hz, 3H), 0.90 (t, *J* = 7.2 Hz, 3H) ppm.

**<sup>13</sup>C NMR** (101 MHz, CDCl<sub>3</sub>) δ 83.1, 28.1, 27.6, 26.6, 24.7, 24.6, 24.6, 23.5, 22.9, 14.9, 14.3, 5.7 ppm.  
*Note:* Carbon atom attached to boron is not visible due to quadrupolar relaxation.

**<sup>11</sup>B NMR** (128 MHz, CDCl<sub>3</sub>): δ 32.8 ppm.

**HRMS** (APCI+) *m/z*: calcd. for C<sub>16</sub>H<sub>31</sub>BIO<sub>2</sub><sup>+</sup> [*M*+*H*]<sup>+</sup>: 393.1456, found: 393.1479.

### 1.3 Compounds **5d** and **5g**

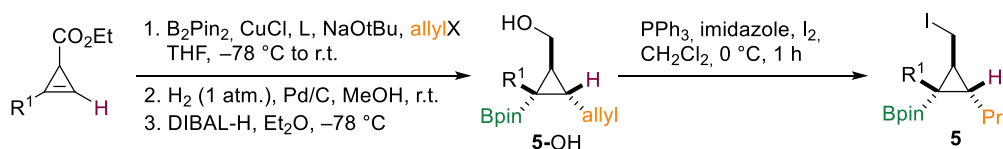

**Step 1:** Borylation was carried out according to a literature procedure and allyl phosphate as electrophile.<sup>1</sup>

**Step 2:** The above prepared pinacol borane was dissolved in MeOH (0.1 M) and Pd on charcoal (0.1 equiv w/w) was added. The mixture was stirred at room temperature under positive pressure of hydrogen (one balloon) for 4 h. The suspension was subsequently purged with argon, the solids were filtered and the mixture was concentrated under reduced pressure to give crude product.

**Step 3:** The crude ester was reduced according to a literature procedure.<sup>1,2</sup>

**((1*S*\*,2*R*\*,3*S*\*)-2,3-Dipropyl-2-(4,4,5,5-tetramethyl-1,3,2-dioxaborolan-2-yl)cyclopropyl)methanol (5d-OH)**

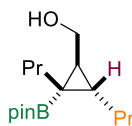

Chemical Formula: C<sub>16</sub>H<sub>31</sub>BO<sub>3</sub>  
Molecular Weight: 282,23

Prepared from ethyl 2-propylcycloprop-2-ene-1-carboxylate (342 mg, 2.22 mmol).

**Yield:** 345 mg (1.22 mmol, 52% over three steps, dr >95:05 as determined by <sup>1</sup>H NMR spectroscopy) as a white solid.

**R<sub>f</sub>** = 0.35 (PE/Et<sub>2</sub>O 1:1).

**<sup>1</sup>H NMR** (400 MHz, CDCl<sub>3</sub>) δ 3.74 – 3.58 (m, 2H), 1.55 – 1.45 (m, 1H), 1.35 (td, *J* = 16.7, 8.6 Hz, 8H), 1.22 (s, 6H), 1.19 (s, 6H), 1.17 – 1.09 (m, 1H), 0.88 (t, *J* = 7.6 Hz, 3H), 0.86 (t, *J* = 7.6 Hz, 3H), 0.59 (q, *J* = 6.4 Hz, 1H) ppm.

**<sup>13</sup>C NMR** (101 MHz, CDCl<sub>3</sub>) δ 83.1, 63.0, 34.1, 32.7, 31.7, 31.2, 25.2, 24.6, 23.4, 23.2, 14.8, 14.0 ppm.  
*Note:* Carbon atom attached to boron is not visible due to quadrupolar relaxation.

**<sup>11</sup>B NMR** (128 MHz, CDCl<sub>3</sub>): δ 33.1 ppm.

**HRMS** (APCI+) *m/z*: calcd. for C<sub>16</sub>H<sub>30</sub>BO<sub>2</sub><sup>+</sup> [*M*-H<sub>2</sub>O+H]<sup>+</sup>: 265.2333, found: 265.2323.

**2-((1*R*\*,2*S*\*,3*S*\*)-2-(Iodomethyl)-1,3-dipropylcyclopropyl)-4,4,5,5-tetramethyl-1,3,2-dioxaborolane (5d)**

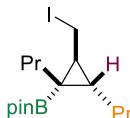

Chemical Formula: C<sub>16</sub>H<sub>30</sub>BO<sub>2</sub>  
Molecular Weight: 392.13

Prepared according to a literature procedure<sup>2</sup> from **5d-OH** (115 mg, 410 μmol).

**Yield:** 123 mg (315 μmol, 77%; dr >95:05 as determined by <sup>1</sup>H NMR spectroscopy using *p*-xylene as internal standard) as a colorless oil.

**<sup>1</sup>H NMR** (400 MHz, CDCl<sub>3</sub>) δ 3.44 (dd, *J* = 9.5, 6.5 Hz, 1H), 3.21 (t, *J* = 9.8 Hz, 1H), 2.09 (t, *J* = 7.1 Hz, 1H), 1.50 – 1.41 (m, 2H), 1.41 – 1.29 (m, 6H), 1.20 (s, 6H), 1.18 (s, 6H), 0.88 (t, *J* = 7.6 Hz, 3H), 0.86 (t, *J* = 7.3 Hz, 3H), 0.58 (q, *J* = 6.5 Hz, 1H) ppm.

**<sup>13</sup>C NMR** (101 MHz, CDCl<sub>3</sub>) δ 83.1, 37.3, 33.8, 33.6, 32.6, 25.2, 24.5, 23.3, 23.2, 14.7, 14.1, 10.4 ppm.  
*Note:* Carbon atom attached to boron is not visible due to quadrupolar relaxation.

**<sup>11</sup>B NMR** (128 MHz, CDCl<sub>3</sub>): δ 32.8 ppm.

**HRMS** (APCI+) *m/z*: calcd. for C<sub>16</sub>H<sub>31</sub>BO<sub>2</sub><sup>+</sup> [*M*+H]<sup>+</sup>: 393.1456, found: 393.1489.

**((1*S*\*,2*R*\*,3*S*\*)-2-Cyclohexyl-3-propyl-2-(4,4,5,5-tetramethyl-1,3,2-dioxaborolan-2-yl)cyclopropyl)methanol (5g-OH)**

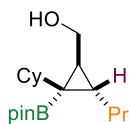

Chemical Formula: C<sub>19</sub>H<sub>35</sub>BO<sub>3</sub>  
Molecular Weight: 322,30

Prepared from ethyl 2-cyclohexylcycloprop-2-ene-1-carboxylate (971 mg, 5.00 mmol).

**Yield:** 451 mg (1.4 mmol, 28% over three steps, dr >95:05 as determined by <sup>1</sup>H NMR spectroscopy) as a white solid.

**R<sub>f</sub>** = 0.40 (PE/Et<sub>2</sub>O 1:2).

**<sup>1</sup>H NMR** (400 MHz, CDCl<sub>3</sub>) δ 3.70 (dd, *J* = 11.2, 7.7 Hz, 1H), 3.61 (dd, *J* = 11.3, 7.0 Hz, 1H), 1.89 (s, 1H), 1.71 (q, *J* = 7.5 Hz, 2H), 1.67 – 1.44 (m, 4H), 1.35 (ddd, *J* = 18.6, 13.4, 7.1 Hz, 4H), 1.30 – 1.02 (m, 5H), 1.19 (s, 6H), 1.16 (s, 6H), 0.86 (t, *J* = 6.9 Hz, 3H), 0.64 (ddd, *J* = 11.9, 8.3, 3.5 Hz, 1H), 0.52 (dt, *J* = 11.4, 5.5 Hz, 1H) ppm.

**<sup>13</sup>C NMR** (101 MHz, CDCl<sub>3</sub>) δ 82.8, 62.5, 41.9, 33.4, 32.6, 31.8, 31.6, 30.2, 27.4, 27.1, 26.6, 25.4, 24.4, 23.3, 14.0 ppm.

*Note:* Carbon atom attached to boron is not visible due to quadrupolar relaxation.

**<sup>11</sup>B NMR** (128 MHz, CDCl<sub>3</sub>): δ 32.7 ppm.

**HRMS** (APCI+) *m/z*: calcd. for C<sub>19</sub>H<sub>34</sub>BO<sub>2</sub><sup>+</sup> [*M*-H<sub>2</sub>O+H]<sup>+</sup>: 305.2655, found: 305.2646.

**2-((1*R*\*,2*S*\*,3*S*\*)-1-Cyclohexyl-2-(iodomethyl)-3-propylcyclopropyl)-4,4,5,5-tetramethyl-1,3,2-dioxaborolane (5g)**

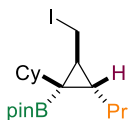

Chemical Formula: C<sub>19</sub>H<sub>34</sub>BIO<sub>2</sub>  
Molecular Weight: 432.19

Prepared according to a literature procedure<sup>2</sup> from **5g-OH** (121 mg, 375 μmol).

**Yield:** 121 mg (281 μmol, 75%; dr >95:05 as determined by <sup>1</sup>H NMR spectroscopy using *p*-xylene as internal standard) as a colorless oil.

**<sup>1</sup>H NMR** (400 MHz, CDCl<sub>3</sub>) δ 3.59 (dd, *J* = 9.5, 5.5 Hz, 1H), 3.26 – 3.16 (m, 1H), 1.84 – 1.60 (m, 5H), 1.55 (dq, *J* = 13.8, 7.0 Hz, 2H), 1.48 – 1.32 (m, 4H), 1.33 – 1.26 (m, 2H), 1.21 (s, 6H), 1.19 (s, 6H), 1.12 (t, *J* = 12.6 Hz, 3H), 0.90 (t, *J* = 7.1 Hz, 3H), 0.76 – 0.64 (m, 1H), 0.56 (q, *J* = 5.9 Hz, 1H) ppm.

**<sup>13</sup>C NMR** (101 MHz, CDCl<sub>3</sub>) δ 83.0, 42.3, 36.3, 33.7, 33.1, 33.1, 31.4, 27.4, 27.1, 26.5, 25.4, 24.5, 23.2, 14.2, 10.7 ppm.

*Note:* Carbon atom attached to boron is not visible due to quadrupolar relaxation.

**<sup>11</sup>B NMR** (128 MHz, CDCl<sub>3</sub>): δ 32.5 ppm.

**HRMS** (APCI+) *m/z*: calcd. for C<sub>19</sub>H<sub>34</sub>BO<sub>2</sub><sup>+</sup> [*M*-HI+H]<sup>+</sup>: 305.2646, found: 305.2641.

## 1.4 Compound 5i

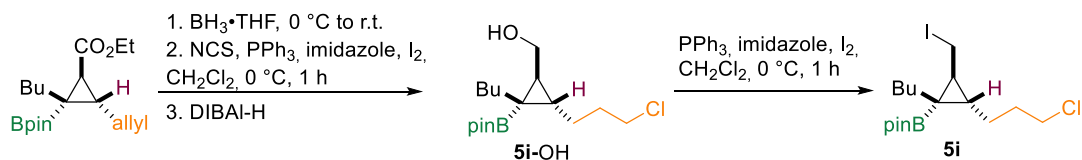

**((1*S*\*,2*R*\*,3*S*\*)-2-Butyl-3-(3-chloropropyl)-2-(4,4,5,5-tetramethyl-1,3,2-dioxaborolan-2-yl)cyclopropyl)methanol (5i-OH)**

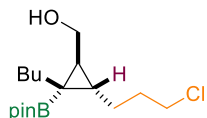

Chemical Formula:  $\text{C}_{17}\text{H}_{32}\text{BClO}_3$   
Molecular Weight: 330,70

**Step 1:** A flame-dried Schlenk flask was charged with a solution of pinacolborane **S1**<sup>1</sup> (336 mg, 1.00 mmol) in dry THF (5.0 mL) under argon atmosphere. The solution was cooled to 0 °C and  $\text{BH}_3 \cdot \text{THF}$  (1.5 mL, 1.0 M solution in THF) was added dropwise. The mixture was stirred for 1 h when TLC analysis indicated full consumption of **S1**. The mixture was quenched by a dropwise addition of MeOH at 0 °C, until the evolution of hydrogen gas ceased. Sodium perborate (1.09 g, 4.00 mmol) was added, followed by a dropwise addition of water (1.0 mL) at 0 °C and the mixture was stirred for 1 h at this temperature.  $\text{Na}_2\text{SO}_3$  satd. solution (10 mL) was added, the layers were separated and the aqueous one was extracted with EtOAc (3 × 10 mL). The organic layers were washed with brine, dried over  $\text{Na}_2\text{SO}_4$ , filtered, the filtrate was concentrated under reduced pressure and the crude residue was purified by silica gel column chromatography (PE/EtOAc 99:1 to 7:3) to give the desired alcohol.

**Step 2:** A solution of  $\text{PPh}_3$  (249 mg, 948  $\mu\text{mol}$ ) and *N*-chlorosuccinimide (116 mg, 869  $\mu\text{mol}$ ) in dry DCM (5 mL) was stirred for 30 min, then cooled to 0 °C and imidazole (11 mg, 157  $\mu\text{mol}$ ) was added. A solution of the above prepared ester in dry DCM (2 mL) was added dropwise, the mixture was stirred for 2 h at 0 °C and then overnight at room temperature. It was diluted with PE (20 mL), filtered over a short plug of silica gel and washed with 5%  $\text{Et}_2\text{O}$  in PE. The volatiles were removed under reduced pressure and the crude residue was used in the next step without further purification.

**Step 3:** The ester was reduced according to a literature procedure.<sup>1,2</sup>

**Yield:** 100 mg (302  $\mu\text{mol}$ , 30% over three steps, dr >95:05 as determined by  $^1\text{H}$  NMR spectroscopy) as a colorless oil.

**Rf** = 0.65 (PE/ $\text{Et}_2\text{O}$  1:1).

**$^1\text{H}$  NMR** (400 MHz,  $\text{CDCl}_3$ )  $\delta$  3.75 – 3.58 (m, 2H), 3.54 (t,  $J$  = 6.7 Hz, 2H), 1.81 (hept,  $J$  = 7.3 Hz, 2H), 1.65 – 1.52 (m, 2H), 1.52 – 1.40 (m, 1H), 1.37 – 1.11 (m, 6H), 1.21 (s, 6H), 1.17 (s, 6H), 0.86 (t,  $J$  = 6.9 Hz, 3H), 0.58 (q,  $J$  = 7.1 Hz, 1H) ppm.

**$^{13}\text{C}$  NMR** (101 MHz,  $\text{CDCl}_3$ )  $\delta$  83.2, 62.7, 45.0, 33.2, 32.3, 31.6, 31.2, 30.3, 28.0, 25.2, 24.6, 23.2, 14.2 ppm.

*Note:* Carbon atom attached to boron is not visible due to quadrupolar relaxation.

**$^{11}\text{B}$  NMR** (128 MHz,  $\text{CDCl}_3$ ):  $\delta$  32.9 ppm.

**HRMS** (TOF ESI+)  $m/z$ : calcd. for  $\text{C}_{17}\text{H}_{33}\text{BClNaO}_3^+$  [ $M+\text{Na}$ ]<sup>+</sup>: 353.2031, found: 353.2025.

## 2-((1*R*\*,2*S*\*,3*S*\*)-1-Butyl-2-(3-chloropropyl)-3-(iodomethyl)cyclopropyl)-4,4,5,5-tetramethyl-1,3,2-dioxaborolane (**5i**)

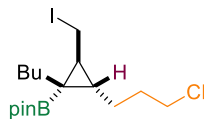

Chemical Formula: C<sub>17</sub>H<sub>31</sub>BClO<sub>2</sub>  
Molecular Weight: 440.60

Prepared according to a literature procedure<sup>2</sup> from **5i**-OH (100 mg, 302 μmol).

**Yield:** 79 mg (180 μmol, 60%; *dr* > 95:05 as determined by <sup>1</sup>H NMR spectroscopy using *p*-xylene as internal standard) as a colorless oil.

**<sup>1</sup>H NMR** (400 MHz, CDCl<sub>3</sub>) δ 3.62 – 3.52 (m, 2H), 3.49 (dd, *J* = 9.6, 6.1 Hz, 1H), 3.19 (t, *J* = 10.0 Hz, 1H), 1.99 – 1.76 (m, 2H), 1.70 – 1.54 (m, 2H), 1.55 – 1.44 (m, 2H), 1.39 – 1.23 (m, 5H), 1.23 (s, 6H), 1.21 (s, 6H), 0.88 (t, *J* = 6.9 Hz, 3H), 0.59 (td, *J* = 7.2, 5.5 Hz, 1H) ppm.

**<sup>13</sup>C NMR** (101 MHz, CDCl<sub>3</sub>) δ 83.3, 45.1, 36.1, 33.5, 32.9, 32.4, 31.1, 27.8, 25.2, 24.6, 23.2, 14.2, 9.9 ppm.  
*Note:* Carbon atom attached to boron is not visible due to quadrupolar relaxation.

**<sup>11</sup>B NMR** (128 MHz, CDCl<sub>3</sub>): δ 32.9 ppm.

**HRMS** (APCI+) *m/z*: calcd. for C<sub>17</sub>H<sub>32</sub>BClO<sub>2</sub><sup>+</sup> [*M*+*H*]<sup>+</sup>: 441.1229, found: 441.1238.

### 3. Scope of ring opening/silylation

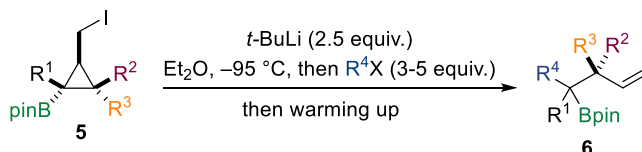

**General procedure for Li-halogen exchange-mediated ring opening/silylation (GP1):**<sup>3</sup> A flame-dried Schlenk flask was charged with dry Et<sub>2</sub>O (0.2 M with respect to **5**, typically 1 mL) under argon and a solution of *t*-BuLi (2.5 equiv, typically 1.4 M in pentane, freshly titrated before use against *N*-benzyl benzamide)<sup>4</sup> was added at -78 °C. The mixture was cooled to -95 °C with good stirring and a solution of iodide **5** (typically 200 μmol) in dry Et<sub>2</sub>O (0.2 M) was added via a cannula. A bright yellow precipitate formed. Electrophile (3–5 equiv) was added and the mixture was stirred with warming up to the required temperature while monitored by TLC against the proton-quench product (*R*<sub>f</sub> ≈ 0.45 vs. 0.70 for silylated compounds **6**). Completion was accompanied by decoloration and was typically reached after 30–40 min of stirring at -30 °C. The reaction mixture was subsequently quenched with MeOH (10 equiv), diluted with Et<sub>2</sub>O and filtered over a short plug of silica gel. The crude residue was purified by flash column chromatography (silica gel, gradient PE/Et<sub>2</sub>O 999:1 to 99:1; majority of compounds elute at 997:3) to obtain title compounds **6**.

**Trimethyl((2*R*\*,3*R*\*)-3-methyl-2-(4,4,5,5-tetramethyl-1,3,2-dioxaborolan-2-yl)pent-4-en-2-yl)silane (6a)**

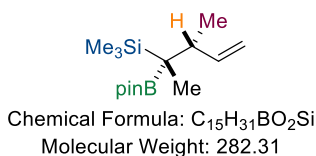

Prepared according to general procedure **GP1** from **5a** (67 mg, 200 μmol) and Me<sub>3</sub>SiCl (63 μL, 500 μmol).

**Yield:** 40 mg (142 μmol, 71%, dr >95:05 as determined by <sup>1</sup>H NMR spectroscopy) as a colorless oil.

**R<sub>f</sub>** = 0.65 (PE/Et<sub>2</sub>O 40:1).

**<sup>1</sup>H NMR** (400 MHz, CDCl<sub>3</sub>) δ 5.84 (ddd, *J* = 17.1, 10.1, 9.1 Hz, 1H), 4.95 (dd, *J* = 17.1, 1.4 Hz, 1H), 4.89 (dd, *J* = 10.1, 2.0 Hz, 1H), 2.61 – 2.50 (m, 1H), 1.23 (s, 12H), 1.04 (d, *J* = 6.9 Hz, 3H), 0.97 (s, 3H), 0.03 (s, 9H) ppm.

**<sup>13</sup>C NMR** (101 MHz, CDCl<sub>3</sub>) δ 143.6, 113.0, 82.9, 41.3, 25.4, 25.3, 19.7, 11.8, -1.6 ppm.  
*Note:* Carbon atom attached to boron is not visible due to quadrupolar relaxation.

**<sup>29</sup>Si NMR** (80 MHz, CDCl<sub>3</sub>) δ 4.6 ppm.

**<sup>11</sup>B NMR** (128 MHz, CDCl<sub>3</sub>): δ 34.5 ppm.

**HRMS** (APCI+) *m/z*: calcd. for C<sub>15</sub>H<sub>32</sub>BO<sub>2</sub>Si<sup>+</sup> [*M*+*H*]<sup>+</sup>: 283.2259, found: 283.2254.

**Trimethyl((2*R*\*,3*R*\*)-3-methyl-2-(4,4,5,5-tetramethyl-1,3,2-dioxaborolan-2-yl)pent-4-en-2-yl)silane (6b)**

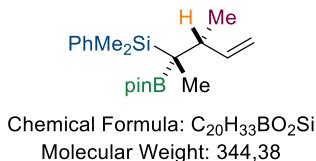

Prepared according to general procedure **GP1** from **5a** (61 mg, 180 μmol) and Me<sub>2</sub>PhSiCl (92 μL, 540 μmol).

**Yield:** 38 mg (110 μmol, 61%, dr >95:05 as determined by <sup>1</sup>H NMR spectroscopy) as a colorless oil.

**R<sub>f</sub>** = 0.45 (PE/Et<sub>2</sub>O 40:1).

**<sup>1</sup>H NMR** (400 MHz, CDCl<sub>3</sub>) δ 7.59 (m, 2H), 7.36 – 7.26 (m, 3H), 5.79 (ddd, *J* = 17.2, 10.0, 8.9 Hz, 1H), 5.00 – 4.74 (m, 2H), 2.56 (p, *J* = 7.0 Hz, 1H), 1.19 (s, 6H), 1.09 (s, 6H), 1.09 (s, 3H), 1.03 (d, *J* = 6.9 Hz, 3H), 0.39 (s, 3H), 0.33 (s, 3H) ppm.

**<sup>13</sup>C NMR** (101 MHz, CDCl<sub>3</sub>) δ 143.1, 139.1, 135.1, 128.7, 127.3, 113.5, 83.0, 41.2, 25.4, 25.2, 19.5, 12.4, -2.6, -3.0 ppm.  
*Note:* Carbon atom attached to boron is not visible due to quadrupolar relaxation.

**<sup>29</sup>Si NMR** (80 MHz, CDCl<sub>3</sub>) δ -0.8 ppm.

**<sup>11</sup>B NMR** (128 MHz, CDCl<sub>3</sub>): δ 34.5 ppm.

**HRMS** (APCI+) *m/z*: calcd. for C<sub>20</sub>H<sub>34</sub>BO<sub>2</sub>Si<sup>+</sup> [*M*+*H*]<sup>+</sup>: 345.2416, found: 345.2415.

**Trimethyl((2*S*\*,3*S*\*)-2-(4,4,5,5-tetramethyl-1,3,2-dioxaborolan-2-yl)-3-vinylhex-5-en-2-yl)silane (6c)**

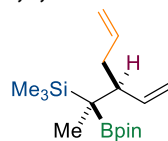

Chemical Formula: C<sub>17</sub>H<sub>33</sub>BO<sub>2</sub>Si

Molecular Weight: 308.34

Prepared according to general procedure **GP1** from **5b** (116 mg, 320 μmol) and Me<sub>3</sub>SiCl (203 μL, 1.6 mmol).

**Yield:** 55 mg (178 μmol, 56%, *dr* >95:05 as determined by <sup>1</sup>H NMR spectroscopy) as a colorless oil.

**R<sub>f</sub>** = 0.60 (PE/Et<sub>2</sub>O 40:1).

**<sup>1</sup>H NMR** (400 MHz, CDCl<sub>3</sub>) δ 5.81 – 5.69 (m, 1H), 5.65 (dt, *J* = 17.1, 9.9 Hz, 1H), 4.99 (dd, *J* = 10.2, 2.2 Hz, 1H), 4.96 – 4.86 (m, 3H), 2.40 (td, *J* = 10.7, 2.6 Hz, 1H), 2.21 (td, *J* = 12.4, 7.0 Hz, 1H), 2.01 (ddt, *J* = 13.6, 7.1, 1.3 Hz, 1H), 1.24 (s, 12H), 1.01 (s, 3H), 0.02 (s, 9H) ppm.

**<sup>13</sup>C NMR** (101 MHz, CDCl<sub>3</sub>) δ 140.4, 138.6, 115.4, 114.8, 83.0, 47.7, 38.6, 25.4, 11.7, -1.6 ppm.

*Note:* Carbon atom attached to boron is not visible due to quadrupolar relaxation.

**<sup>29</sup>Si NMR** (80 MHz, CDCl<sub>3</sub>) δ 4.4 ppm.

**<sup>11</sup>B NMR** (128 MHz, CDCl<sub>3</sub>): δ 34.5 ppm.

**HRMS** (APCI+) *m/z*: calcd. for C<sub>17</sub>H<sub>33</sub>BO<sub>2</sub>Si<sup>+</sup> [*M*+H]<sup>+</sup>: 309.2422, found: 309.2421.

**Trimethyl((4*R*\*,5*R*\*)-4-(4,4,5,5-tetramethyl-1,3,2-dioxaborolan-2-yl)-5-vinyl-octan-4-yl)silane (6d)**

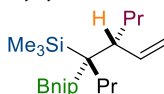

Chemical Formula: C<sub>19</sub>H<sub>39</sub>BO<sub>2</sub>Si

Molecular Weight: 338.41

Prepared according to general procedure **GP1** from **5c** (141 mg, 360 μmol) and Me<sub>3</sub>SiCl (137 μL, 1.1 mmol).

**Yield:** 62 mg (183 μmol, 51%) as a partially separable mixture of diastereomers (*dr* 80:20 as determined by <sup>1</sup>H NMR spectroscopy) as a colorless oil.

Prepared according to general procedure **GP1** from **5d** (118 mg, 300 μmol) and Me<sub>3</sub>SiCl (190 μL, 1.5 mmol).

**Yield:** 45 mg (133 μmol, 44%) as a partially separable mixture of diastereomers (*dr* 80:20 as determined by <sup>1</sup>H NMR spectroscopy) as a colorless oil.

**R<sub>f</sub>** = 0.65 (PE/Et<sub>2</sub>O 40:1).

*Major diastereomer:*

**<sup>1</sup>H NMR** (400 MHz, CDCl<sub>3</sub>) δ 5.73 (dt, *J* = 17.1, 10.0 Hz, 1H), 4.97 (dd, *J* = 10.2, 2.3 Hz, 1H), 4.89 (dd, *J* = 17.1, 2.3 Hz, 1H), 2.41 – 2.24 (m, 1H), 1.63 – 1.34 (m, 6H), 1.23 – 1.21 (m, 1H), 1.22 (s, 6H), 1.21 (s, 6H), 1.16 – 1.02 (m, 1H), 0.88 – 0.83 (m, 6H), 0.06 (s, 9H) ppm.

**<sup>13</sup>C NMR** (101 MHz, CDCl<sub>3</sub>) δ 143.0, 114.8, 82.5, 46.3, 33.7, 32.4, 25.6, 25.2, 21.07, 20.5, 15.5, 14.3, 0.8 ppm.

*Note:* Carbon atom attached to boron is not visible due to quadrupolar relaxation.

**<sup>29</sup>Si NMR** (80 MHz, CDCl<sub>3</sub>) δ 4.0 ppm.

*Minor diastereomer:*

**<sup>1</sup>H NMR** (400 MHz, CDCl<sub>3</sub>) δ 5.92 (dt, *J* = 17.1, 10.1 Hz, 1H), 4.97 (dd, *J* = 10.2, 2.3 Hz, 1H), 4.93 – 4.82 (m, 1H), 2.41 – 2.24 (m, 1H), 1.63 – 1.34 (m, 6H), 1.23 – 1.21 (m, 1H), 1.21 (s, 6H), 1.20 (s, 6H), 1.16 – 1.02 (m, 1H), 0.88 – 0.83 (m, 6H), 0.07 (s, 9H) ppm.

**<sup>13</sup>C NMR** (101 MHz, CDCl<sub>3</sub>) δ 141.9, 114.7, 82.5, 46.6, 36.4, 32.3, 25.4, 25.2, 21.6, 21.12, 15.6, 14.2, 0.4 ppm.

*Note:* Carbon atom attached to boron is not visible due to quadrupolar relaxation.

**<sup>29</sup>Si NMR** (80 MHz, CDCl<sub>3</sub>) δ 4.2 ppm.

**<sup>11</sup>B NMR** (128 MHz, CDCl<sub>3</sub>): δ 34.4 ppm.

**HRMS** (APCI+) *m/z*: calcd. for C<sub>19</sub>H<sub>40</sub>BO<sub>2</sub>Si<sup>+</sup> [*M*+H]<sup>+</sup>: 339.2885, found: 339.2884.

**((3*R*\*,4*R*\*)-4-Ethyl-3-(4,4,5,5-tetramethyl-1,3,2-dioxaborolan-2-yl)hex-5-en-3-yl)trimethylsilane (6e)**

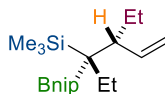

Chemical Formula: C<sub>17</sub>H<sub>35</sub>BO<sub>2</sub>Si  
Molecular Weight: 310,36

Prepared according to general procedure **GP1** from **5b** (100 mg, 275 μmol) and Me<sub>3</sub>SiI (174 μL, 1.37 mmol).

**Yield:** 42 mg (137 μmol, 49%) as an inseparable mixture of diastereomers (dr 87:13 as determined by <sup>1</sup>H NMR spectroscopy) as a colorless oil.

**R<sub>f</sub>** = 0.65 (PE/Et<sub>2</sub>O 40:1).

*Major diastereomer:*

**<sup>1</sup>H NMR** (400 MHz, CDCl<sub>3</sub>) δ 5.69 (dt, *J* = 17.1, 10.0 Hz, 1H), 5.00 (dd, *J* = 10.2, 2.3 Hz, 1H), 4.92 (dd, *J* = 17.1, 2.3 Hz, 1H), 2.22 – 2.12 (m, 1H), 1.72 (dq, *J* = 14.9, 7.5 Hz, 1H), 1.64 – 1.53 (m, 1H), 1.50 (ddd, *J* = 13.5, 6.9, 3.8 Hz, 1H), 1.38 (tdd, *J* = 14.7, 7.9, 2.9 Hz, 1H), 1.22 (s, 6H), 1.22 (s, 6H), 0.97 (t, *J* = 7.5 Hz, 3H), 0.81 (t, *J* = 7.3 Hz, 3H), 0.07 (s, 9H) ppm.

**<sup>13</sup>C NMR** (101 MHz, CDCl<sub>3</sub>) δ 141.4, 115.1, 82.6, 48.8, 26.8, 25.4, 25.2, 22.2, 13.2, 12.7, 0.3 ppm.

*Note:* Carbon atom attached to boron is not visible due to quadrupolar relaxation.

**<sup>29</sup>Si NMR** (80 MHz, CDCl<sub>3</sub>) δ 3.9 ppm.

*Minor diastereomer:*

**<sup>1</sup>H NMR** (400 MHz, CDCl<sub>3</sub>) δ 5.90 (dt, *J* = 17.1, 10.0 Hz, 1H), 5.03 – 4.88 (m, 2H), 2.19 – 2.09 (m, 1H), 1.72 (dq, *J* = 14.9, 7.5 Hz, 1H), 1.64 – 1.45 (m, 2H), 1.45 – 1.31 (m, 1H), 1.22 (s, 6H), 1.20 (s, 6H), 0.92 (t, *J* = 7.5 Hz, 3H), 0.79 (t, *J* = 1.9 Hz, 3H), 0.02 (s, 9H) ppm.

**<sup>13</sup>C NMR** (101 MHz, CDCl<sub>3</sub>) δ 142.4, 115.1, 82.5, 48.4, 26.8, 25.6, 25.3, 22.3, 12.8, 12.1, 0.7 ppm.

*Note:* Carbon atom attached to boron is not visible due to quadrupolar relaxation.

<sup>29</sup>Si NMR (80 MHz, CDCl<sub>3</sub>) δ 4.2 ppm.

<sup>11</sup>B NMR (128 MHz, CDCl<sub>3</sub>): δ 34.4 ppm.

HRMS (APCI+) m/z: calcd. for C<sub>17</sub>H<sub>36</sub>BO<sub>2</sub>Si<sup>+</sup> [M+H]<sup>+</sup>: 311.2572, found: 311.2578.

**Trimethyl((4*S*\*,5*S*\*)-5-(4,4,5,5-tetramethyl-1,3,2-dioxaborolan-2-yl)-4-vinylnon-1-en-5-yl)silane (6f)**

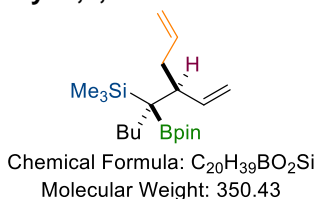

Prepared according to general procedure **GP1** from **5f** (101 mg, 250 μmol) and Me<sub>3</sub>SiCl (159 μL, 1.25 mmol).

**Yield:** 60 mg (173 μmol, 69%) as a partially separable mixture of diastereomers (dr 75:25 as determined by <sup>1</sup>H NMR spectroscopy) as a colorless oil.

**R<sub>f</sub>** = 0.70 (PE/Et<sub>2</sub>O 40:1).

*Major diastereomer:*

<sup>1</sup>H NMR (400 MHz, CDCl<sub>3</sub>) δ 5.84 – 5.65 (m, 2H), 5.04 – 4.84 (m, 4H), 2.49 – 2.25 (m, 2H), 2.21 – 2.09 (m, 1H), 1.66 – 1.55 (m, 1H), 1.54 – 1.44 (m, 2H), 1.40 – 1.29 (m, 3H), 1.22 (s, 12H), 0.88 (t, *J* = 7.1 Hz, 3H), 0.08 (s, 9H) ppm.

<sup>13</sup>C NMR (101 MHz, CDCl<sub>3</sub>) δ 141.0, 139.2, 115.2, 114.5, 82.6, 47.0, 38.6, 29.8, 29.6, 25.4, 25.2, 24.2, 14.4, 0.4 ppm.

*Note:* Carbon atom attached to boron is not visible due to quadrupolar relaxation.

<sup>29</sup>Si NMR (80 MHz, CDCl<sub>3</sub>) δ 4.1 ppm.

*Minor diastereomer:*

<sup>1</sup>H NMR (400 MHz, CDCl<sub>3</sub>) δ 5.96 (dt, *J* = 17.1, 10.0 Hz, 1H), 5.84 – 5.65 (m, 1H), 5.04 – 4.84 (m, 4H), 2.49 – 2.25 (m, 2H), 2.02 (td, *J* = 12.7, 7.0 Hz, 1H), 1.66 – 1.55 (m, 2H), 1.54 – 1.44 (m, 1H), 1.40 – 1.29 (m, 3H), 1.22 (s, 6H), 1.21 (s, 6H), 0.89 (t, *J* = 7.1 Hz, 3H), 0.08 (s, 9H) ppm.

<sup>13</sup>C NMR (101 MHz, CDCl<sub>3</sub>) δ 142.2, 139.1, 115.3, 114.7, 82.6, 46.9, 36.3, 29.7, 29.3, 25.5, 25.2, 24.1, 14.4, 0.7 ppm.

*Note:* Carbon atom attached to boron is not visible due to quadrupolar relaxation.

<sup>29</sup>Si NMR (80 MHz, CDCl<sub>3</sub>) δ 4.3 ppm.

<sup>11</sup>B NMR (128 MHz, CDCl<sub>3</sub>): δ 34.4 ppm.

HRMS (APCI+) m/z: calcd. for C<sub>20</sub>H<sub>40</sub>BO<sub>2</sub>Si<sup>+</sup> [M+H]<sup>+</sup>: 351.2885, found: 351.2903.

**((1*S*\*,2*S*\*)-1-Cyclohexyl-1-(4,4,5,5-tetramethyl-1,3,2-dioxaborolan-2-yl)-2-vinylpentyl)trimethylsilane (6g)**

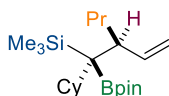

Chemical Formula: C<sub>22</sub>H<sub>43</sub>BO<sub>2</sub>Si

Molecular Weight: 378.48

Prepared according to general procedure **GP1** from **5g** (121 mg, 281  $\mu$ mol) and Me<sub>3</sub>Sil (120  $\mu$ L, 843  $\mu$ mol).

**Yield:** 40 mg (106  $\mu$ mol, 38%) as a partially separable mixture of diastereomers (dr 75:25 as determined by <sup>1</sup>H NMR spectroscopy) as a colorless oil.

**R<sub>f</sub>** = 0.45 (PE/Et<sub>2</sub>O 40:1).

*Major diastereomer:*

**<sup>1</sup>H NMR** (400 MHz, CDCl<sub>3</sub>)  $\delta$  5.86 (dt, *J* = 17.0, 10.1 Hz, 1H), 4.96 – 4.80 (m, 2H), 2.44 (t, *J* = 10.5 Hz, 1H), 1.85 – 1.64 (m, 4H), 1.63 – 1.46 (m, 6H), 1.39 – 1.07 (m, 5H), 1.22 (s, 6H), 1.21 (s, 6H), 0.86 (t, *J* = 7.2 Hz, 3H), 0.13 (s, 9H) ppm.

**<sup>13</sup>C NMR** (101 MHz, CDCl<sub>3</sub>)  $\delta$  144.3, 114.5, 82.5, 46.7, 42.5, 36.3, 32.8, 31.9, 28.2, 28.0, 26.7, 25.7, 25.3, 21.3, 14.3, 2.7 ppm.

*Note:* Carbon atom attached to boron is not visible due to quadrupolar relaxation.

**<sup>29</sup>Si NMR** (80 MHz, CDCl<sub>3</sub>)  $\delta$  3.9 ppm.

*Minor diastereomer:*

**<sup>1</sup>H NMR** (400 MHz, CDCl<sub>3</sub>)  $\delta$  5.96 (dt, *J* = 17.3, 9.9 Hz, 1H), 4.96 – 4.80 (m, 2H), 2.28 (t, *J* = 10.1 Hz, 1H), 1.85 – 1.64 (m, 4H), 1.63 – 1.46 (m, 6H), 1.39 – 1.07 (m, 5H), 1.24 (s, 6H), 1.22 (s, 6H), 0.85 (t, *J* = 7.2 Hz, 3H), 0.12 (s, 9H) ppm.

**<sup>13</sup>C NMR** (101 MHz, CDCl<sub>3</sub>)  $\delta$  145.1, 113.6, 82.5, 46.3, 42.7, 36.4, 33.4, 30.9, 28.3, 27.8, 26.7, 25.8, 25.6, 21.6, 14.2, 2.0 ppm.

*Note:* Carbon atom attached to boron is not visible due to quadrupolar relaxation.

**<sup>29</sup>Si NMR** (80 MHz, CDCl<sub>3</sub>)  $\delta$  5.5 ppm.

**<sup>11</sup>B NMR** (128 MHz, CDCl<sub>3</sub>):  $\delta$  33.6 ppm.

**HRMS** (APCI+) *m/z*: calcd. for C<sub>22</sub>H<sub>44</sub>BO<sub>2</sub>Si<sup>+</sup> [*M*+H]<sup>+</sup>: 379.3198, found: 378.3199.

**Trimethyl((2*S*,3*S*)-3-methyl-2-(4,4,5,5-tetramethyl-1,3,2-dioxaborolan-2-yl)-3-vinylhex-5-en-2-yl)silane (6h)**

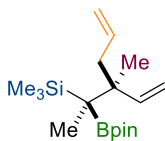

Chemical Formula: C<sub>18</sub>H<sub>35</sub>BO<sub>2</sub>Si  
Molecular Weight: 322.37

Prepared according to general procedure **GP1** from **5h** (41 mg, 110 μmol) and Me<sub>3</sub>SiCl (70 μL, 550 μmol).

**Yield:** 12 mg (37 μmol, 34%) as an inseparable mixture of diastereomers (dr 90:10 as determined by <sup>1</sup>H NMR spectroscopy) as a colorless oil.

**R<sub>f</sub>** = 0.35 (PE/Et<sub>2</sub>O 40:1).

*Major diastereomer:*

**<sup>1</sup>H NMR** (400 MHz, CDCl<sub>3</sub>) δ 5.84 (dd, *J* = 17.5, 10.8 Hz, 1H), 5.74 – 5.58 (m, 1H), 5.06 – 4.88 (m, 3H), 4.80 (dd, *J* = 17.5, 1.5 Hz, 1H), 2.68 (dd, *J* = 13.6, 5.7 Hz, 1H), 2.12 (dd, *J* = 13.6, 8.5 Hz, 1H), 1.23 (s, 12H), 1.03 (s, 3H), 1.02 (s, 3H), 0.09 (s, 9H) ppm.

**<sup>13</sup>C NMR** (101 MHz, CDCl<sub>3</sub>) δ 145.8, 137.1, 116.0, 112.2, 82.9, 44.3, 29.9, 25.6, 25.2, 20.5, 14.2, 1.1 ppm.  
*Note:* Carbon atom attached to boron is not visible due to quadrupolar relaxation.

**<sup>29</sup>Si NMR** (80 MHz, CDCl<sub>3</sub>) δ 3.7 ppm.

*Minor diastereomer:*

**<sup>1</sup>H NMR** (400 MHz, CDCl<sub>3</sub>) δ 6.06 (dd, *J* = 16.6, 10.6 Hz, 1H), 5.74 – 5.58 (m, 1H), 5.24 – 5.07 (m, 1H), 5.06 – 4.88 (m, 2H), 4.82 (dd, *J* = 17.6, 1.5 Hz, 1H), 2.37 (dd, *J* = 13.4, 8.7 Hz, 1H), 2.12 (dd, *J* = 13.6, 8.5 Hz, 1H), 1.25 (s, 12H), 1.02 (s, 3H), 1.01 (s, 3H), 0.08 (s, 9H) ppm.

**<sup>13</sup>C NMR** (101 MHz, CDCl<sub>3</sub>) δ 146.6, 136.9, 116.0, 111.9, 82.9, 44.5, 29.9, 25.6, 25.2, 20.2, 14.3, 1.0 ppm.  
*Note:* Carbon atom attached to boron is not visible due to quadrupolar relaxation.

**<sup>29</sup>Si NMR** (80 MHz, CDCl<sub>3</sub>) δ 3.3 ppm.

**<sup>11</sup>B NMR** (128 MHz, CDCl<sub>3</sub>): δ 34.3 ppm.

**HRMS** (APCI+) *m/z*: calcd. for C<sub>18</sub>H<sub>36</sub>BO<sub>2</sub>Si<sup>+</sup> [*M*+*H*]<sup>+</sup>: 323.2572, found: 323.2572.

**Tributyl((3*R*\*,4*R*\*)-4-ethyl-3-(4,4,5,5-tetramethyl-1,3,2-dioxaborolan-2-yl)hex-5-en-3-yl)stannane (6i)**

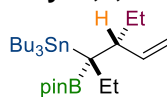

Chemical Formula: C<sub>26</sub>H<sub>53</sub>BO<sub>2</sub>Sn  
Molecular Weight: 527.23

Prepared according to general procedure **GP1** from **5e** (73 mg, 200 μmol) and *n*-Bu<sub>3</sub>SnCl (163 μL, 600 μmol).

**Yield:** 60 mg (114 μmol, 57%) as a partially separable mixture of diastereomers (dr 75:25 as determined by <sup>1</sup>H NMR spectroscopy) as a colorless oil.

**R<sub>f</sub>** = 0.65 (PE/Et<sub>2</sub>O 40:1).

*Major diastereomer:*

**<sup>1</sup>H NMR** (400 MHz, CDCl<sub>3</sub>) δ 5.58 (dt, *J* = 17.1, 9.9 Hz, 1H), 5.04 – 4.82 (m, 2H), 2.25 – 2.14 (m, 1H), 1.90 – 1.71 (m, 2H), 1.67 – 1.58 (m, 1H), 1.56 – 1.38 (m, 6H), 1.31 (ddt, *J* = 10.4, 7.3, 3.3 Hz, 6H), 1.24 – 1.15 (m, 1H), 1.21 (s, 6H), 1.19 (s, 6H), 0.94 – 0.83 (m, 18H), 0.82 (t, *J* = 7.2 Hz, 3H) ppm.

**<sup>13</sup>C NMR** (101 MHz, CDCl<sub>3</sub>) δ 142.1, 114.8, 82.3, 49.4, 29.48, 28.2, 27.8, 25.6, 25.0, 23.7, 13.8, 13.3, 13.0, 10.9 ppm.

*Note:* Carbon atom attached to boron is not visible due to quadrupolar relaxation.

*Minor diastereomer:*

**<sup>1</sup>H NMR** (400 MHz, CDCl<sub>3</sub>) δ 5.90 (dt, *J* = 17.1, 10.0 Hz, 1H), 5.02 – 4.92 (m, 2H), 2.25 – 2.14 (m, 1H), 1.90 – 1.71 (m, 2H), 1.67 – 1.58 (m, 1H), 1.56 – 1.38 (m, 6H), 1.31 (ddt, *J* = 10.4, 7.3, 3.3 Hz, 6H), 1.24 – 1.15 (m, 1H), 1.21 (s, 6H), 1.19 (s, 6H), 0.94 – 0.83 (m, 18H), 0.80 (t, *J* = 7.2 Hz, 3H) ppm.

**<sup>13</sup>C NMR** (101 MHz, CDCl<sub>3</sub>) δ 143.2, 114.6, 82.3, 49.1, 29.51, 28.2, 27.9, 25.6, 25.0, 23.7, 14.0, 13.6, 13.0, 11.1 ppm.

*Note:* Carbon atom attached to boron is not visible due to quadrupolar relaxation.

**<sup>11</sup>B NMR** (128 MHz, CDCl<sub>3</sub>): δ 33.6 ppm.

#### (4-Ethylhex-5-en-3-ylidene)cyclohexane (**6j**)

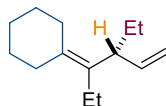

Chemical Formula: C<sub>14</sub>H<sub>24</sub>  
Molecular Weight: 192.35

Prepared according to general procedure **GP1** from **5e** (55 mg, 150 μmol) and cyclohexanone (79 μL, 750 μmol). The reaction mixture was stirred overnight at rt before being quenched by MeOH.

**Yield:** 16 mg (84 μmol, 56%) as a colorless oil.

**R<sub>f</sub>** = 0.75 (PE).

**<sup>1</sup>H NMR** (400 MHz, CDCl<sub>3</sub>) δ 5.82 (ddd, *J* = 17.2, 10.6, 6.8 Hz, 1H), 4.98 (dt, *J* = 8.3, 1.4 Hz, 1H), 4.94 (d, *J* = 1.3 Hz, 1H), 3.15 (q, *J* = 6.8 Hz, 1H), 2.16 (dddd, *J* = 24.7, 20.5, 13.0, 4.9 Hz, 4H), 1.96 (q, *J* = 7.5 Hz, 2H), 1.64 – 1.46 (m, 4H), 1.42 (dq, *J* = 20.9, 7.5 Hz, 4H), 0.93 (t, *J* = 7.5 Hz, 3H), 0.84 (t, *J* = 7.4 Hz, 3H) ppm.

**<sup>13</sup>C NMR** (101 MHz, CDCl<sub>3</sub>) δ 142.4, 135.0, 132.1, 113.4, 47.2, 31.3, 30.6, 28.8, 28.7, 27.3, 25.5, 21.4, 15.7, 12.5 ppm.

**HRMS** (APCI+) *m/z*: calcd. for C<sub>14</sub>H<sub>23</sub> [*M*–H]<sup>+</sup>: 191.1794, found: 191.1794.

**2-((1*R*\*,2*S*\*)-1-Butyl-2-vinylcyclopentyl)-4,4,5,5-tetramethyl-1,3,2-dioxaborolane (6k)**

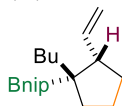

Chemical Formula: C<sub>17</sub>H<sub>31</sub>BO<sub>2</sub>  
Molecular Weight: 278.24

Prepared according to general procedure **GP1** from **5i** (66 mg, 150 μmol).

**Yield:** 35 mg (126 μmol, 84%, dr >95:05 as determined by <sup>1</sup>H NMR spectroscopy) as a colorless oil.

**R<sub>f</sub>** = 0.50 (PE/Et<sub>2</sub>O 40:1).

**<sup>1</sup>H NMR** (400 MHz, CDCl<sub>3</sub>) δ 5.89 (ddd, *J* = 17.1, 10.0, 8.8 Hz, 1H), 5.05 – 4.94 (m, 1H), 4.90 (dd, *J* = 10.1, 2.1 Hz, 1H), 2.07 (q, *J* = 8.8 Hz, 1H), 1.95 (ddd, *J* = 12.8, 8.5, 4.8 Hz, 1H), 1.79 (td, *J* = 8.4, 4.7 Hz, 2H), 1.62 (dddd, *J* = 19.4, 16.4, 9.4, 4.7 Hz, 2H), 1.52 – 1.43 (m, 1H), 1.31 – 1.25 (m, 6H), 1.22 (s, 6H), 1.21 (s, 6H), 0.87 (t, *J* = 7.0 Hz, 3H) ppm.

**<sup>13</sup>C NMR** (101 MHz, CDCl<sub>3</sub>) δ 142.0, 113.7, 83.0, 55.8, 38.2, 34.4, 32.0, 29.9, 25.2, 24.9, 23.8, 23.0, 14.3 ppm.

*Note:* Carbon atom attached to boron is not visible due to quadrupolar relaxation.

**<sup>11</sup>B NMR** (128 MHz, CDCl<sub>3</sub>): δ 34.6 ppm.

**HRMS** (APCI+) *m/z*: calcd. for C<sub>17</sub>H<sub>32</sub>BO<sub>2</sub><sup>+</sup> [*M*+H]<sup>+</sup>: 279.2490, found: 279.2498.

## 4. Determination of the stereochemical outcome

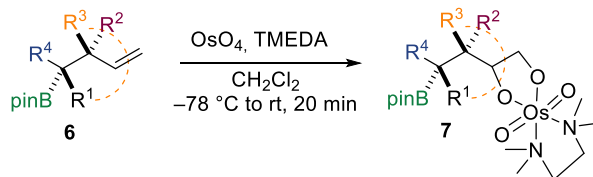

Dioxo[*N,N,N,N*-tetramethylethane-1,2-diaminetetramethylethylendiamine][*(2R^\*,3R^\*,4R^\*)*-4-(dimethyl(phenyl)silyl)-3-methyl-4-(4,4,5,5-tetramethyl-1,3,2-dioxaborolan-2-yl)pentane-1,2-diol]osmium complex (**7b**)

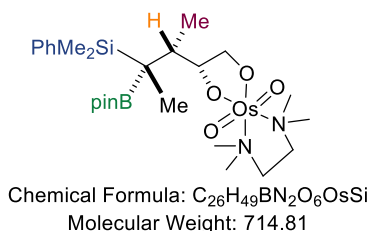

Prepared by according to a literature procedure<sup>5</sup> from **6b** (36 mg, 105  $\mu$ mol).

**Yield:** 75 mg (105  $\mu$ mol, quantitative; dr >95:05 as determined by <sup>1</sup>H NMR spectroscopy) as a dark red solid.

**R<sub>f</sub>** = 0.30 (DCM/MeOH 9:1).

**<sup>1</sup>H NMR** (400 MHz, CDCl<sub>3</sub>)  $\delta$  7.64 (dd, *J* = 6.4, 2.9 Hz, 2H), 7.27 (dd, *J* = 5.3, 2.7 Hz, 3H), 4.53 (ddd, *J* = 10.7, 6.2, 4.5 Hz, 1H), 4.14 (dd, *J* = 9.7, 4.4 Hz, 1H), 4.05 (t, *J* = 10.2 Hz, 1H), 3.02 (ddd, *J* = 24.1, 19.7, 12.1 Hz, 4H), 2.82 (s, 6H), 2.81 (s, 3H), 2.79 (s, 3H), 2.51 (p, *J* = 7.0 Hz, 1H), 1.23 (s, 3H), 1.12 (s, 6H), 1.08 (d, *J* = 7.1 Hz, 3H), 0.98 (s, 6H), 0.53 (s, 3H), 0.37 (s, 3H) ppm.

**<sup>13</sup>C NMR** (101 MHz, CDCl<sub>3</sub>)  $\delta$  140.6, 135.2, 128.4, 127.3, 91.6, 83.3, 82.8, 64.6, 64.1, 52.2, 51.9, 51.4, 51.1, 40.1, 25.5, 25.2, 16.4, 13.8, -1.7, -2.4 ppm.

**<sup>11</sup>B NMR** (128 MHz, CDCl<sub>3</sub>):  $\delta$  36.2 ppm.

**<sup>29</sup>Si NMR** (80 MHz, CDCl<sub>3</sub>)  $\delta$  -0.9 ppm.

**HRMS** (APCI+) *m/z*: calcd. for C<sub>26</sub>H<sub>50</sub>BN<sub>2</sub>O<sub>6</sub>OsSi<sup>+</sup> [*M*+H]<sup>+</sup>: 717.3141, found: 717.3126.

Recrystallization by vapour diffusion (THF with pentane as antisolvent) yielded X-ray quality crystals.

**Dioxo[*N,N,N,N*-tetramethylethane-1,2-diaminetetramethylehyldiamine][[(1-((1*R*\*,2*R*\*)-2-butyl-2-(4,4,5,5-tetramethyl-1,3,2-dioxaborolan-2-yl)cyclopentyl)ethane-1,2-diol]osmium complex (**7k**)**

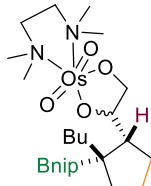

Chemical Formula: C<sub>23</sub>H<sub>47</sub>BN<sub>2</sub>O<sub>6</sub>Os

Molecular Weight: 648.68

Prepared by according to a literature procedure<sup>5</sup> from **6k** (28 mg, 90 μmol).

**Yield:** 58 mg (89 μmol, quantitative) as a partially separable mixture of diastereomers (dr 75:25 as determined by <sup>1</sup>H NMR spectroscopy) as a dark red solid.

**R<sub>f</sub>** = 0.35 (DCM/MeOH 9:1).

*Major diastereomer:*

**<sup>1</sup>H NMR** (400 MHz, CDCl<sub>3</sub>) δ 4.50 – 4.43 (m, 1H), 4.37 (dd, *J* = 9.8, 4.7 Hz, 1H), 4.13 – 4.05 (m, 1H), 3.14 – 2.97 (m, 4H), 2.87 – 2.81 (m, 12H), 2.17 (q, *J* = 7.2 Hz, 1H), 1.99 – 1.77 (m, 3H), 1.73 – 1.55 (m, 4H), 1.55 – 1.45 (m, 1H), 1.45 – 1.37 (m, 1H), 1.32 – 1.15 (m, 3H), 1.22 (s, 6H), 1.20 (s, 6H), 0.85 (t, *J* = 6.8 Hz, 3H) ppm.

**<sup>13</sup>C NMR** (101 MHz, CDCl<sub>3</sub>) δ 91.7, 85.1, 82.9, 64.4, 64.2, 52.2, 52.0, 51.3, 51.3, 51.1, 38.7, 34.4, 29.5, 28.6, 25.2, 25.1, 23.9, 23.8, 14.3 ppm.

*Note:* Carbon atom attached to boron is not visible due to quadrupolar relaxation.

*Minor diastereomer:*

**<sup>1</sup>H NMR** (400 MHz, CDCl<sub>3</sub>) δ 4.45 – 4.40 (m, 1H), 4.25 (dd, *J* = 9.7, 4.4 Hz, 1H), 3.97 (t, *J* = 9.1 Hz, 1H), 3.14 – 2.97 (m, 4H), 2.87 – 2.81 (m, 12H), 2.17 (q, *J* = 7.2 Hz, 1H), 1.99 – 1.77 (m, 3H), 1.73 – 1.55 (m, 4H), 1.55 – 1.45 (m, 1H), 1.45 – 1.37 (m, 1H), 1.32 – 1.15 (m, 3H), 1.18 (s, 12H), 0.84 (t, *J* = 7.5 Hz, 3H) ppm.

**<sup>13</sup>C NMR** (101 MHz, CDCl<sub>3</sub>) δ 93.3, 85.9, 82.4, 64.5, 64.2, 52.5, 52.4, 51.6, 51.0, 50.9, 39.4, 35.5, 31.4, 29.0, 25.3, 24.8, 24.7, 24.1, 14.4 ppm.

*Note:* Carbon atom attached to boron is not visible due to quadrupolar relaxation.

**<sup>11</sup>B NMR** (128 MHz, CDCl<sub>3</sub>): δ 36.5 ppm.

**HRMS** (APCI+) *m/z*: calcd. for C<sub>23</sub>H<sub>48</sub>BN<sub>2</sub>O<sub>6</sub>Os<sup>+</sup> [*M*+*H*]<sup>+</sup>: 651.3215, found: 651.3229.

Recrystallization by vapour diffusion (DCM/Et<sub>2</sub>O 1:3 with pentane as antisolvent) yielded X-ray quality crystals.

**Crystal structures of **7b** and **7k****

The single crystal of light brown plate (**7b**, Marek15R) from THF/pentane and the single crystal of light brown plate (**7k**, Marek44R) from Et<sub>2</sub>O/DCM/pentane, in Paratone–N oil and mounted on a Rigaku Oxford Diffraction - XtaLAB Synergy-S at 100 K. Data collection was performed using monochromated Mo K $\alpha$  radiation,  $\lambda$  = 0.71073 Å. Accurate cell parameters were obtained with the amount of indicated reflections. Using Olex2<sup>6</sup>, the structure was solved with the olex2.solve<sup>7</sup> structure solution program using Charge Flipping and refined with the ShelXL<sup>8</sup> refinement package using Least Squares minimisation. All non-hydrogen atoms were refined with anisotropic displacement parameters. The hydrogen atoms were refined isotropically in calculated positions using a riding model with their *U*<sub>iso</sub> values constrained to 1.5 times the

$U_{eq}$  of their pivot atoms for terminal  $sp^3$  carbon atoms and 1.2 times for all other carbon atoms. Software used for molecular graphics: Mercury 2022.3.0.<sup>9</sup>

### Crystal structure determination of **7b** and **7k**

| Crystal data                               | Marek15R ( <b>7b</b> )      | Marek44R ( <b>7k</b> )         |
|--------------------------------------------|-----------------------------|--------------------------------|
| CCDC code                                  | <b>2537818</b>              | <b>2537817</b>                 |
| Empirical formula                          | $C_{26}H_{49}BCIN_2O_6OsSi$ | $C_{46}H_{94}B_2N_4O_{12}Os_2$ |
| Formula weight                             | 750.22                      | 1297.34                        |
| Temperature (K)                            | 100.15                      | 100.15                         |
| Wavelength (Å)                             | 0.71073                     | 0.71073                        |
| Crystal system,                            | triclinic                   | triclinic                      |
| space group                                | P-1                         | P-1                            |
| a (Å)                                      | 9.35848(18)                 | 9.9793(6)                      |
| b (Å)                                      | 12.2804(3)                  | 12.4650(6)                     |
| c (Å)                                      | 29.0612(6)                  | 21.9750(13)                    |
| alpha                                      | 84.4348(18)                 | 87.307(4)                      |
| beta                                       | 85.4484(17)                 | 84.945(5)                      |
| gamma                                      | 89.9944(17)                 | 89.968(4)                      |
| Volume (Å <sup>3</sup> )                   | 3313.57(12)                 | 2719.9(3)                      |
| Z                                          | 4                           | 2                              |
| Calculated density (mg/m <sup>3</sup> )    | 1.504                       | 1.584                          |
| Absorption coefficient (mm <sup>-1</sup> ) | 4.003                       | 4.726                          |
| F(000)                                     | 1516                        | 1312                           |
| Crystal size (mm)                          | 0.24 × 0.18 × 0.15          | 0.18 × 0.18 × 0.09             |
| 2Theta range                               | 4.574 - 59.82               | 4.648 - 60.3                   |
| Reflection collected/unique                | 47960 / 15023               | 34192 / 12525                  |
| Rint                                       | 0.0605                      | 0.0832                         |
| Completeness (%)                           | 98.9                        | 99.8                           |
| Absorption correction                      | semi-empirical              | semi-empirical                 |
| Data/restraints/ parameters                | 15023 / 1164 / 814          | 12525 / 626 / 614              |
| Goodness-of-fit on F <sup>2</sup>          | 1.030                       | 1.033                          |
| R1, wR2 [ $>2\sigma(I)$ ]                  | 0.0615, 0.1629              | 0.0668, 0.1658                 |
| R1, wR2 (all data)                         | 0.0765, 0.1728              | 0.0928, 0.1804                 |
| Largest diff. peak and hole                | 3.73/-3.15                  | 3.04/-2.40                     |
| Diffractometer                             | XtaLAB Synergy-S            | XtaLAB Synergy-S               |

---

## 5. NMR spectra

**((1*S*\*,2*R*\*,3*S*\*)-3-Allyl-2-methyl-2-(4,4,5,5-tetramethyl-1,3,2-dioxaborolan-2-yl)cyclopropyl)methanol (**5b-OH**)**

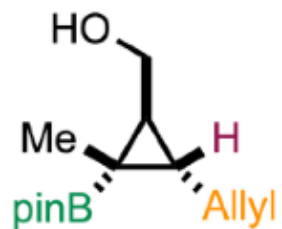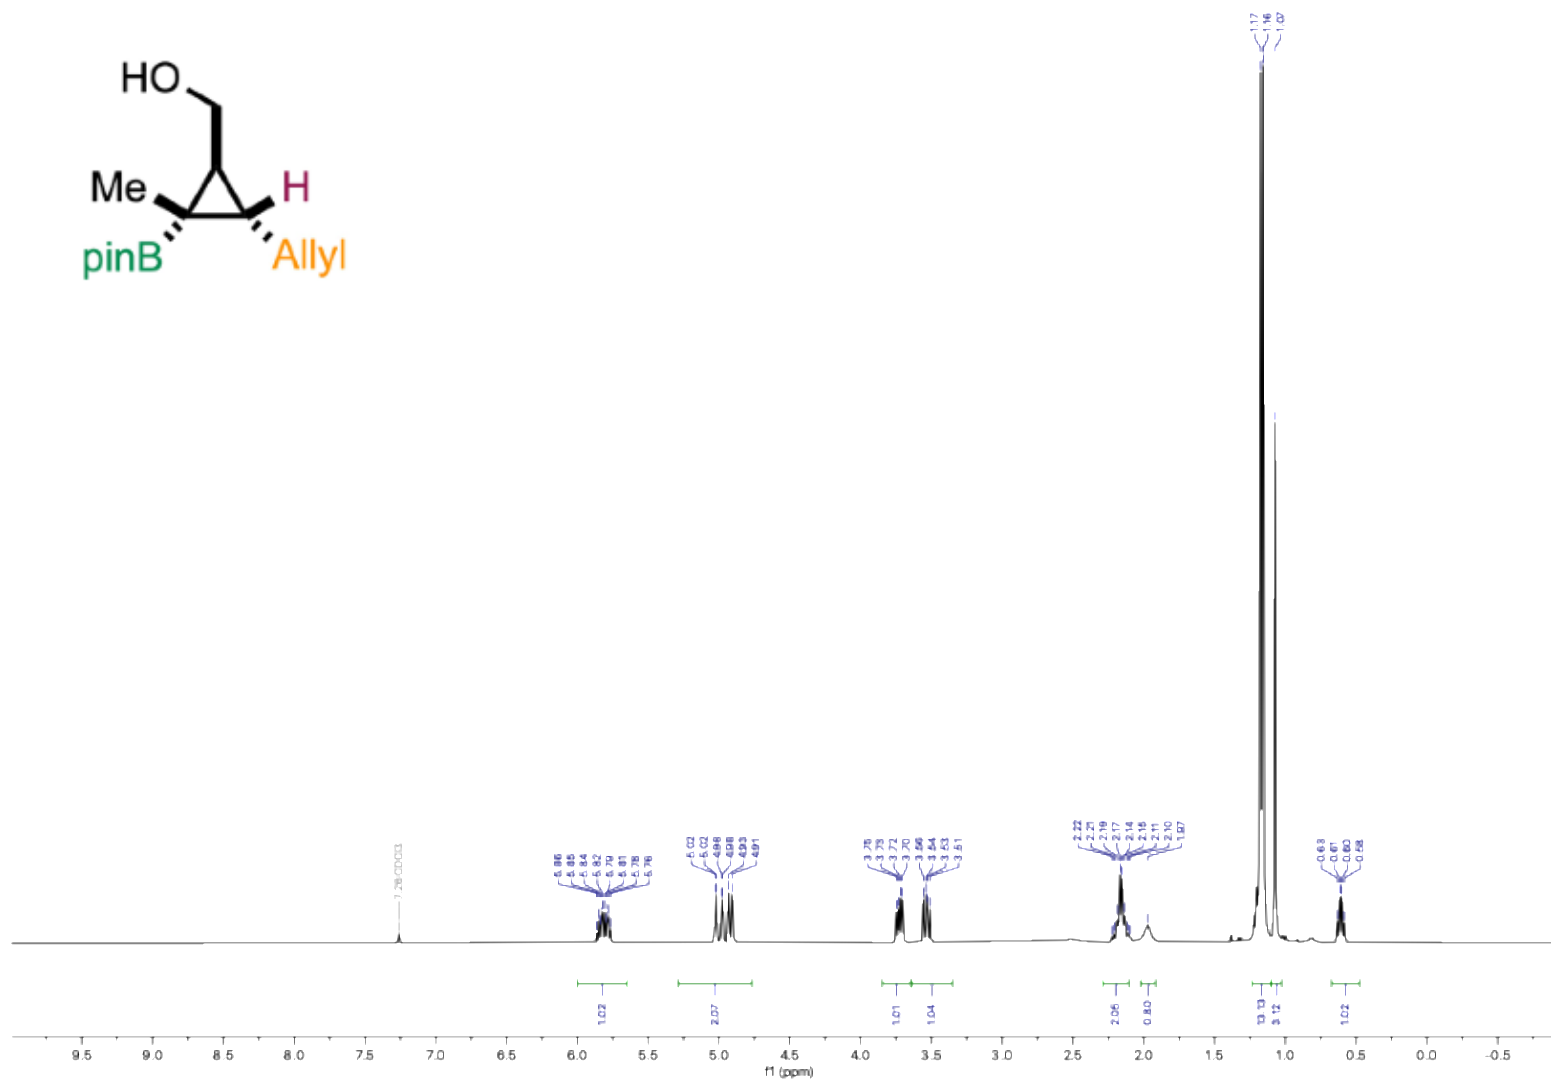

**<sup>1</sup>H NMR spectrum (400 MHz, CDCl<sub>3</sub>)**

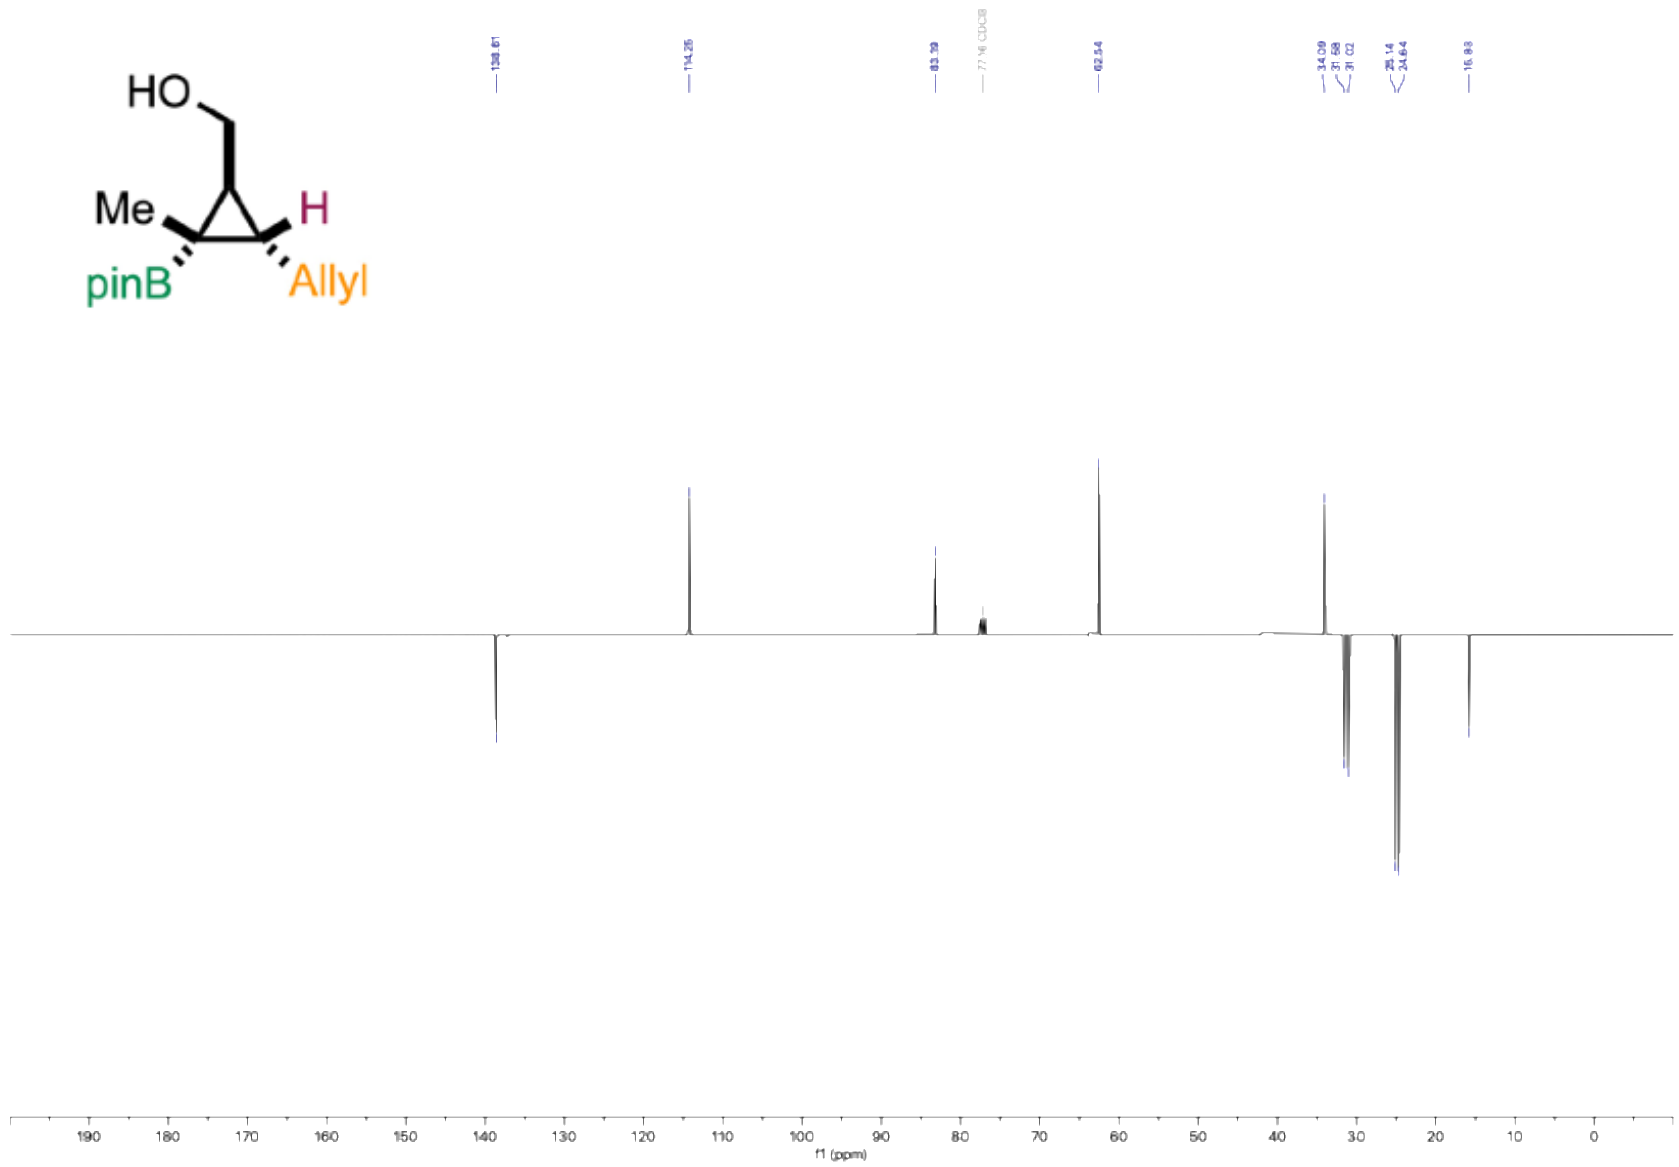

$^{13}\text{C}$  NMR spectrum (101 MHz,  $\text{CDCl}_3$ )

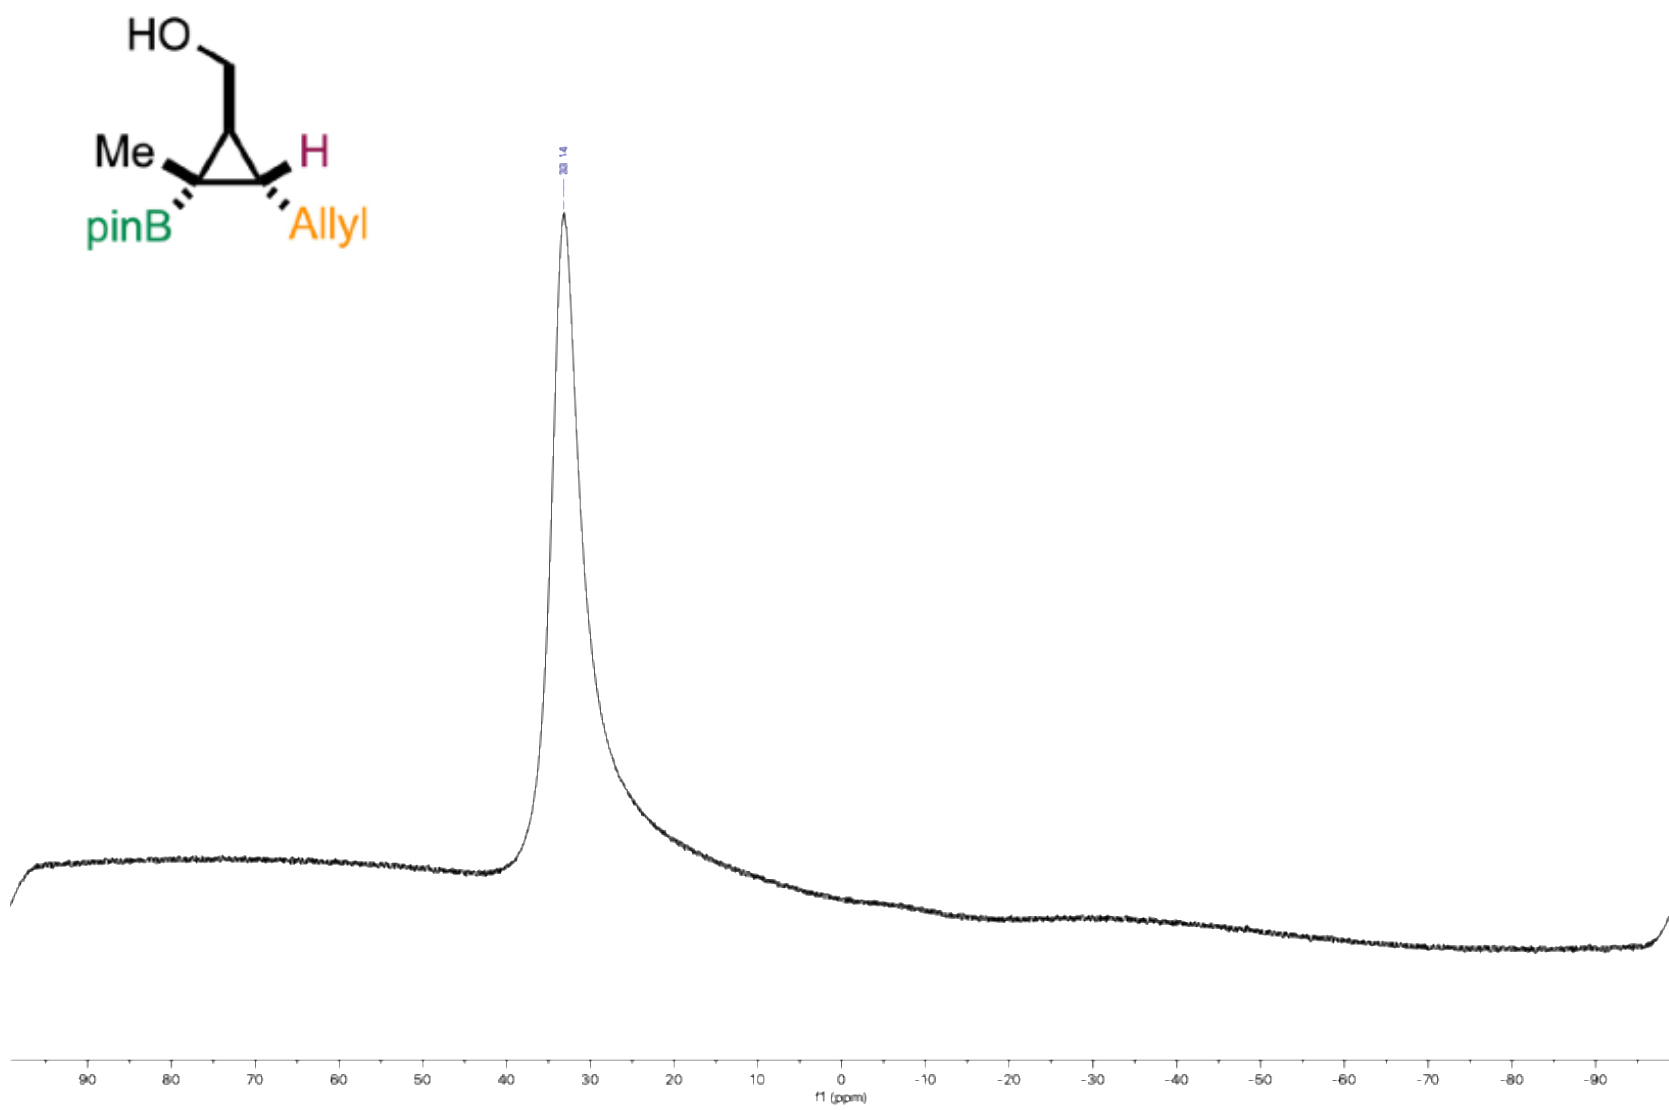

$^{11}\text{B}$  NMR spectrum (128 MHz,  $\text{CDCl}_3$ )

**((1*S*\*,2*R*\*,3*R*\*)-2,3-dipropyl-2-(4,4,5,5-tetramethyl-1,3,2-dioxaborolan-2-yl)cyclopropyl)methanol**  
**5c-OH**

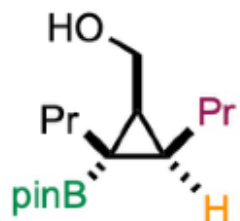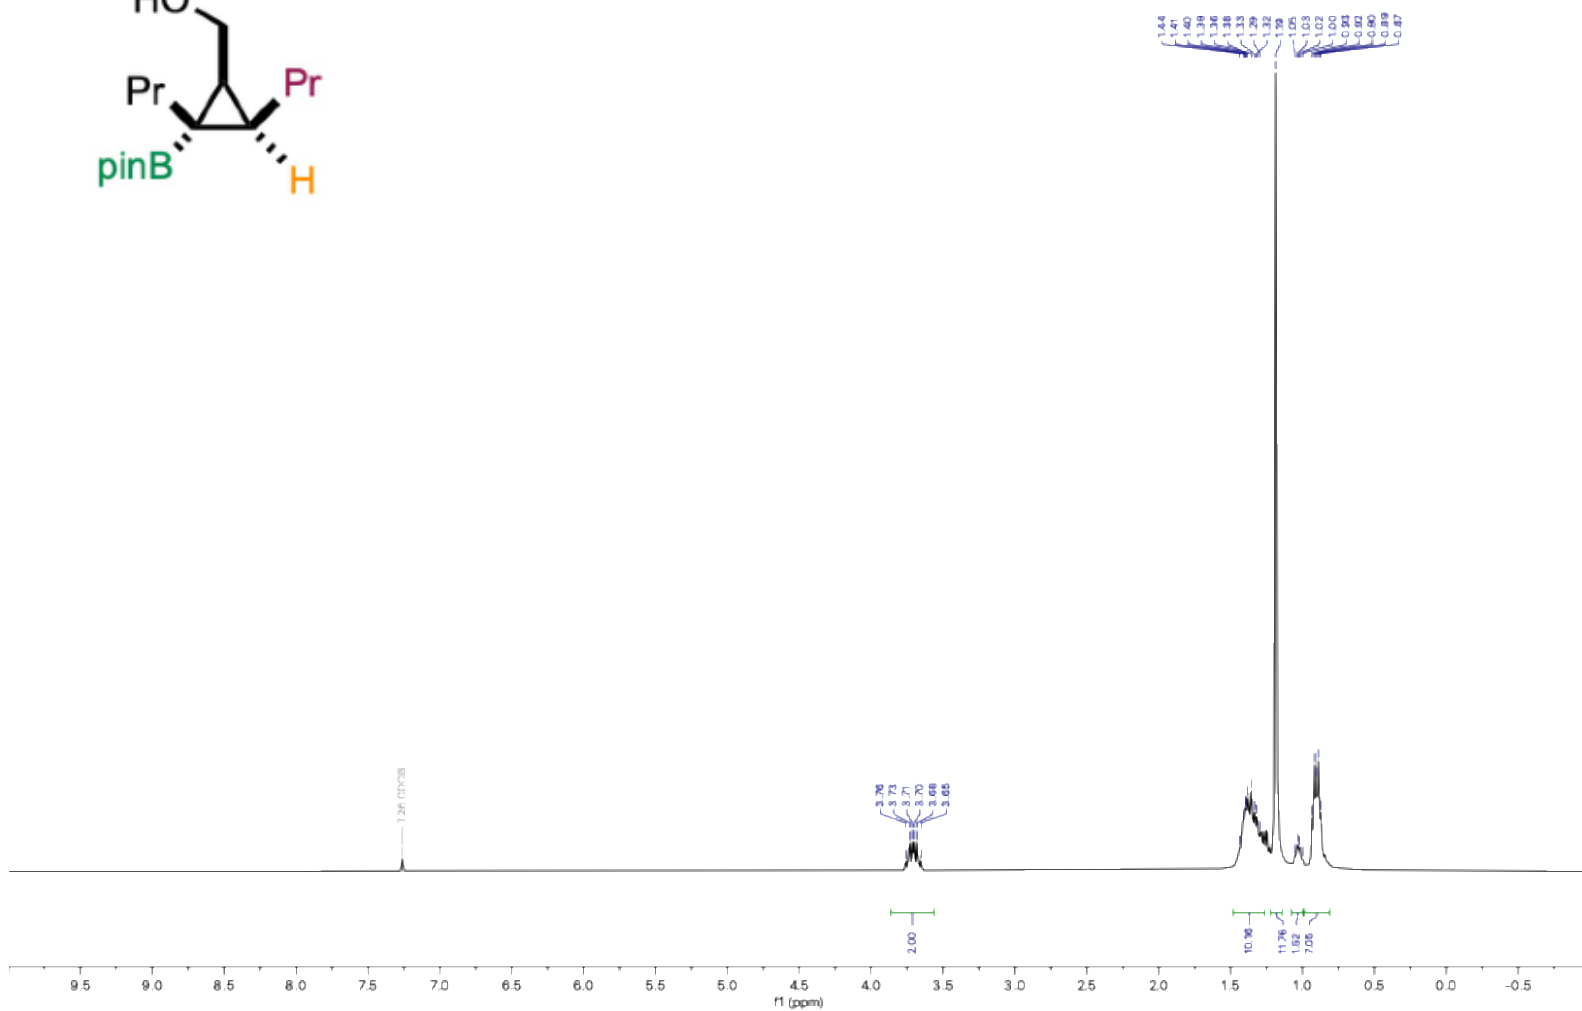

<sup>1</sup>H NMR spectrum (400 MHz, CDCl<sub>3</sub>)

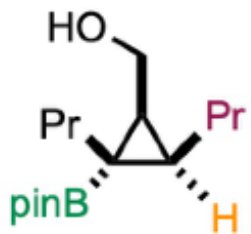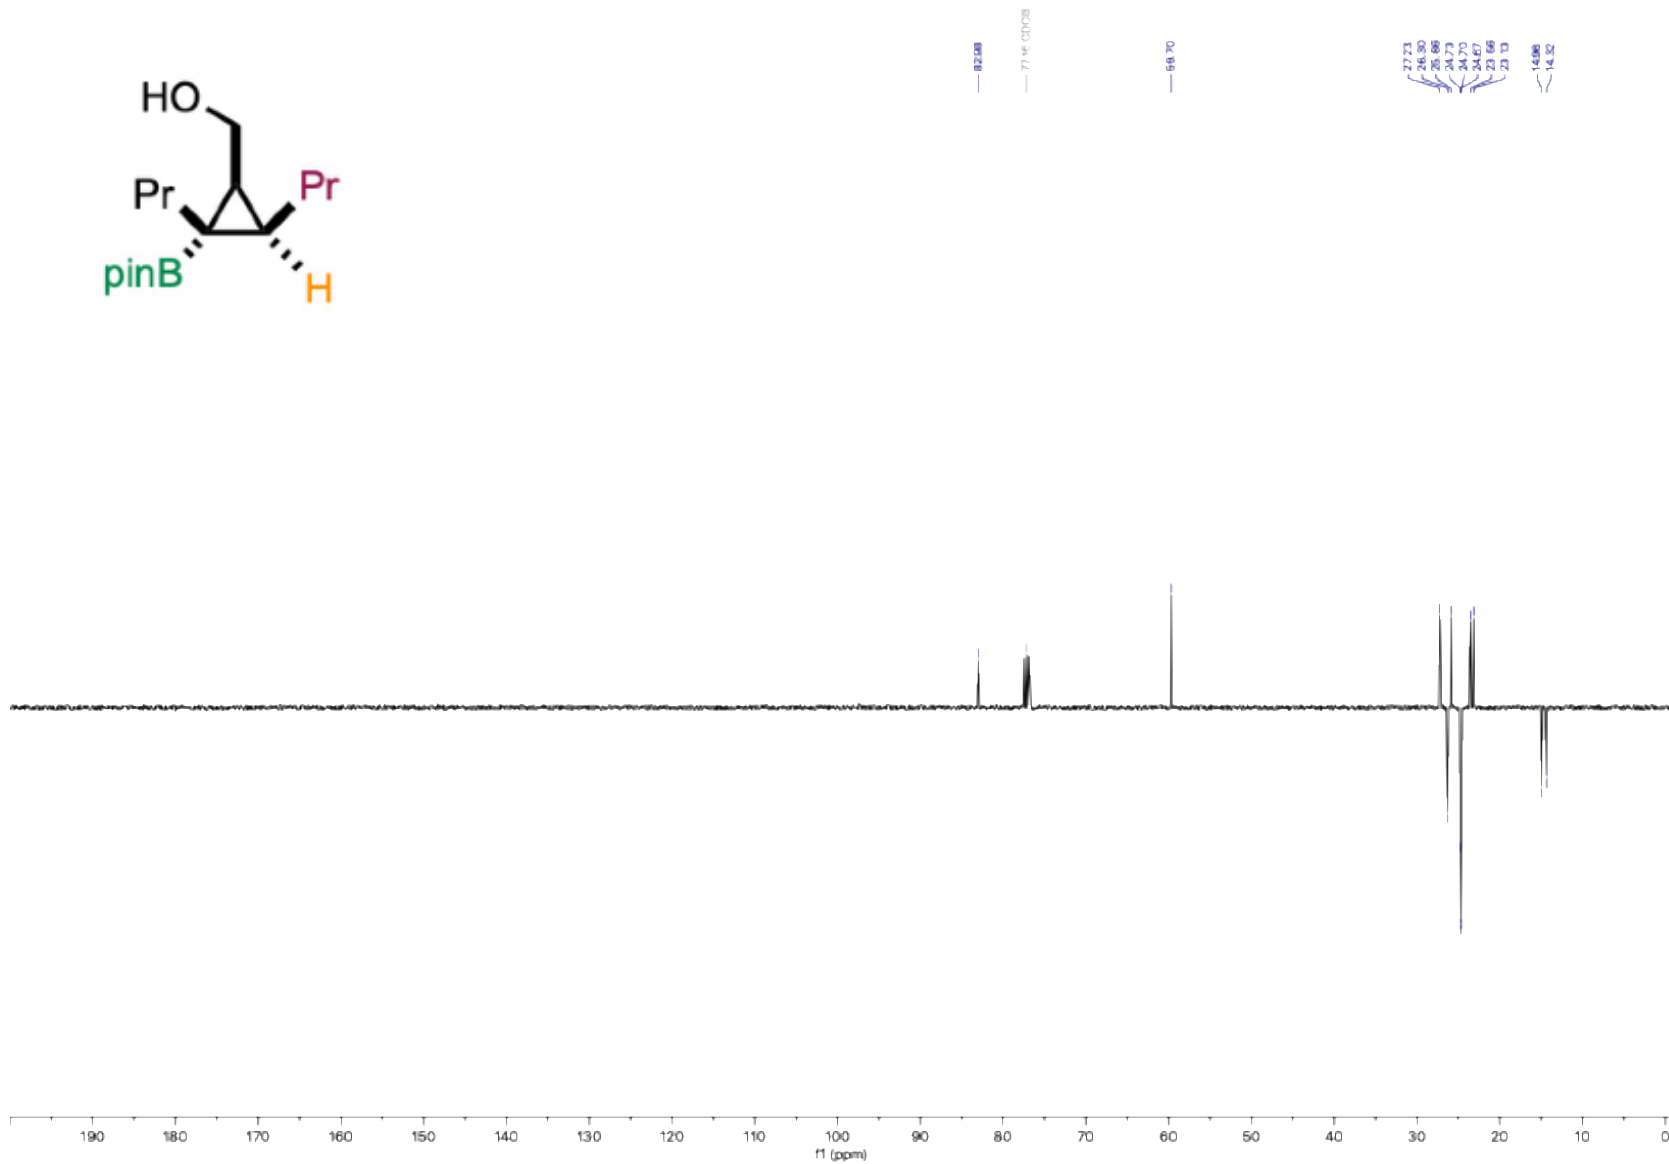

<sup>13</sup>C NMR spectrum (101 MHz, CDCl<sub>3</sub>)

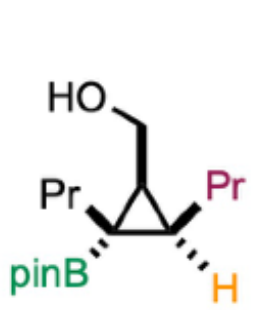

33.27

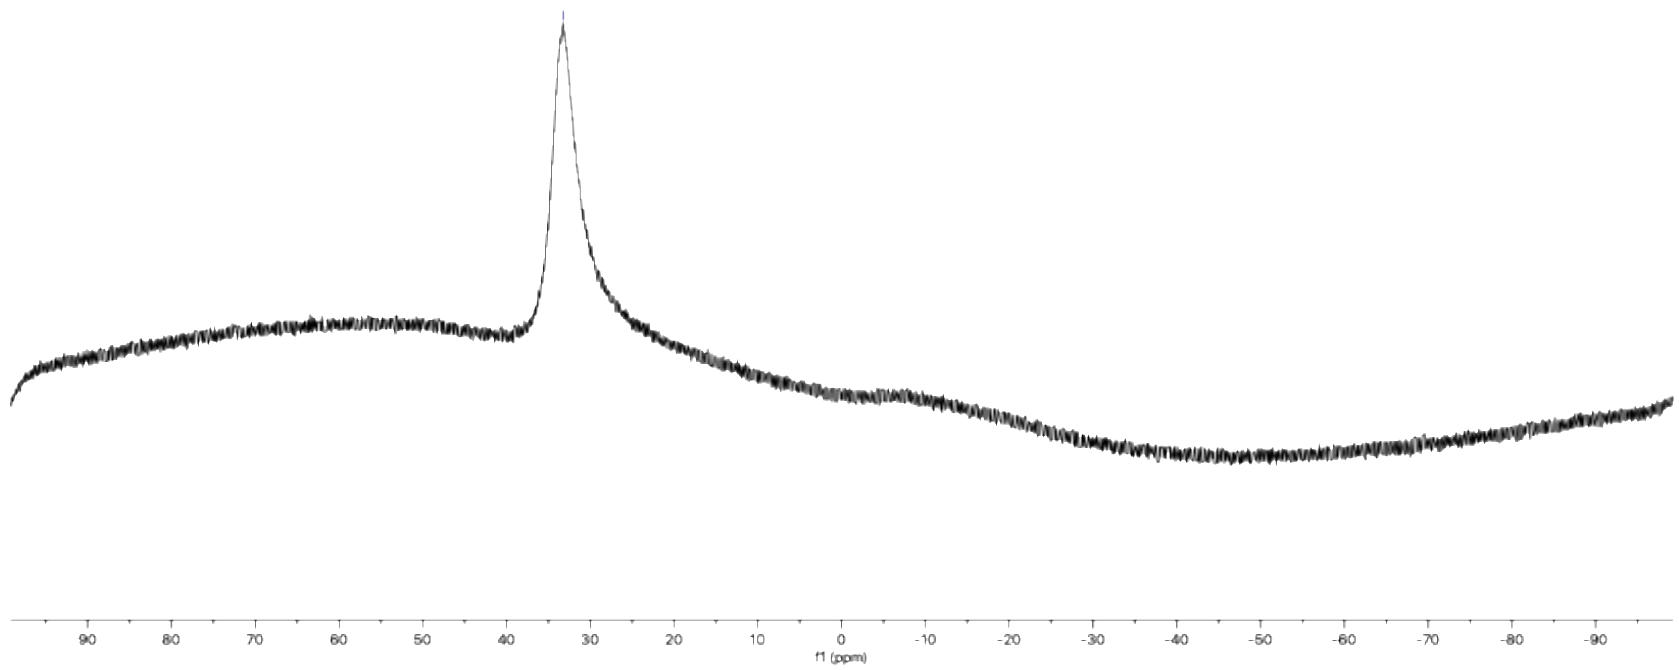

<sup>11</sup>B NMR spectrum (128 MHz, CDCl<sub>3</sub>)

**((1*S*\*,2*R*\*,3*S*\*)-2,3-Dipropyl-2-(4,4,5,5-tetramethyl-1,3,2-dioxaborolan-2-yl)cyclopropyl)methanol (5d-OH)**

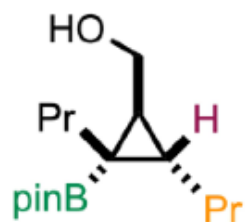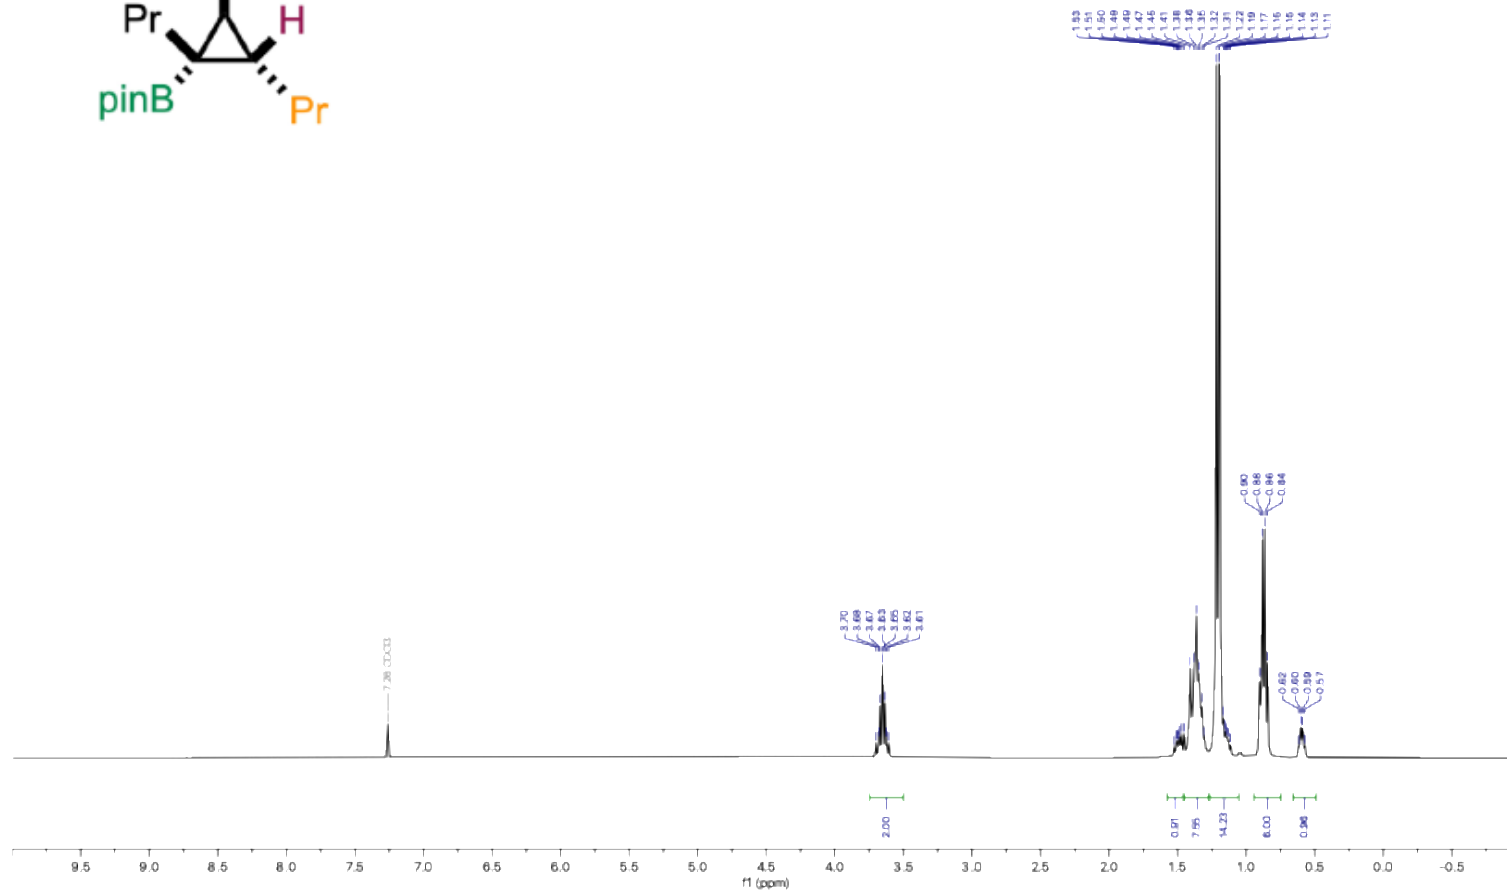

<sup>1</sup>H NMR spectrum (400 MHz, CDCl<sub>3</sub>)

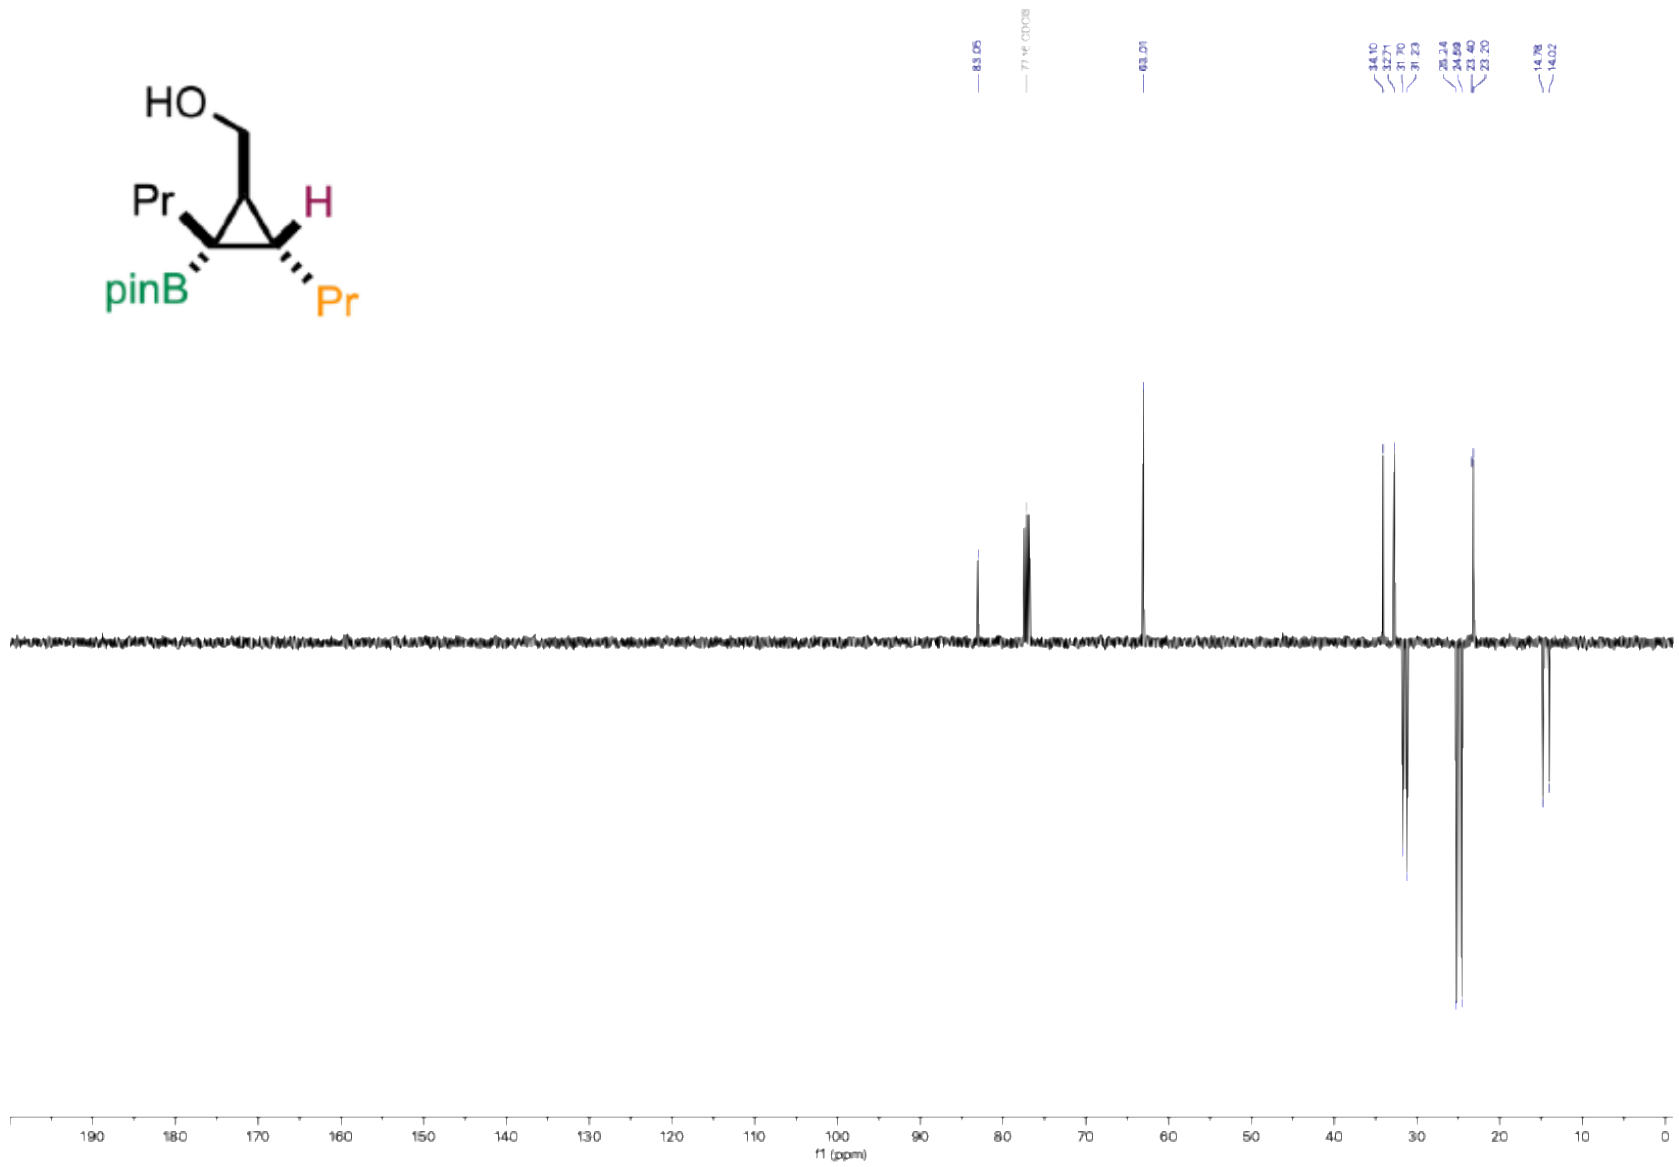

<sup>13</sup>C NMR spectrum (101 MHz, CDCl<sub>3</sub>)

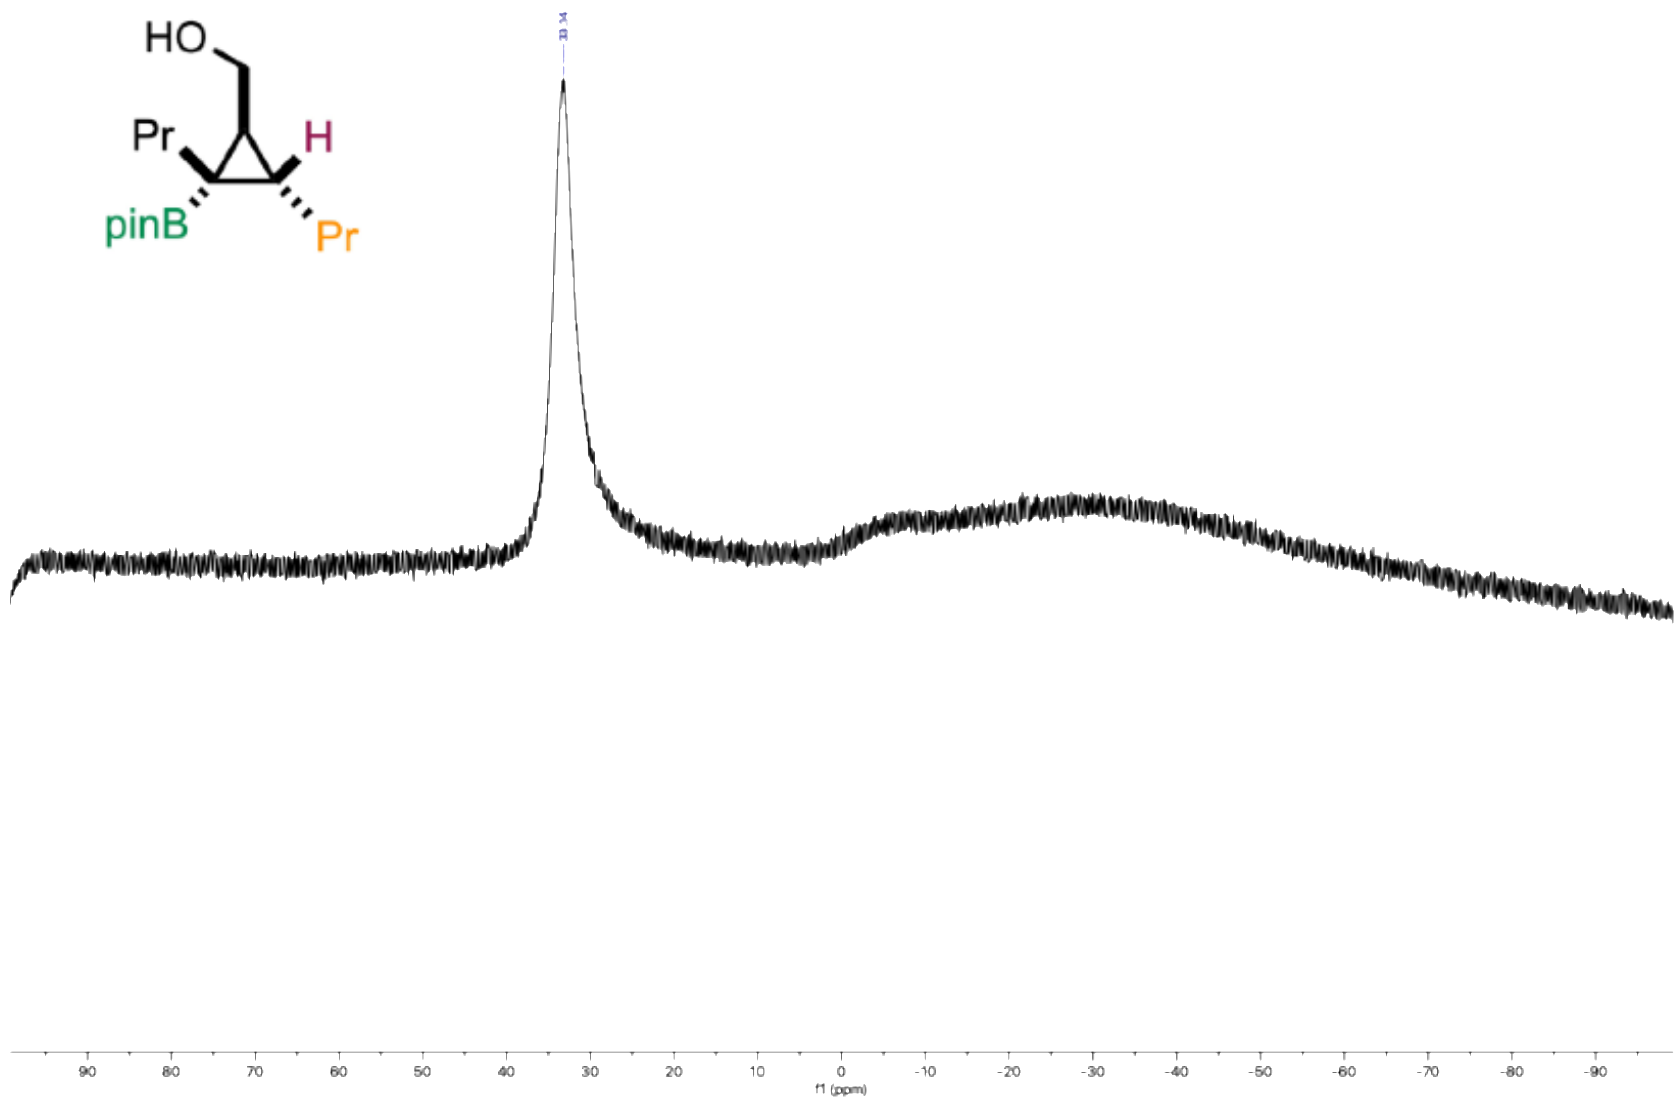

$^{11}\text{B}$  NMR spectrum (128 MHz,  $\text{CDCl}_3$ )

**((1*S*,2*R*\*,3*S*\*)-2-Cyclohexyl-3-propyl-2-(4,4,5,5-tetramethyl-1,3,2-dioxaborolan-2-yl)cyclopropyl)methanol (5g-OH)**

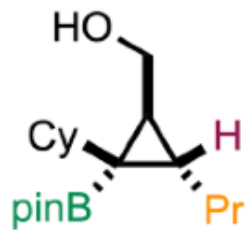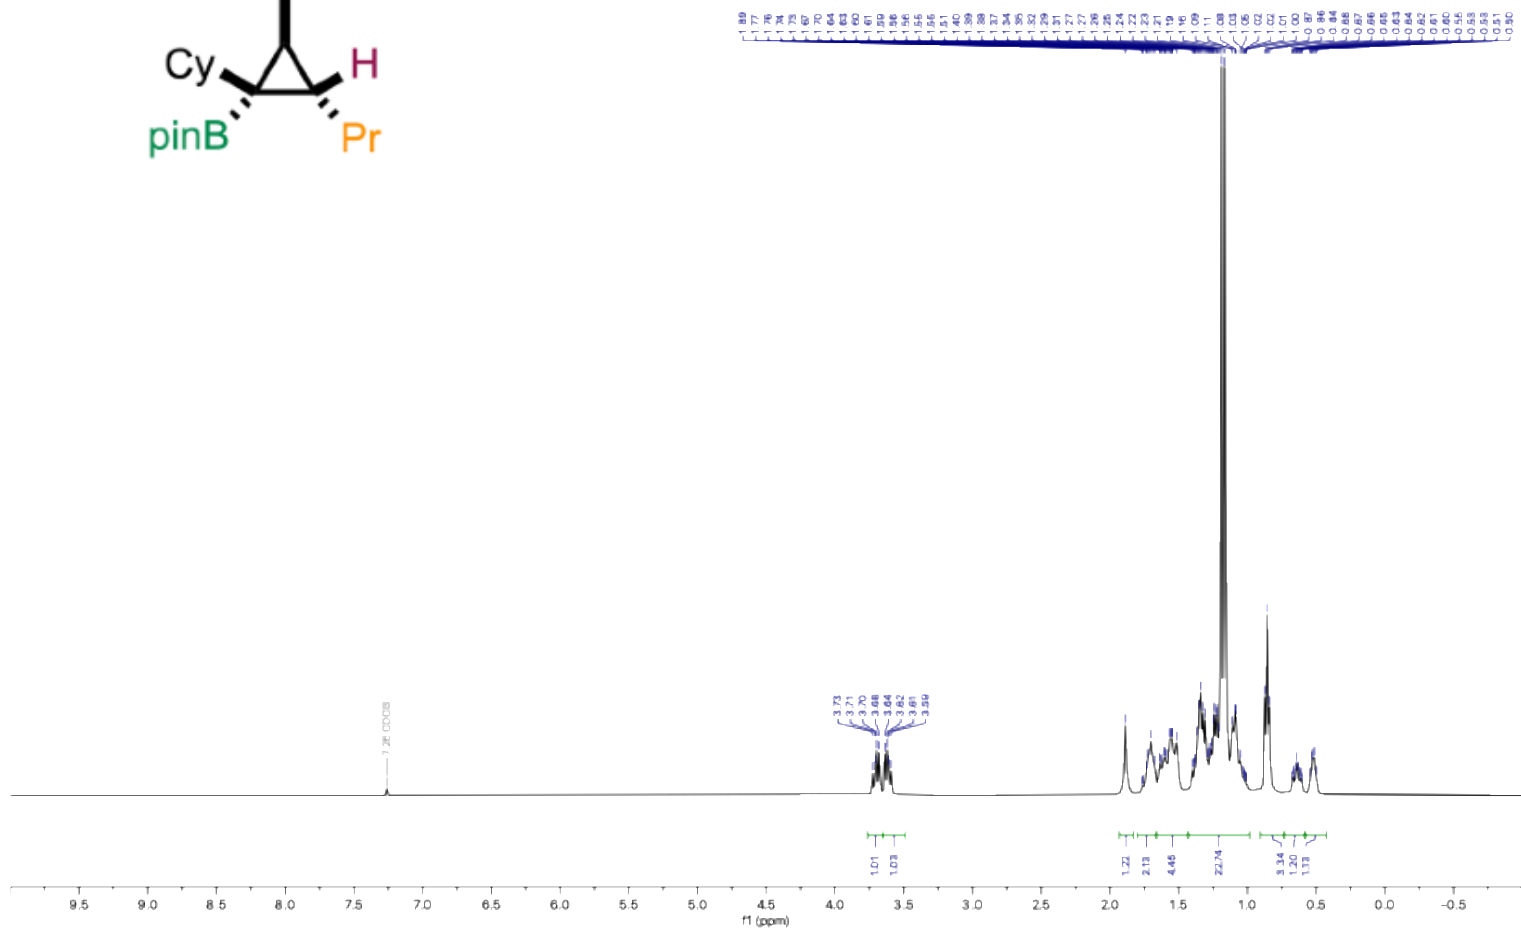

<sup>1</sup>H NMR spectrum (400 MHz, CDCl<sub>3</sub>)

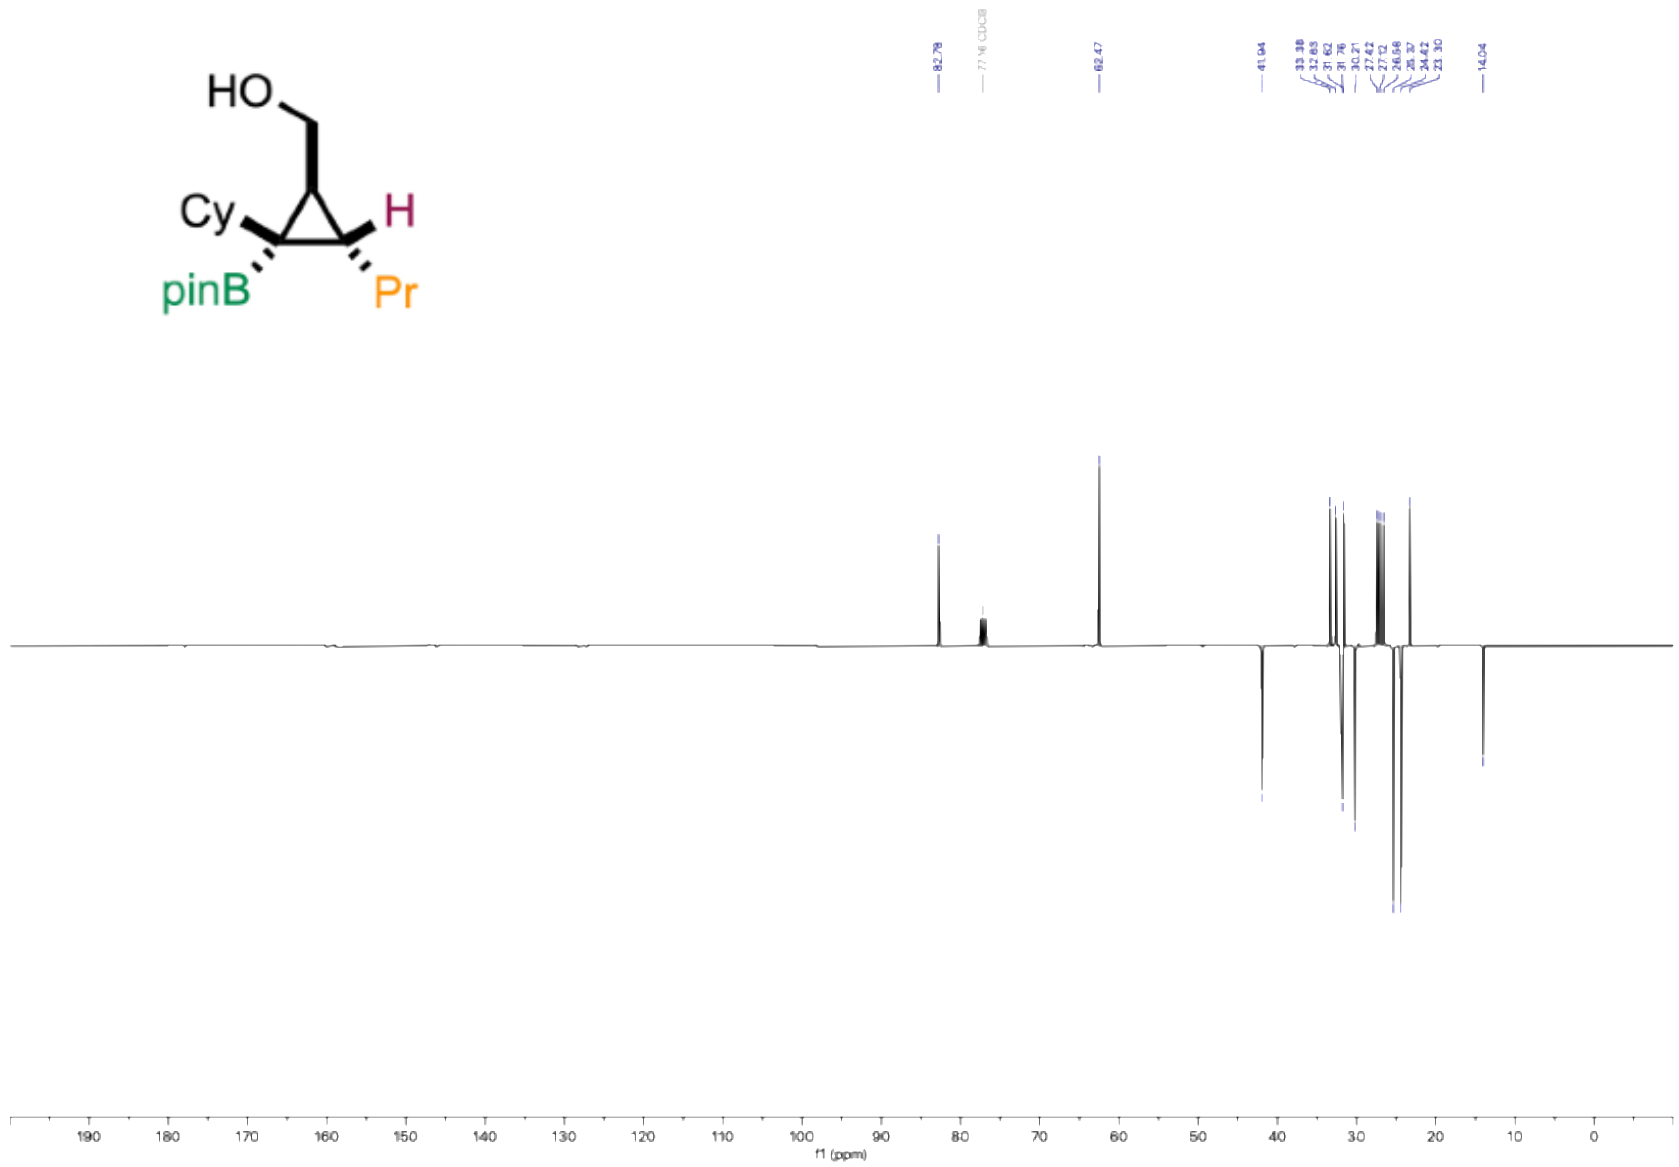

<sup>13</sup>C NMR spectrum (101 MHz, CDCl<sub>3</sub>)

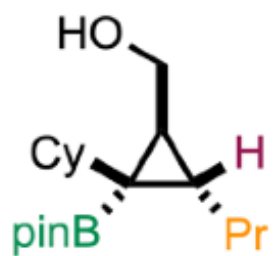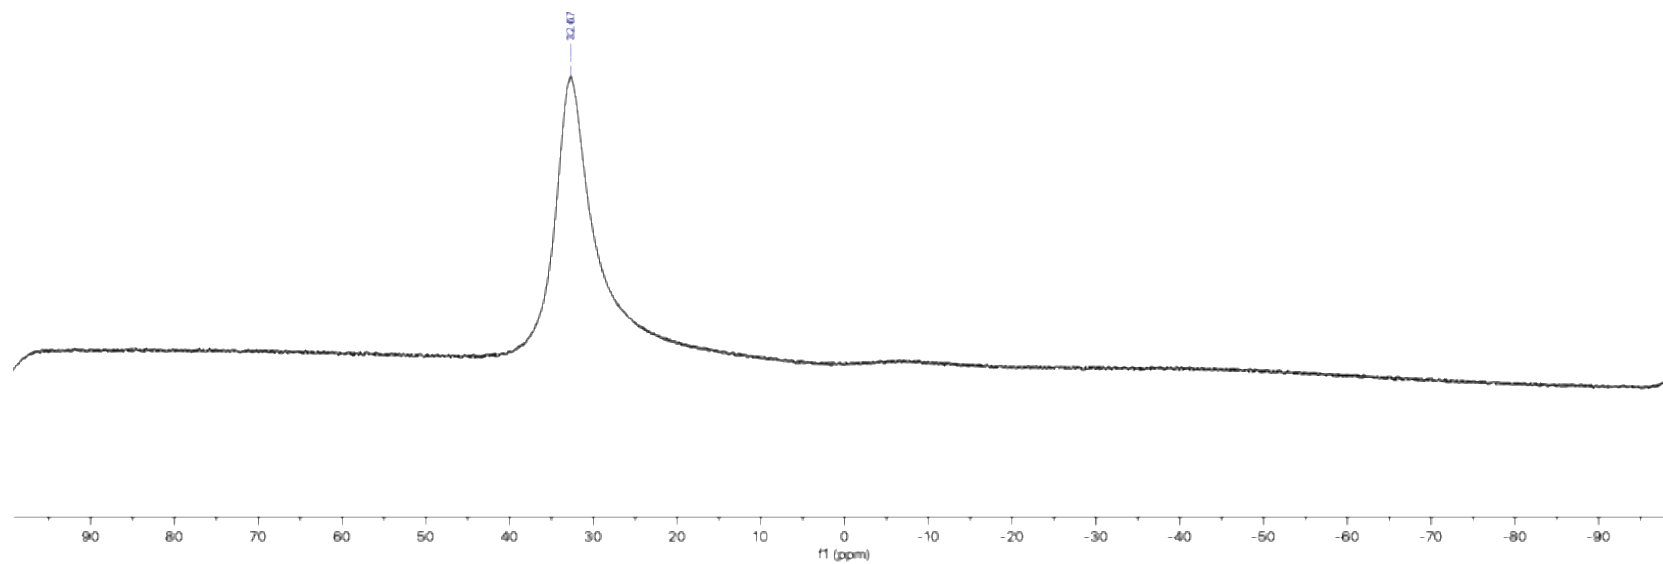

<sup>11</sup>B NMR spectrum (128 MHz, CDCl<sub>3</sub>)

**((1*S*\*,2*R*\*,3*S*\*)-2-Butyl-3-(3-chloropropyl)-2-(4,4,5,5-tetramethyl-1,3,2-dioxaborolan-2-yl)cyclopropyl)methanol (5i-OH)**

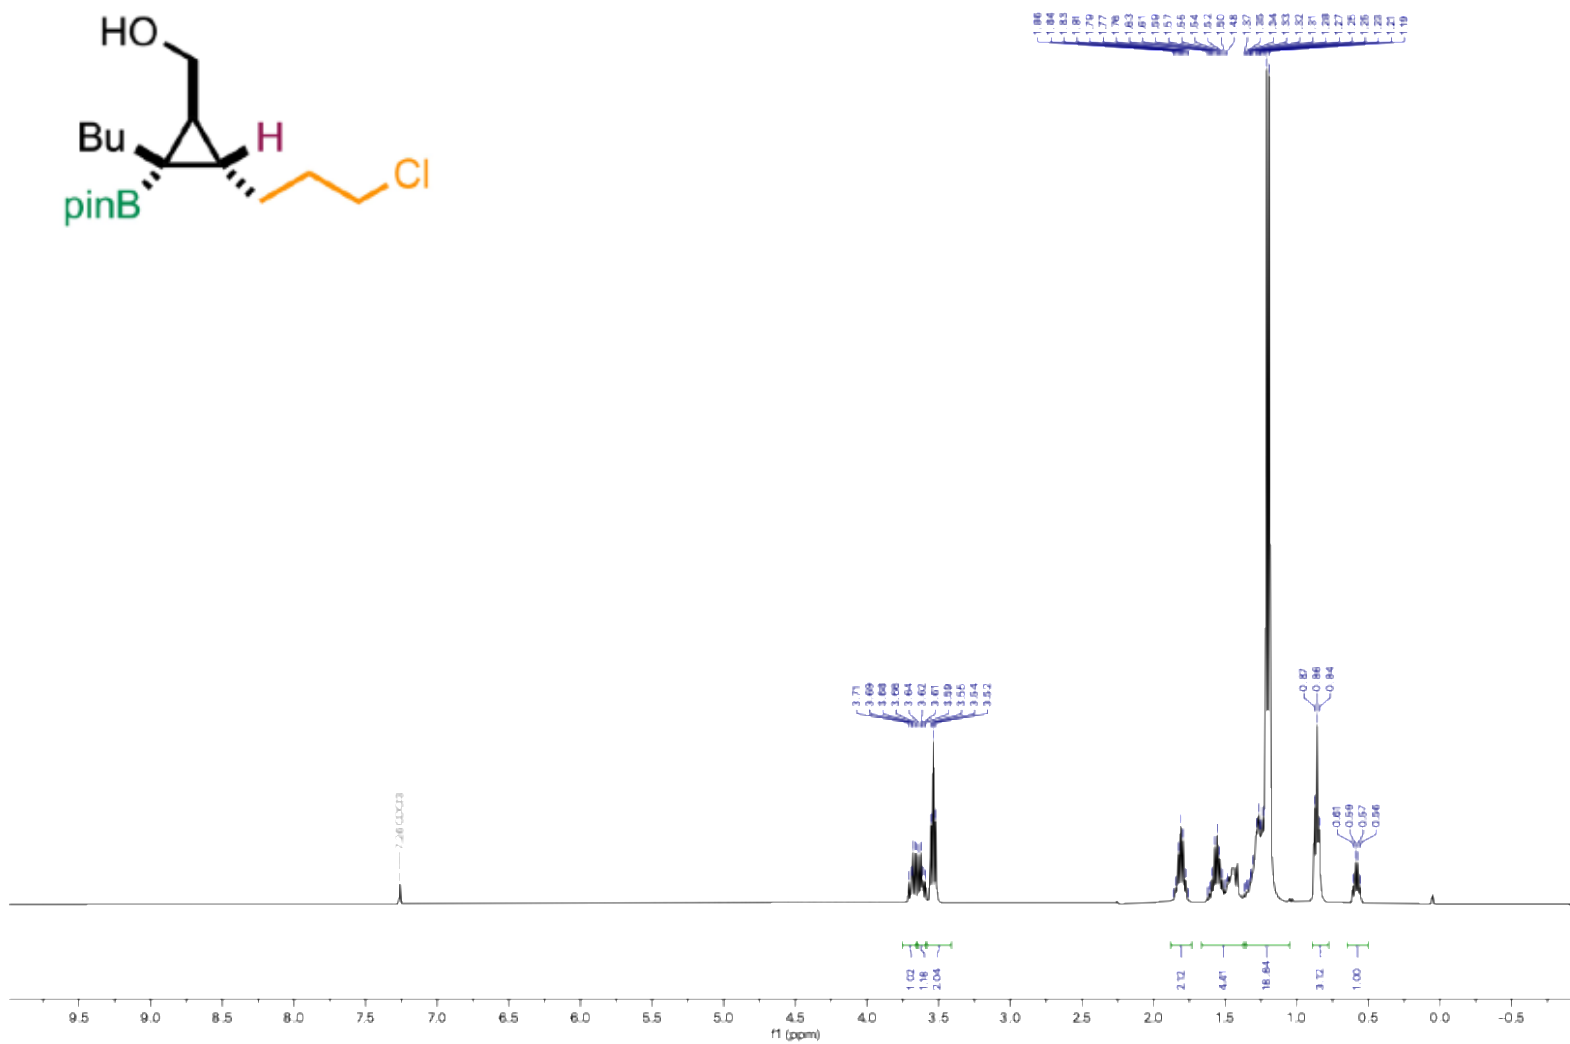

<sup>1</sup>H NMR spectrum (400 MHz, CDCl<sub>3</sub>)

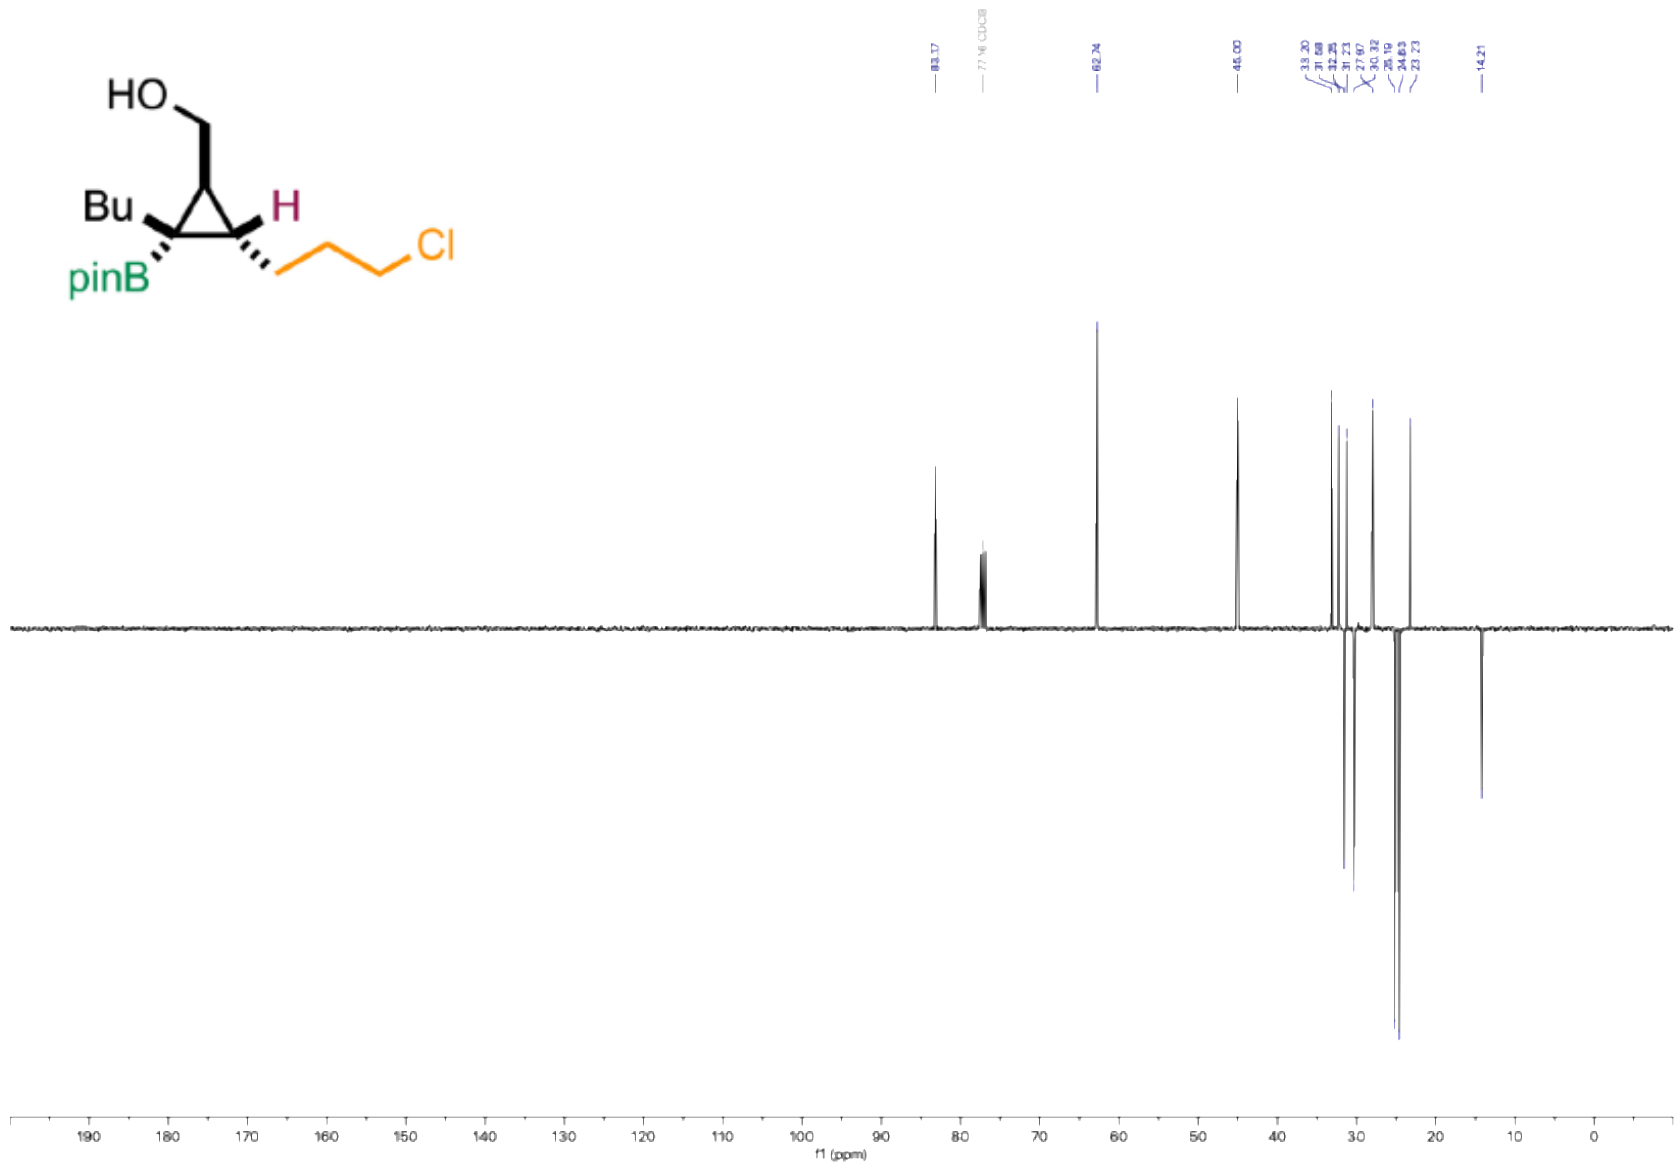

<sup>13</sup>C NMR spectrum (101 MHz, CDCl<sub>3</sub>)

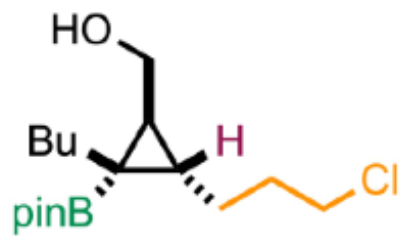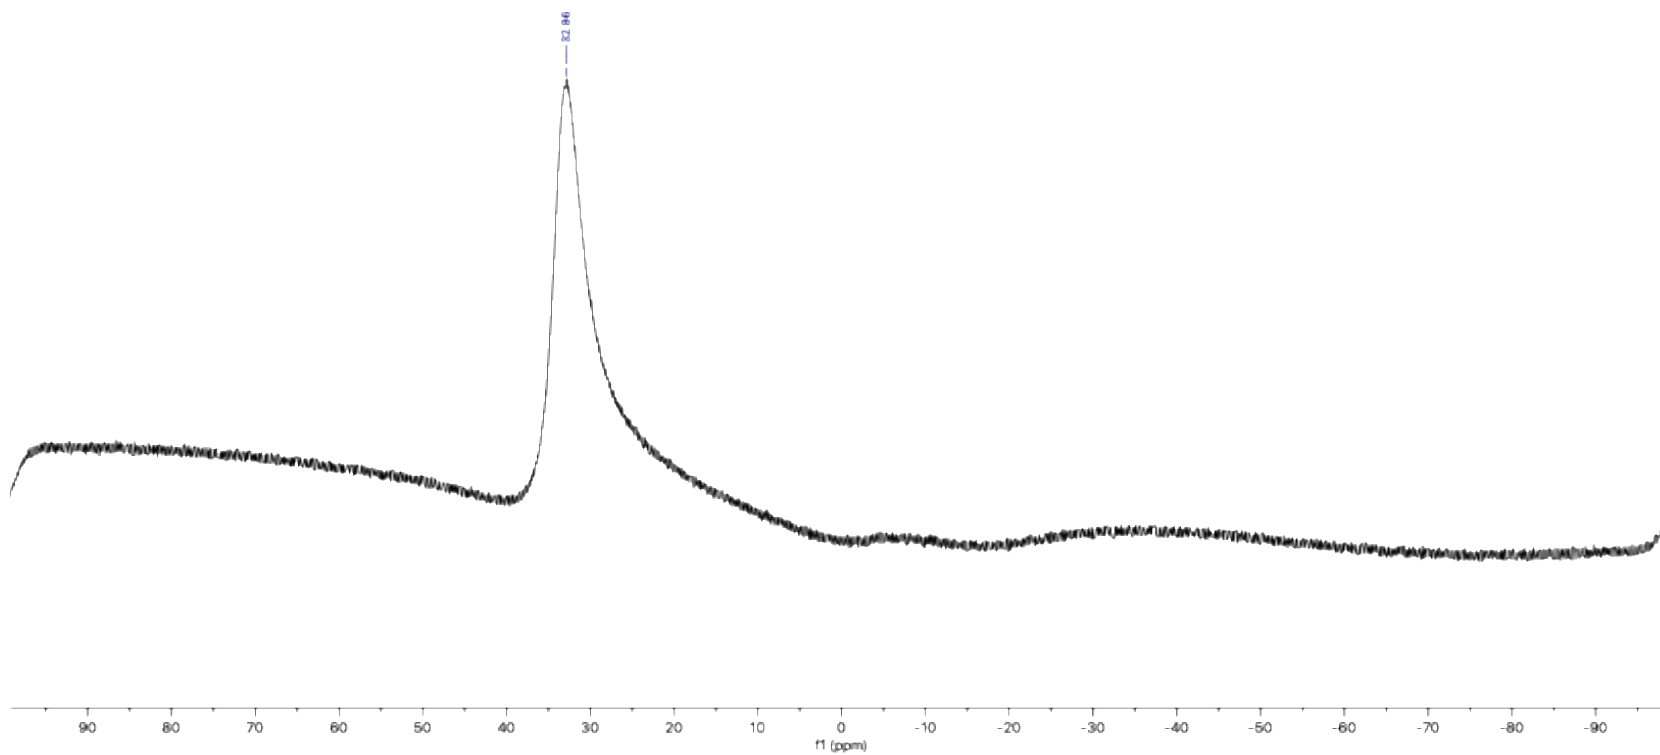

<sup>11</sup>B NMR spectrum (128 MHz, CDCl<sub>3</sub>)

Trimethyl((2*R*\*,3*R*\*)-3-methyl-2-(4,4,5,5-tetramethyl-1,3,2-dioxaborolan-2-yl)pent-4-en-2-yl)silane (**6a**)

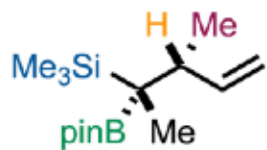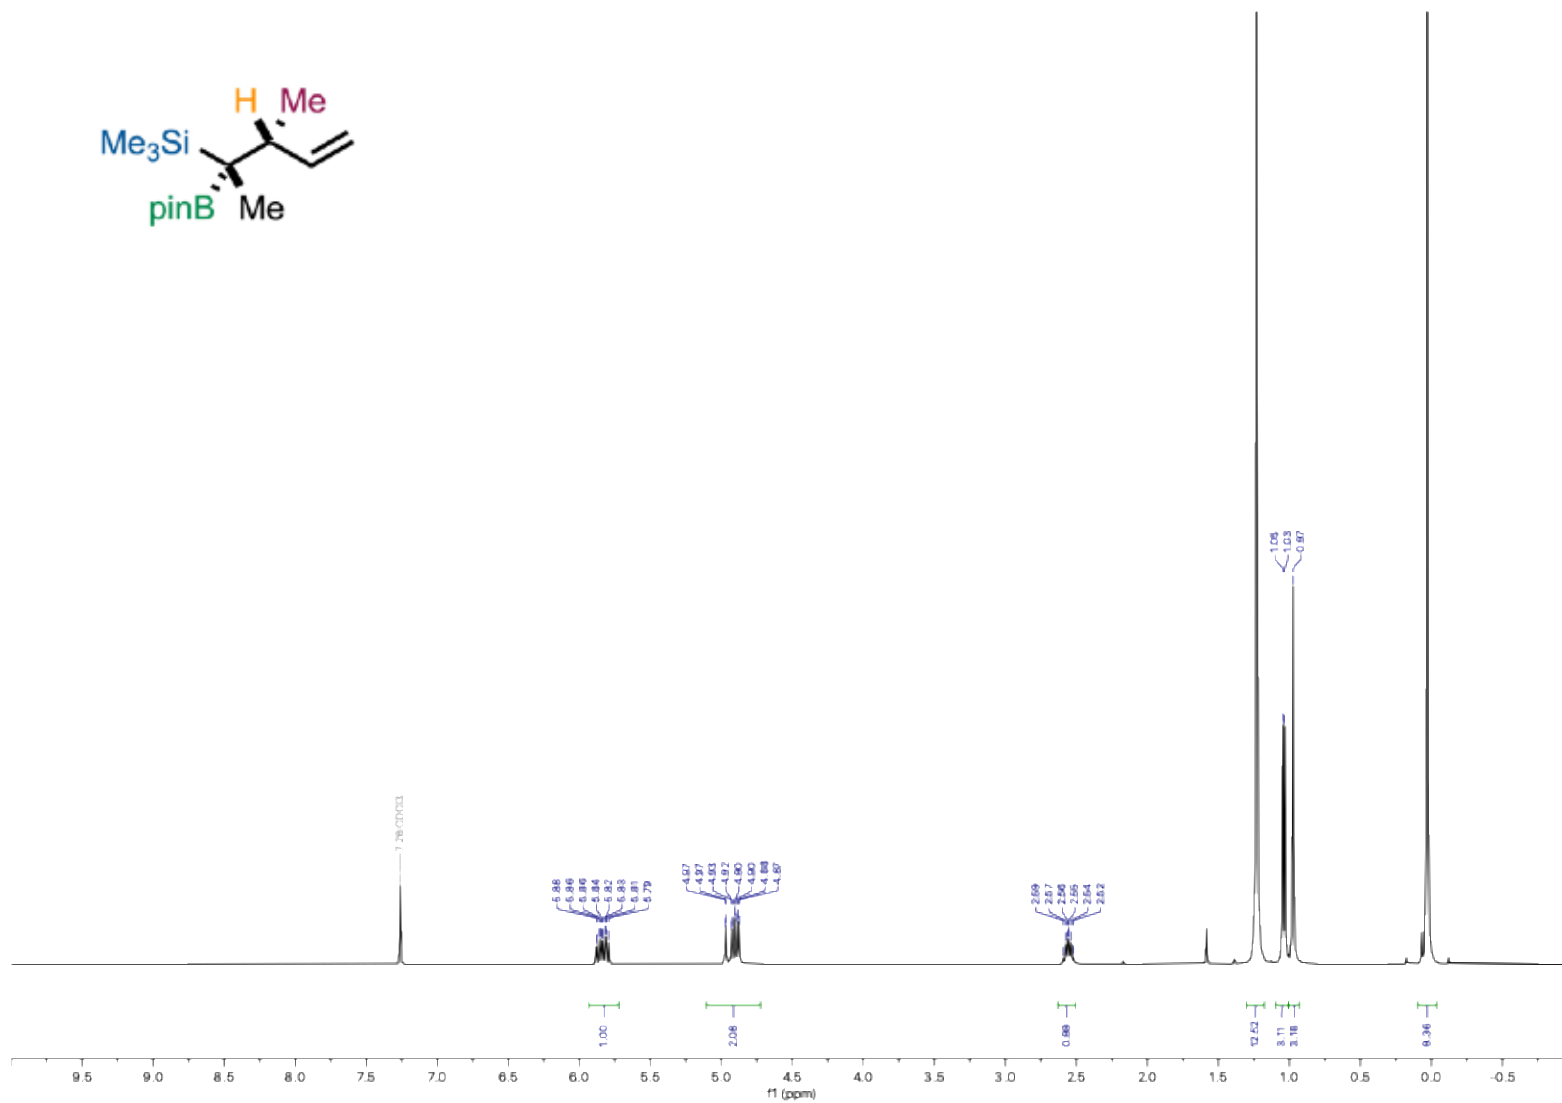

<sup>1</sup>H NMR spectrum (400 MHz, CDCl<sub>3</sub>)

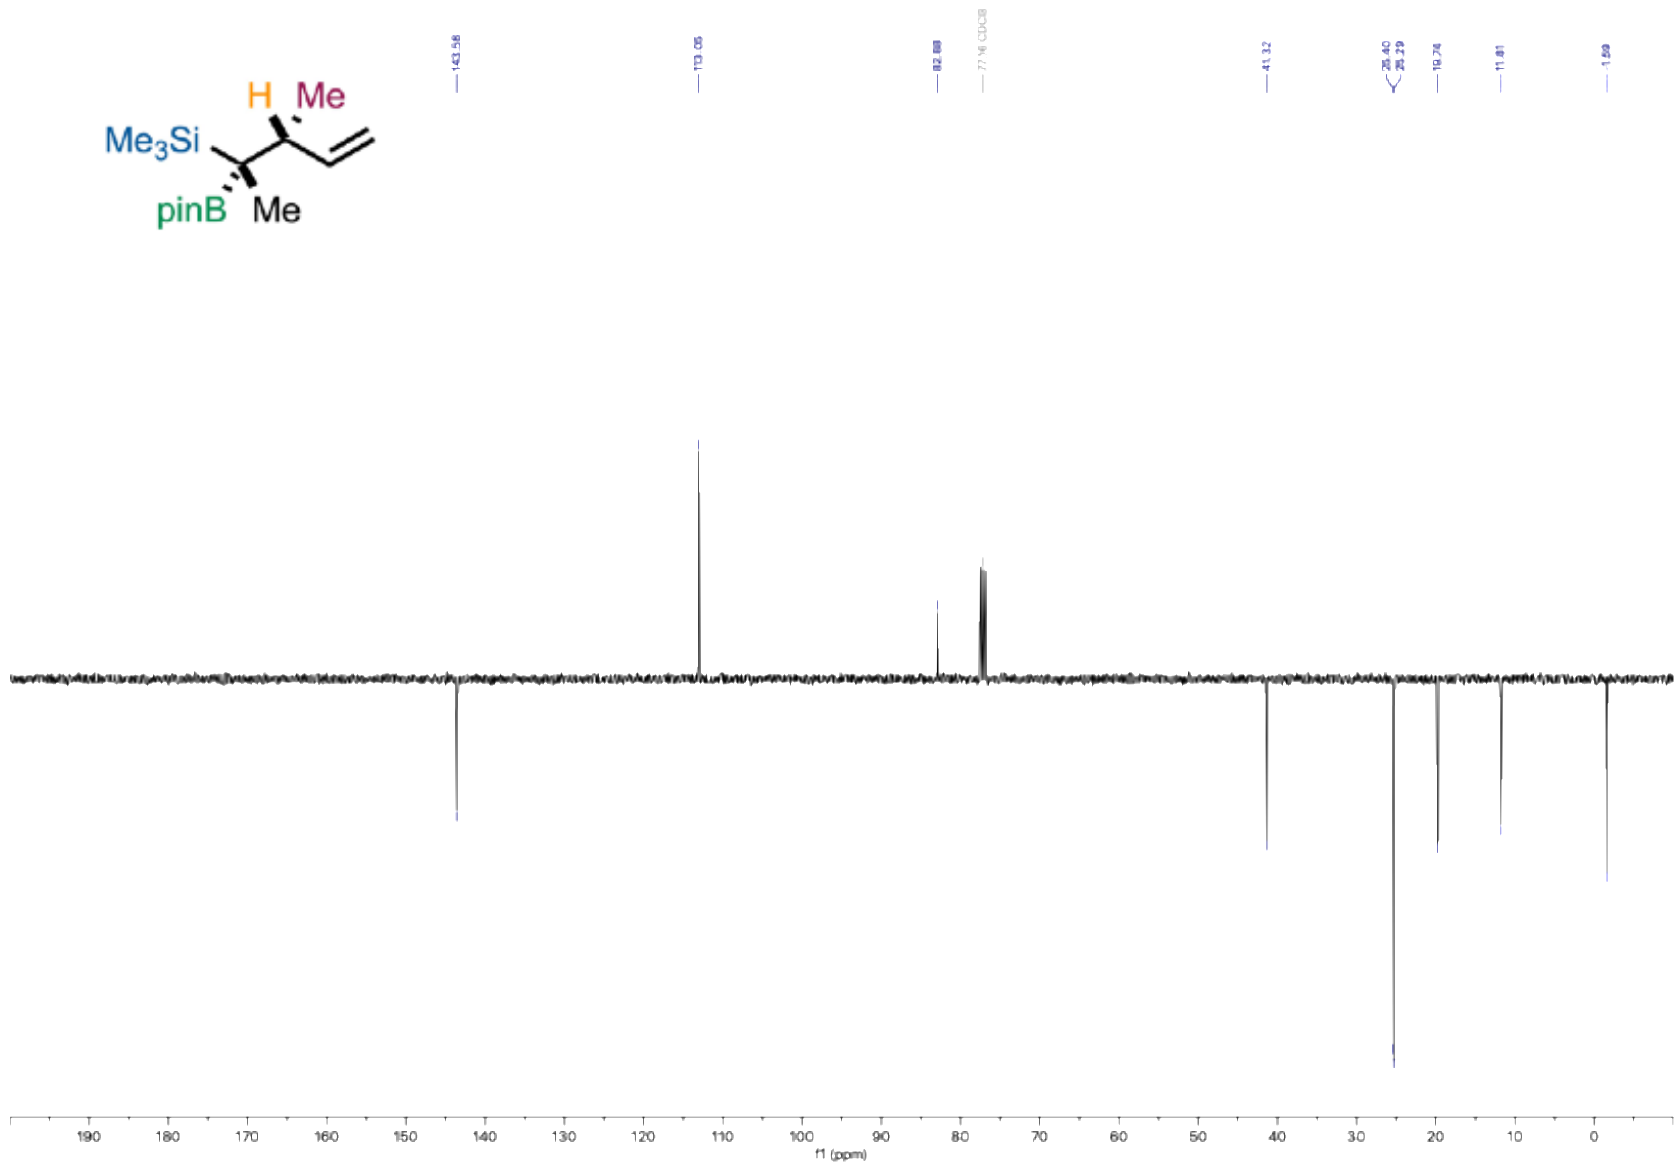

<sup>13</sup>C NMR spectrum (101 MHz, CDCl<sub>3</sub>)

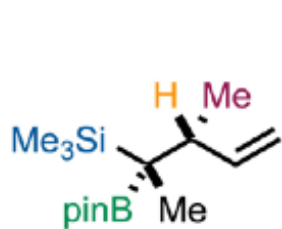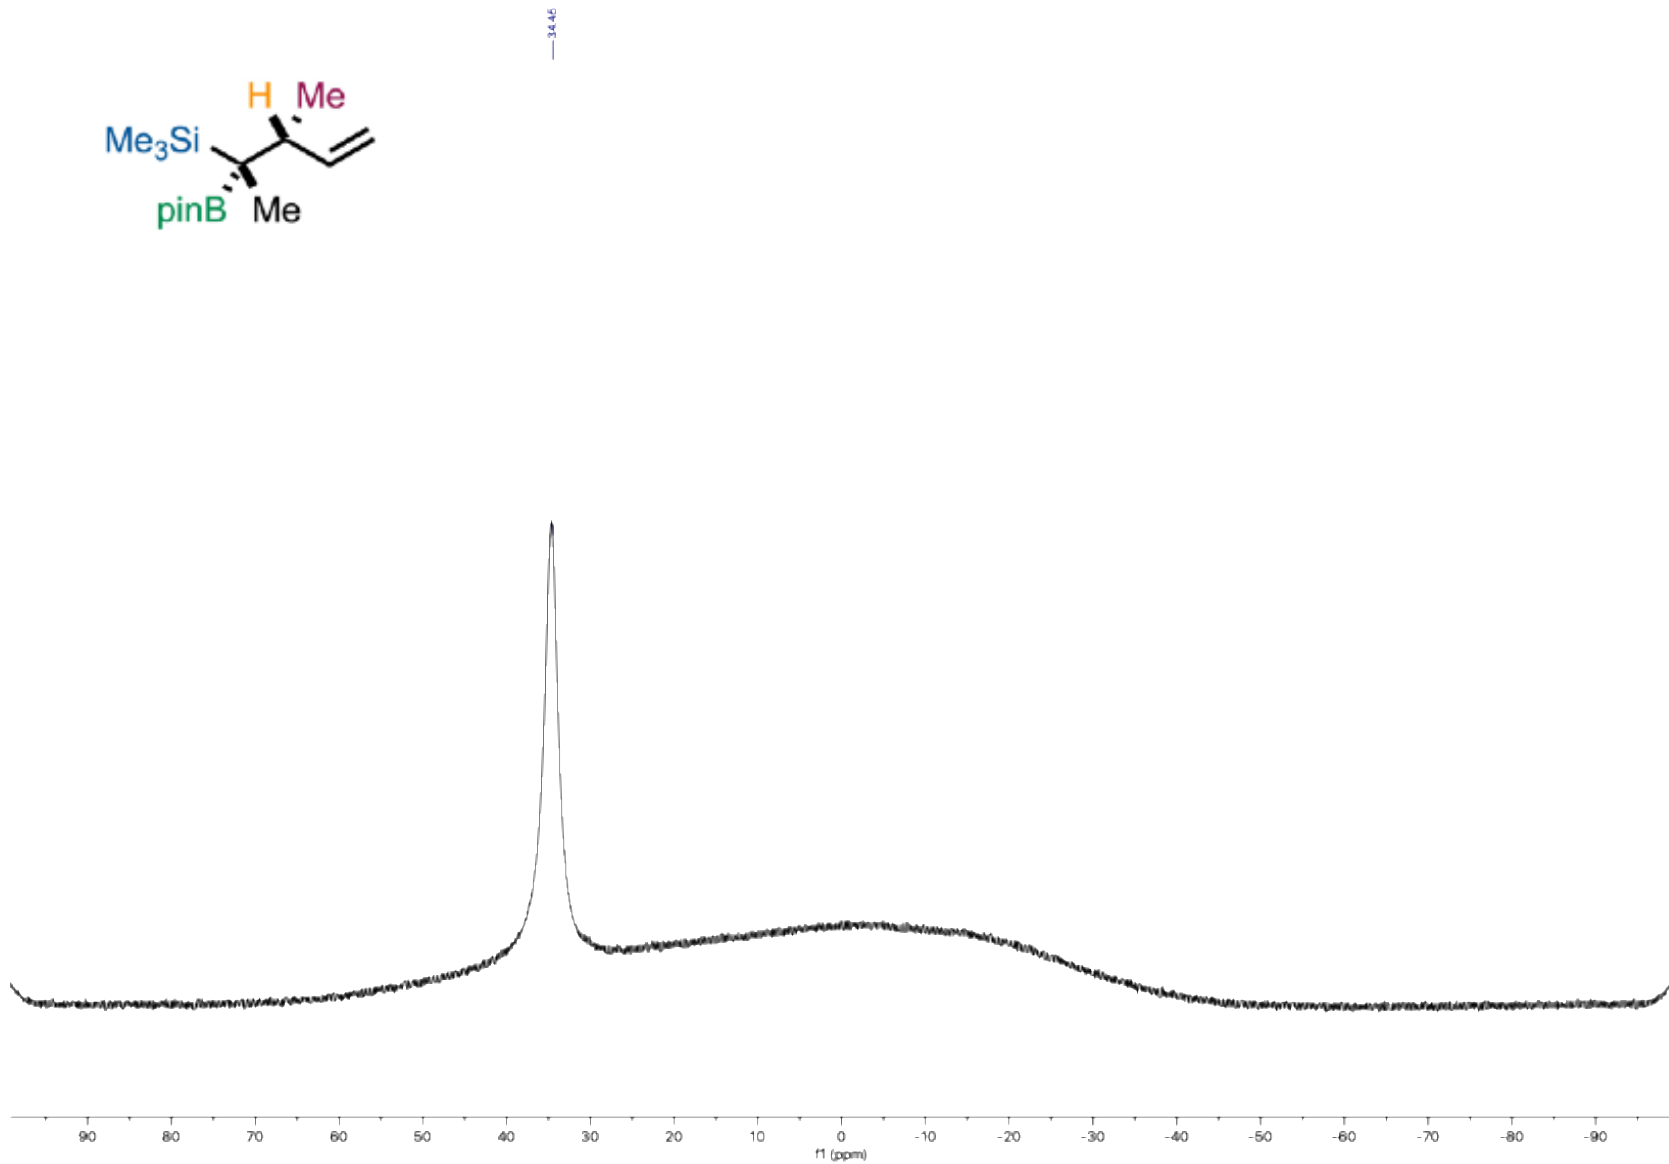

<sup>11</sup>B NMR spectrum (128 MHz, CDCl<sub>3</sub>)

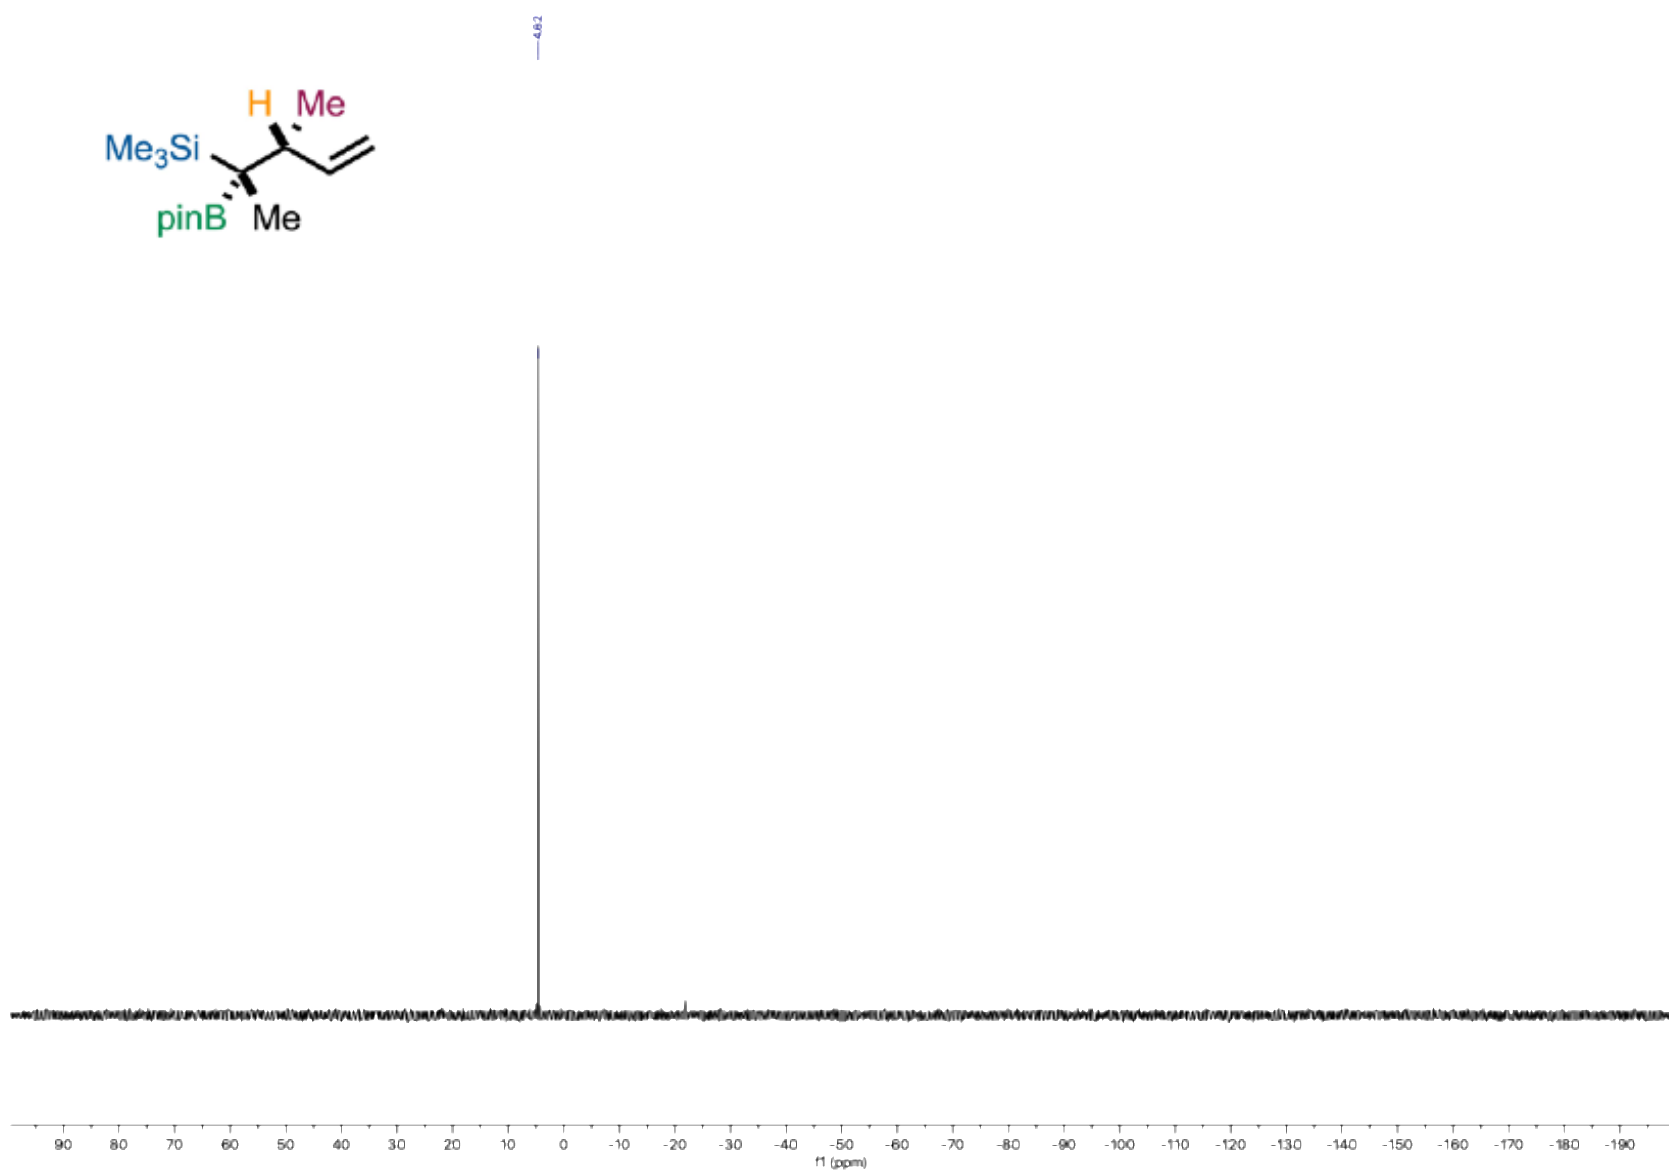

<sup>29</sup>Si NMR spectrum (80 MHz, CDCl<sub>3</sub>)

Trimethyl((2*R*\*,3*R*\*)-3-methyl-2-(4,4,5,5-tetramethyl-1,3,2-dioxaborolan-2-yl)pent-4-en-2-yl)silane (**6b**)

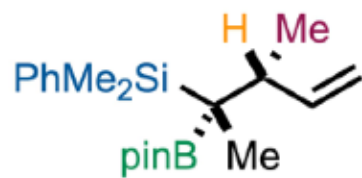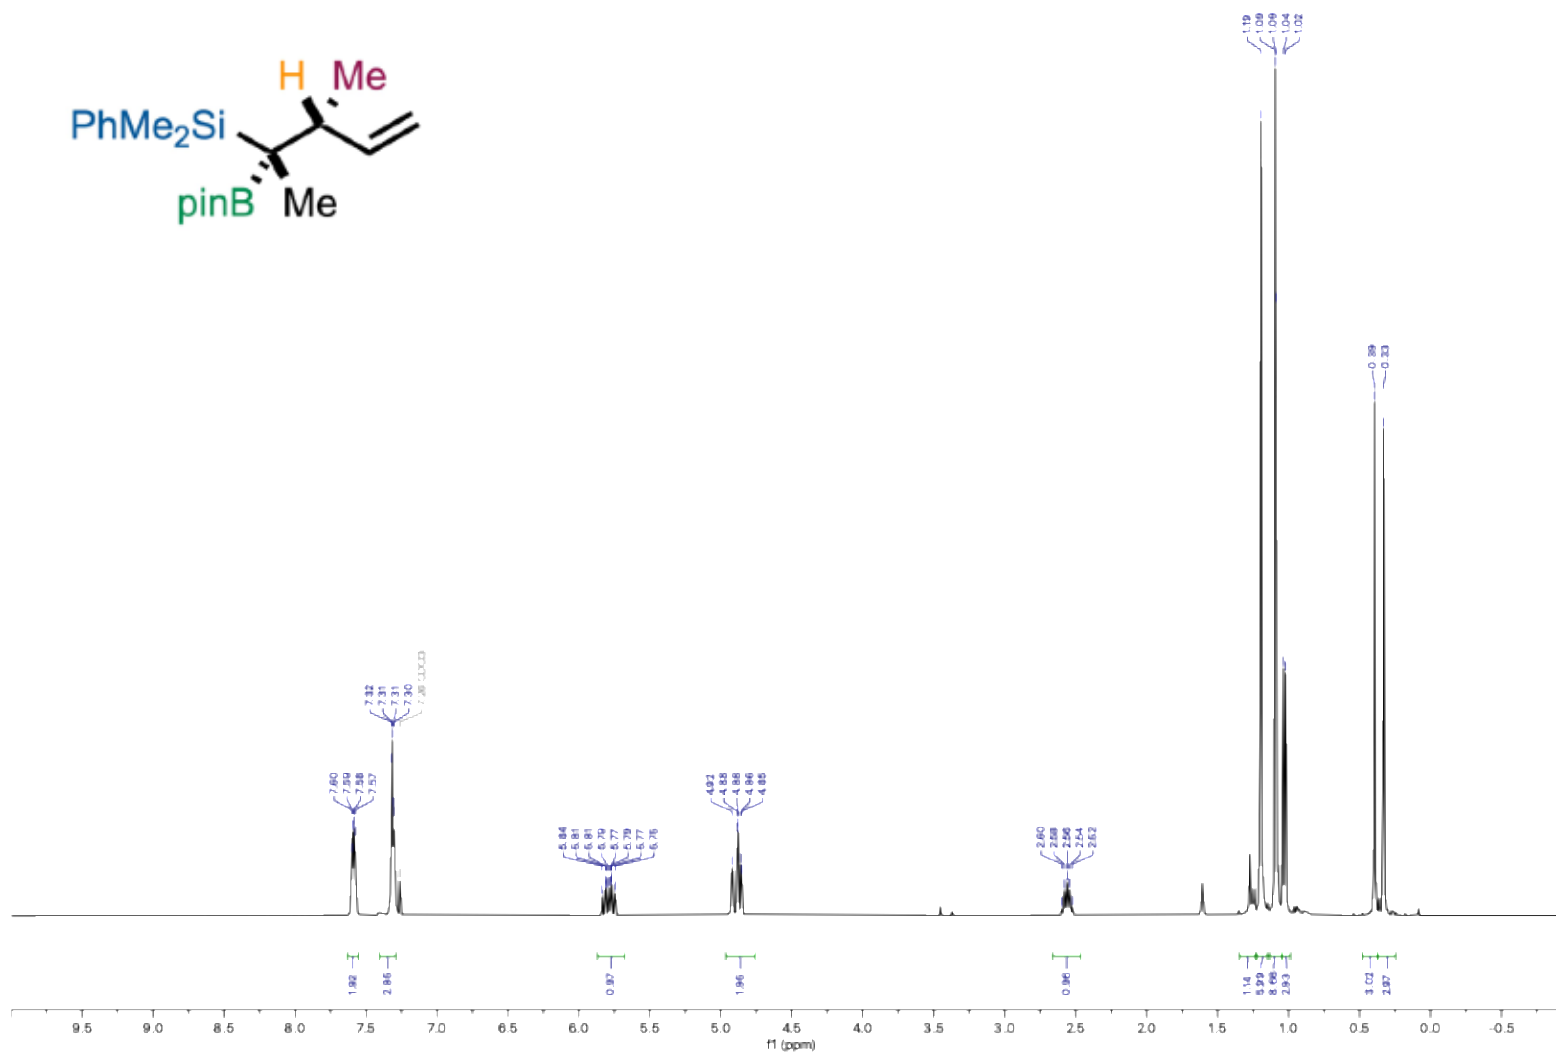

<sup>1</sup>H NMR spectrum (400 MHz, CDCl<sub>3</sub>)

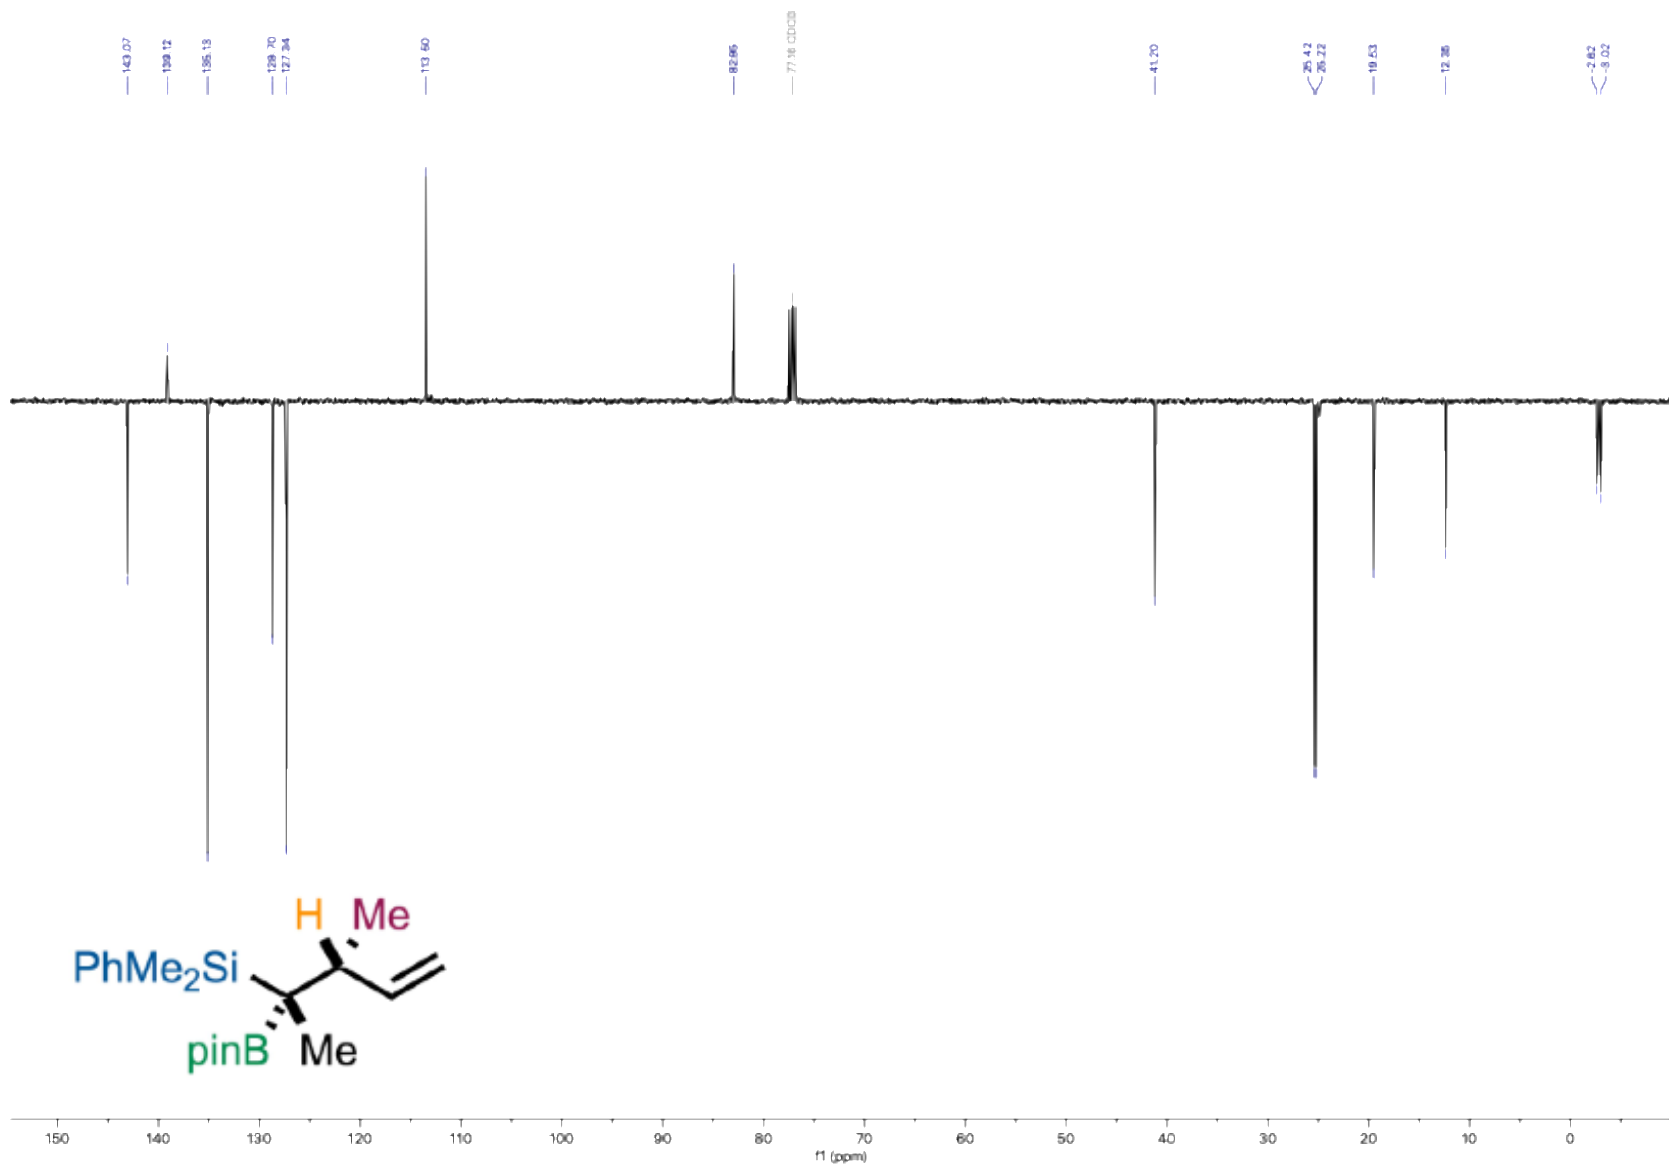

<sup>13</sup>C NMR spectrum (101 MHz, CDCl<sub>3</sub>)

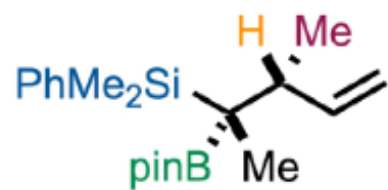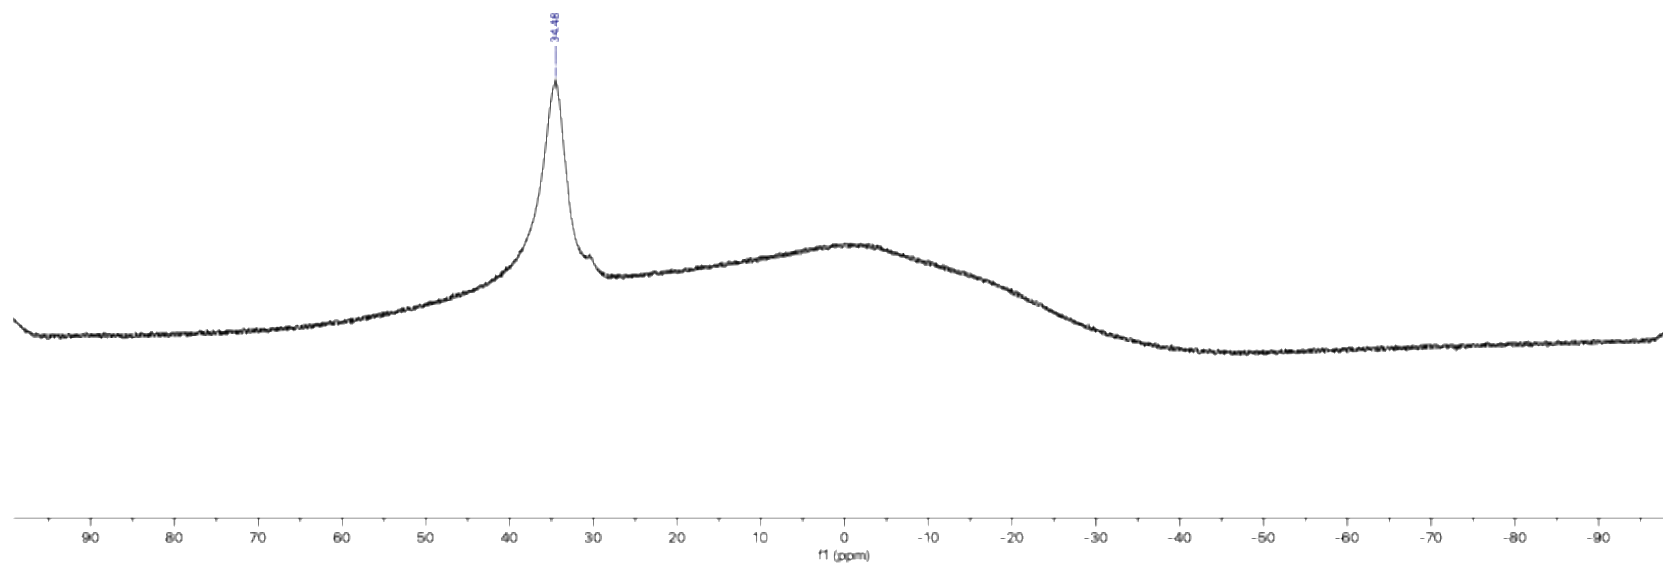

<sup>11</sup>B NMR spectrum (128 MHz, CDCl<sub>3</sub>)

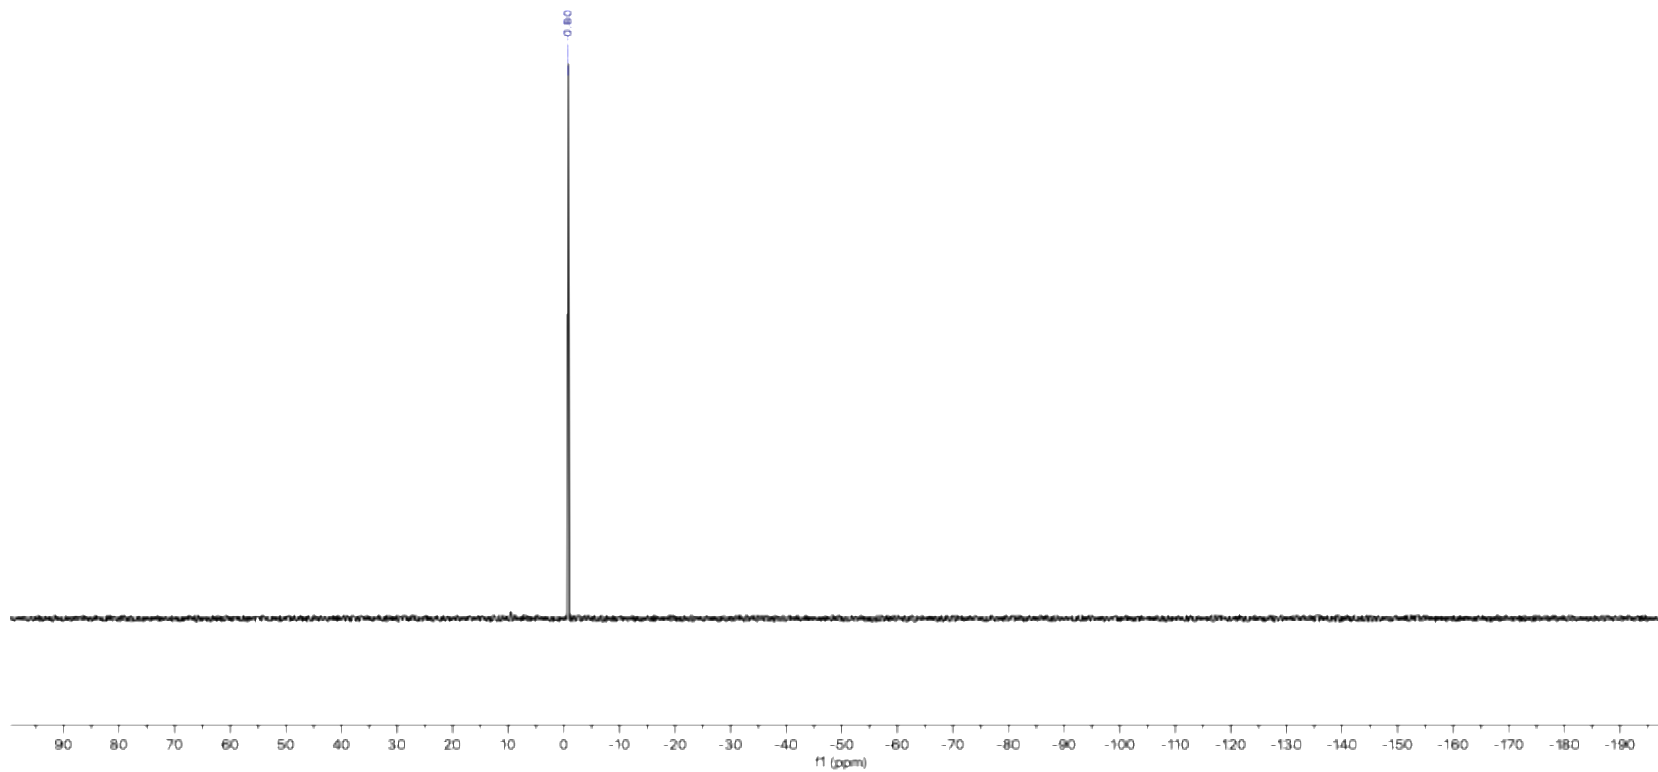

$^{29}\text{Si}$  NMR spectrum (80 MHz,  $\text{CDCl}_3$ )

Trimethyl((2*S*\*,3*S*\*)-2-(4,4,5,5-tetramethyl-1,3,2-dioxaborolan-2-yl)-3-vinylhex-5-en-2-yl)silane (**6c**)

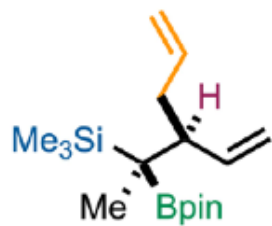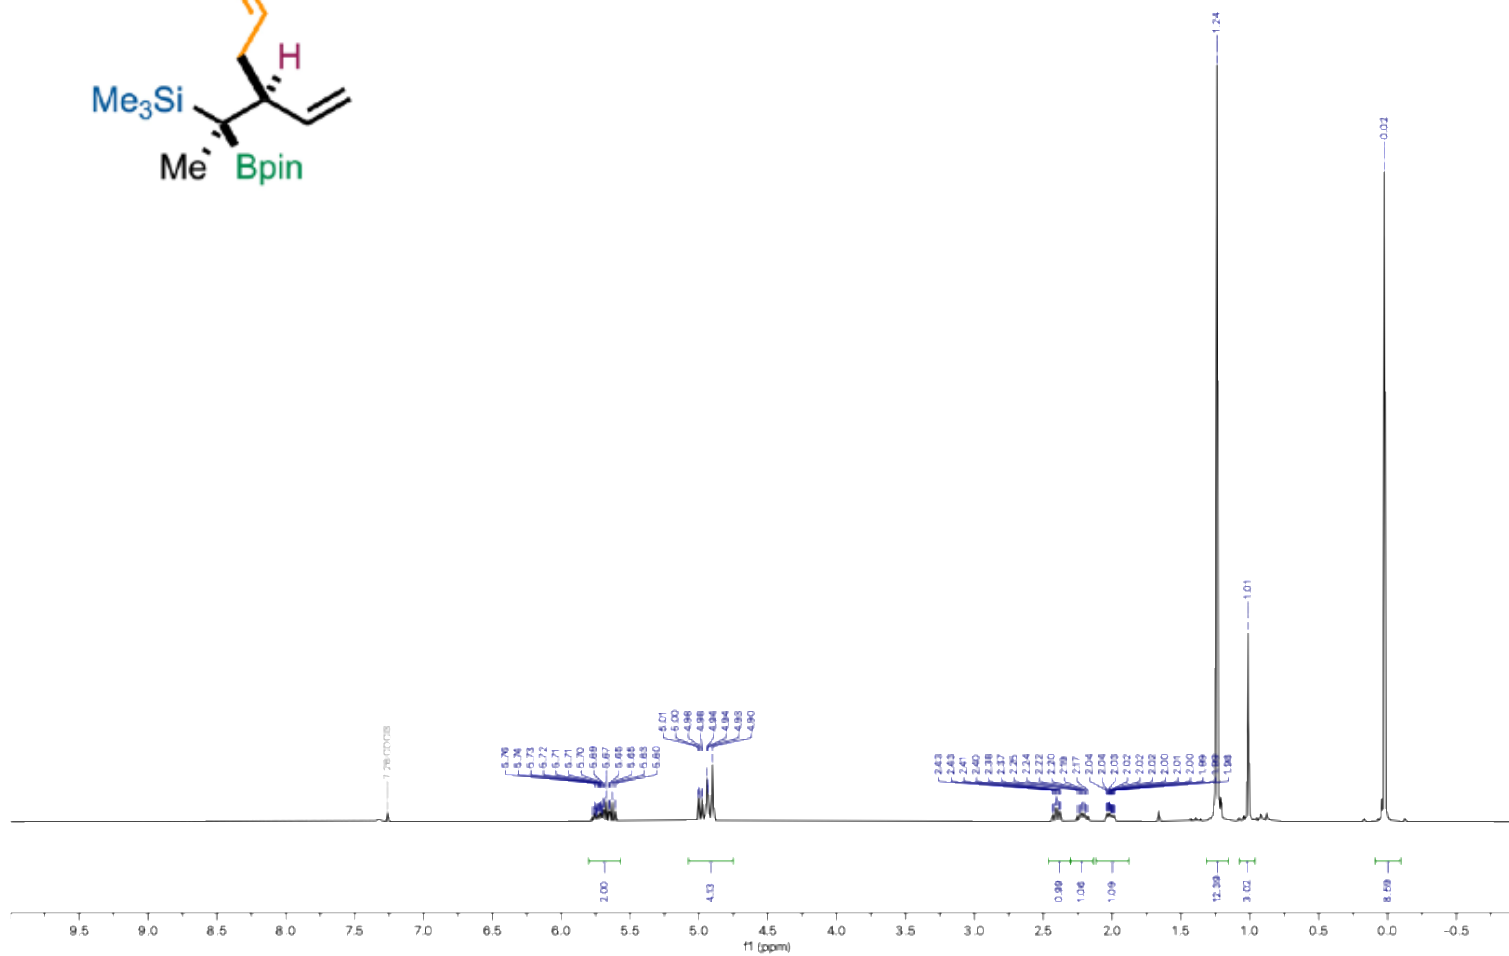

<sup>1</sup>H NMR spectrum (400 MHz, CDCl<sub>3</sub>)

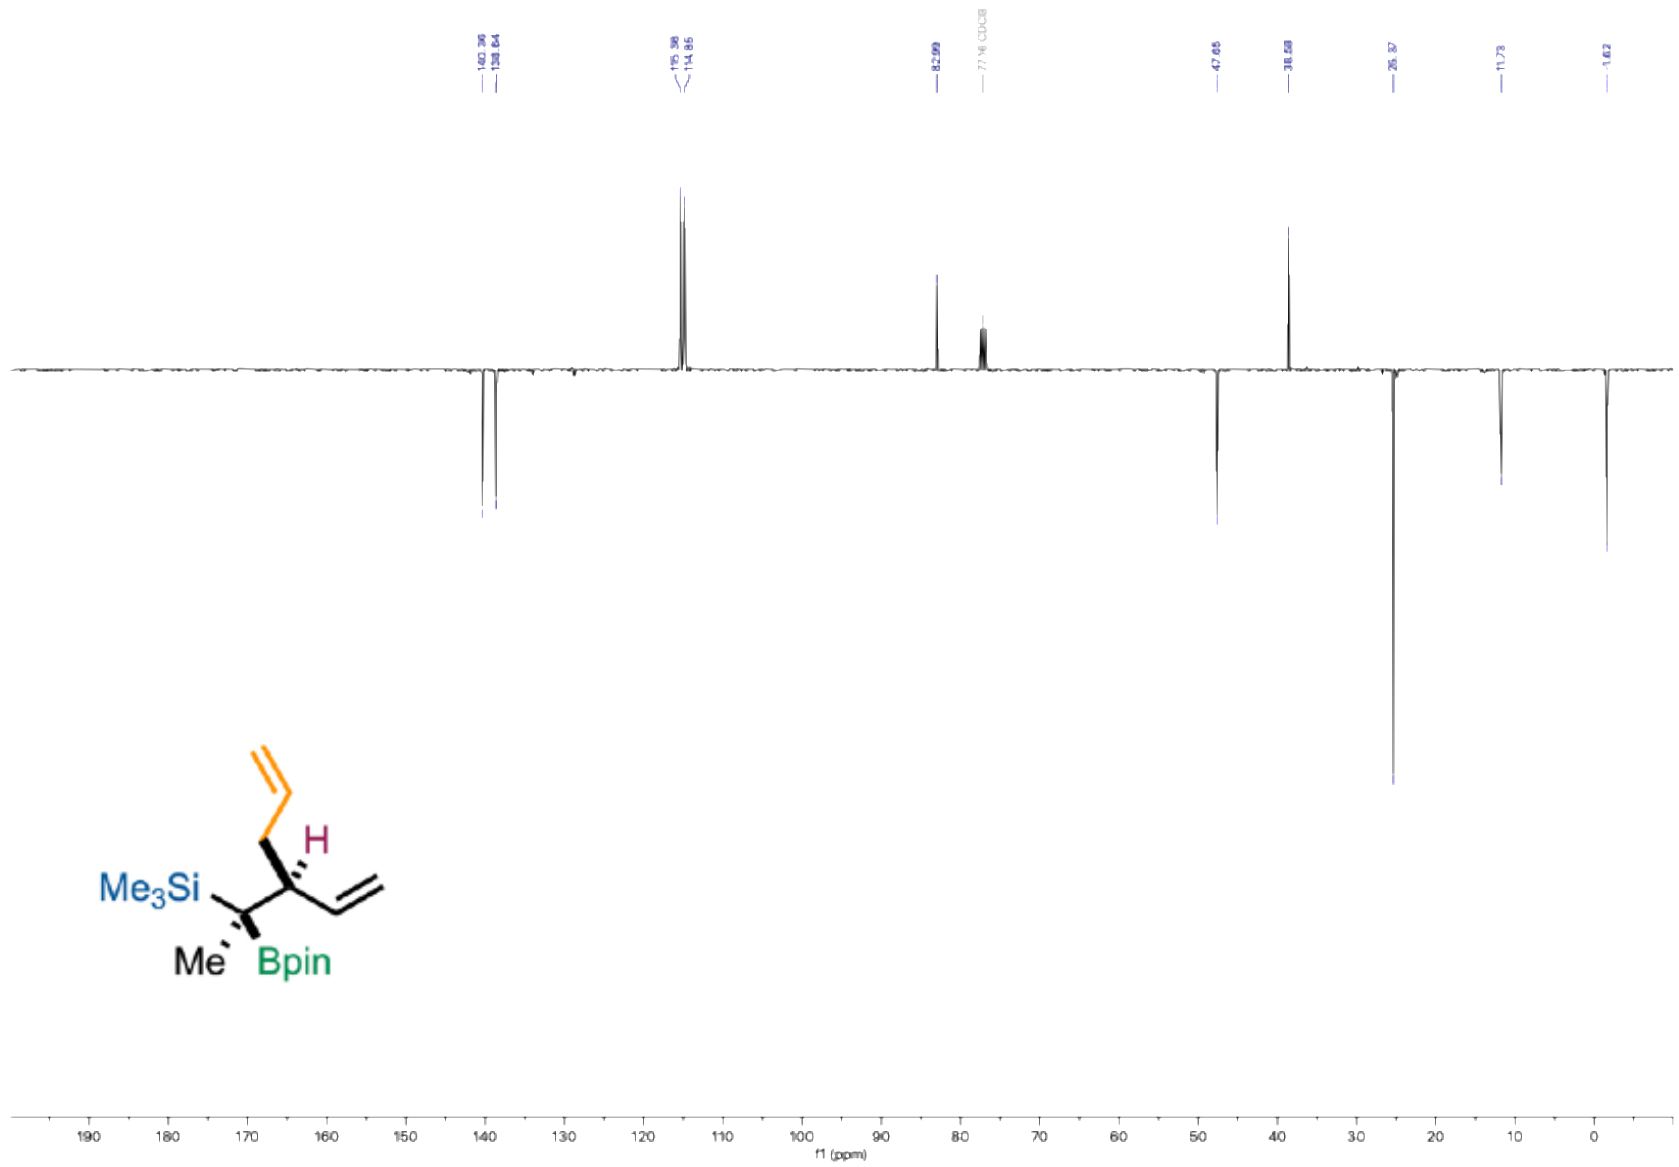

$^{13}\text{C}$  NMR spectrum (101 MHz,  $\text{CDCl}_3$ )

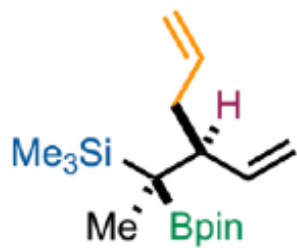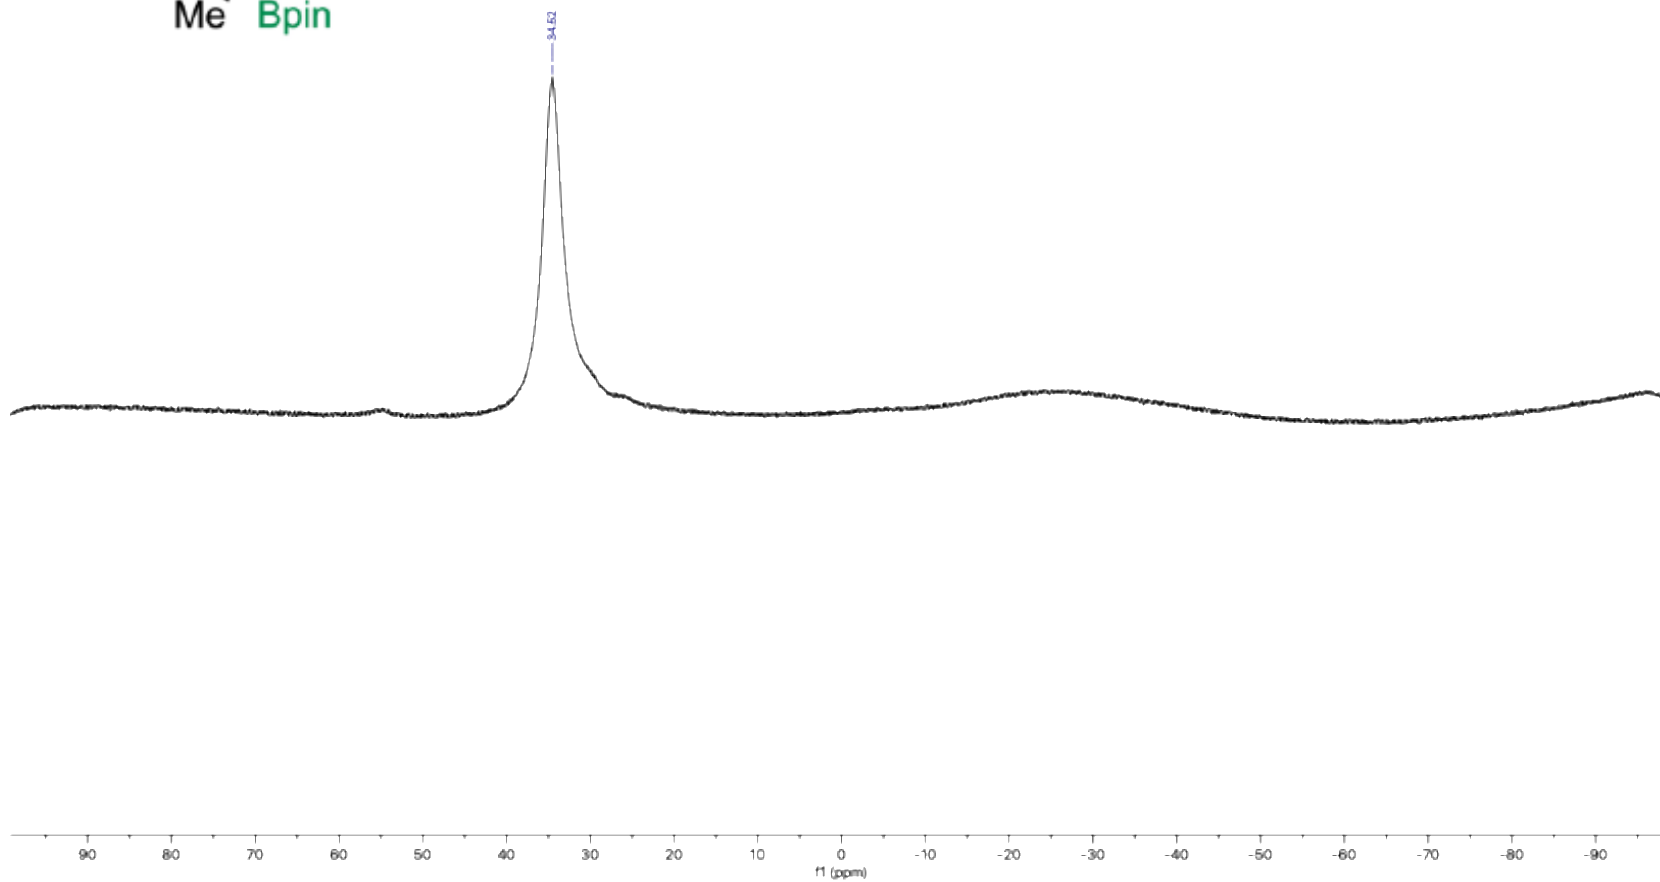

<sup>11</sup>B NMR spectrum (128 MHz, CDCl<sub>3</sub>)

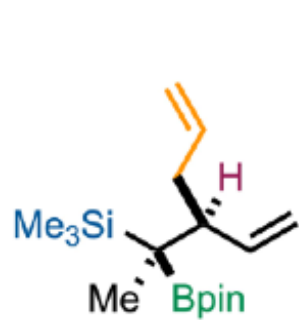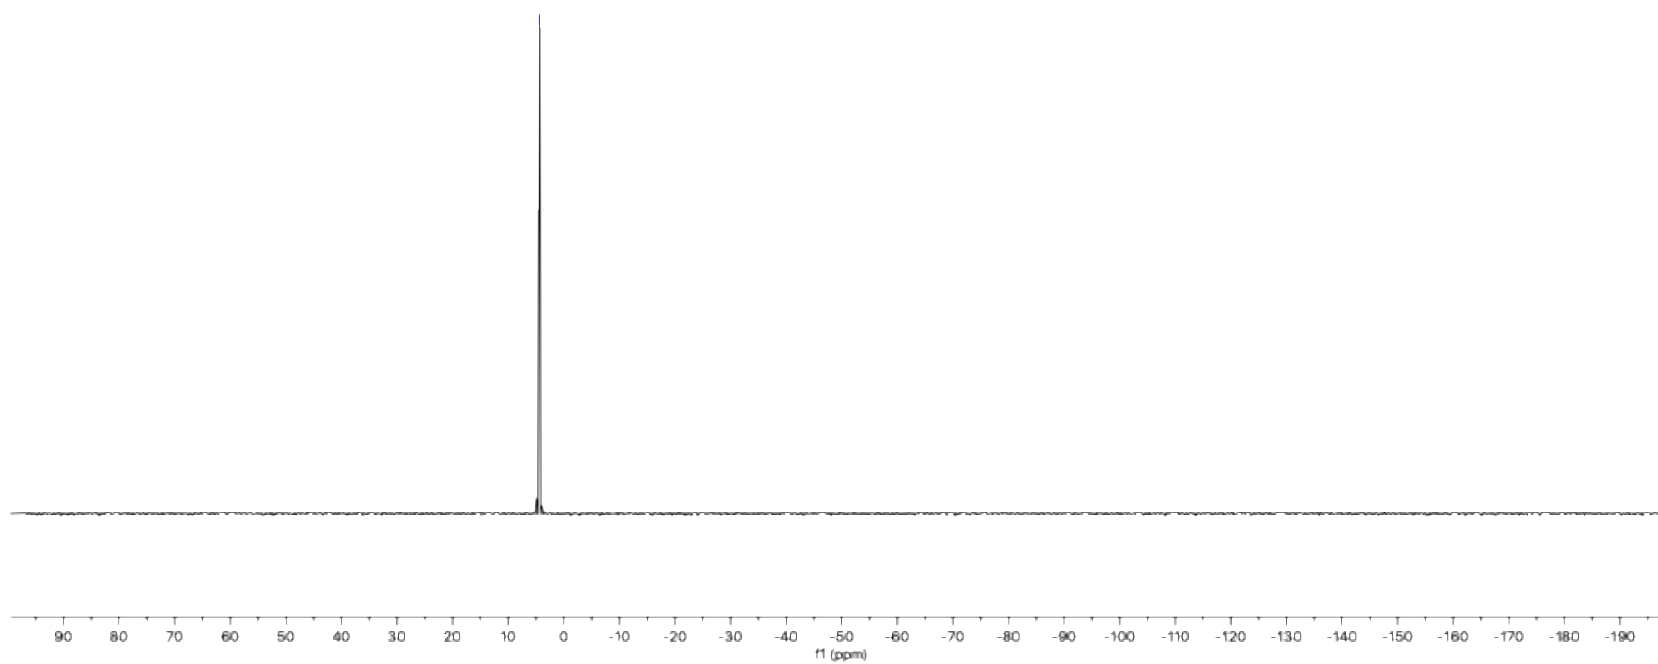

$^{29}\text{Si}$  NMR spectrum (80 MHz,  $\text{CDCl}_3$ )

Trimethyl((4*R*\*,5*R*\*)-4-(4,4,5,5-tetramethyl-1,3,2-dioxaborolan-2-yl)-5-vinyloctan-4-yl)silane (**6d**)

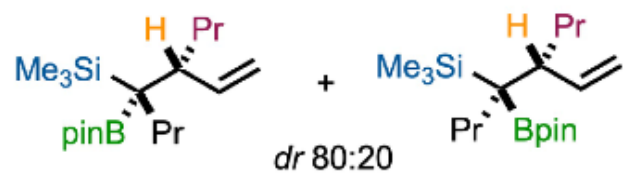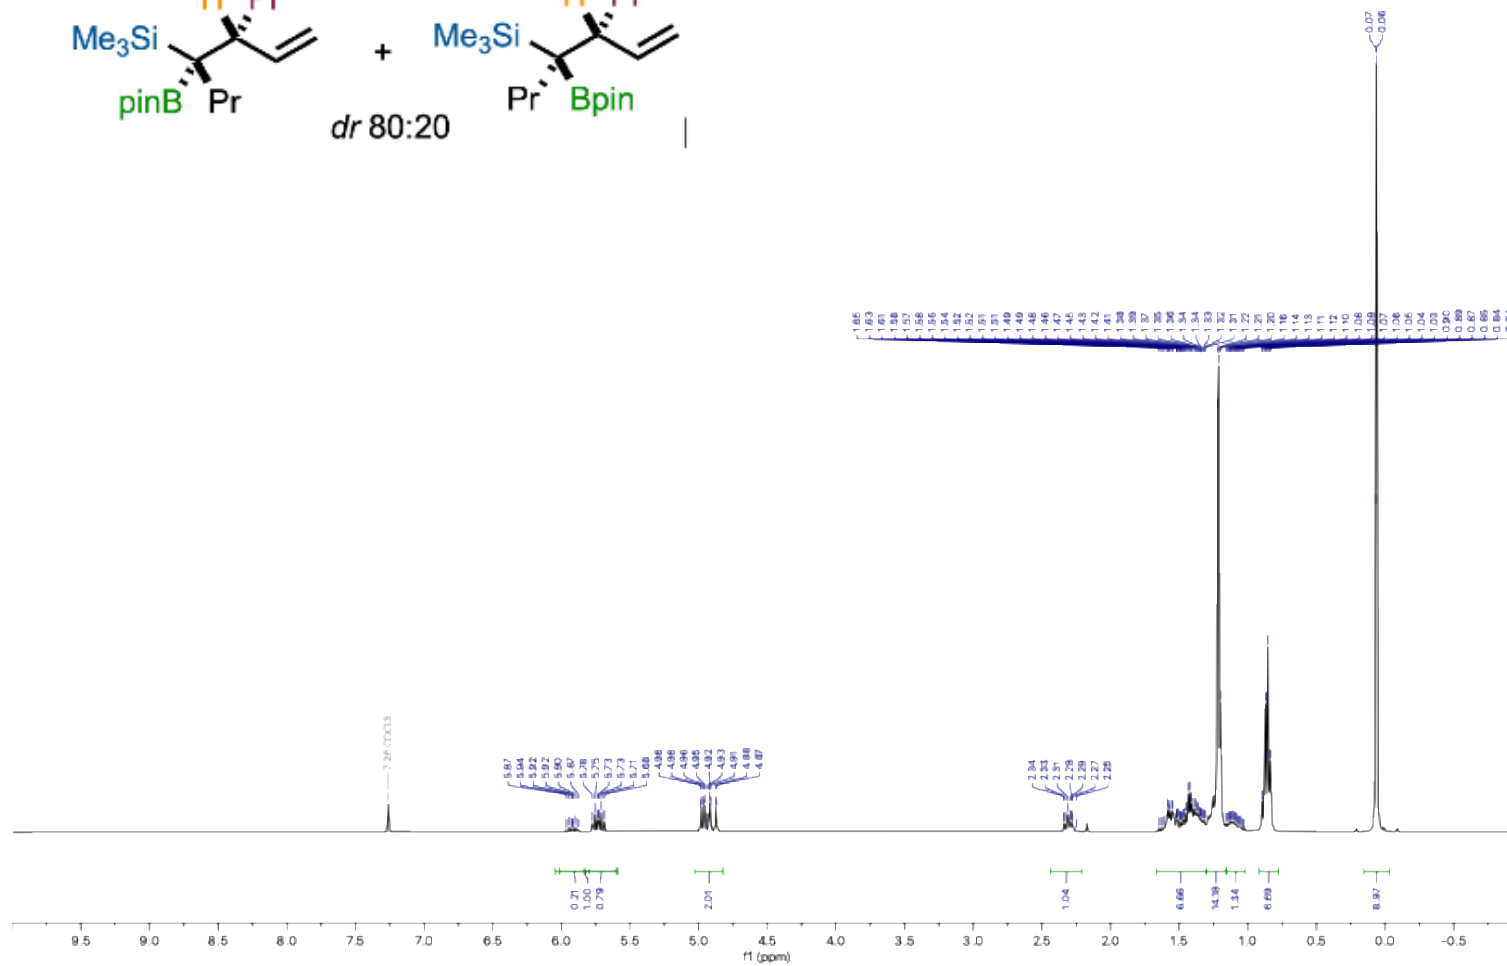

<sup>1</sup>H NMR spectrum (400 MHz, CDCl<sub>3</sub>)

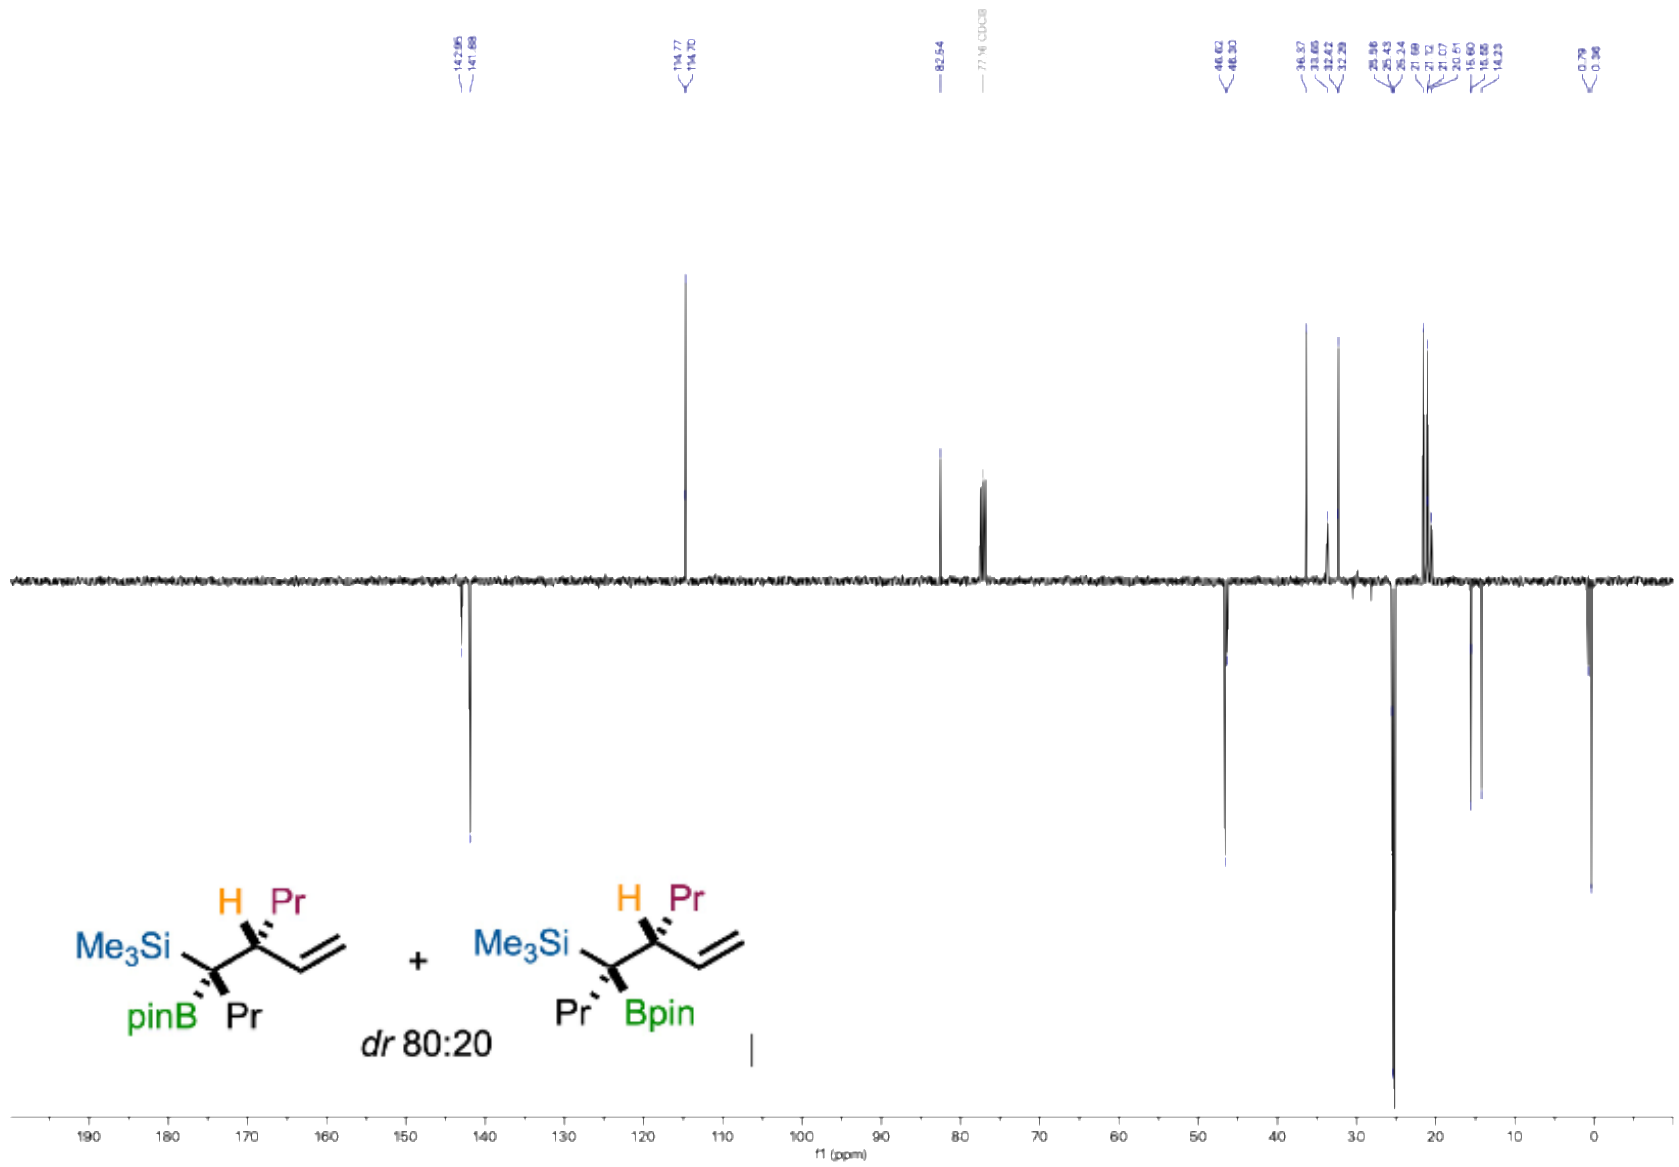

<sup>13</sup>C NMR spectrum (101 MHz, CDCl<sub>3</sub>)

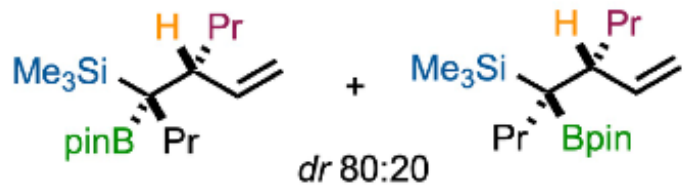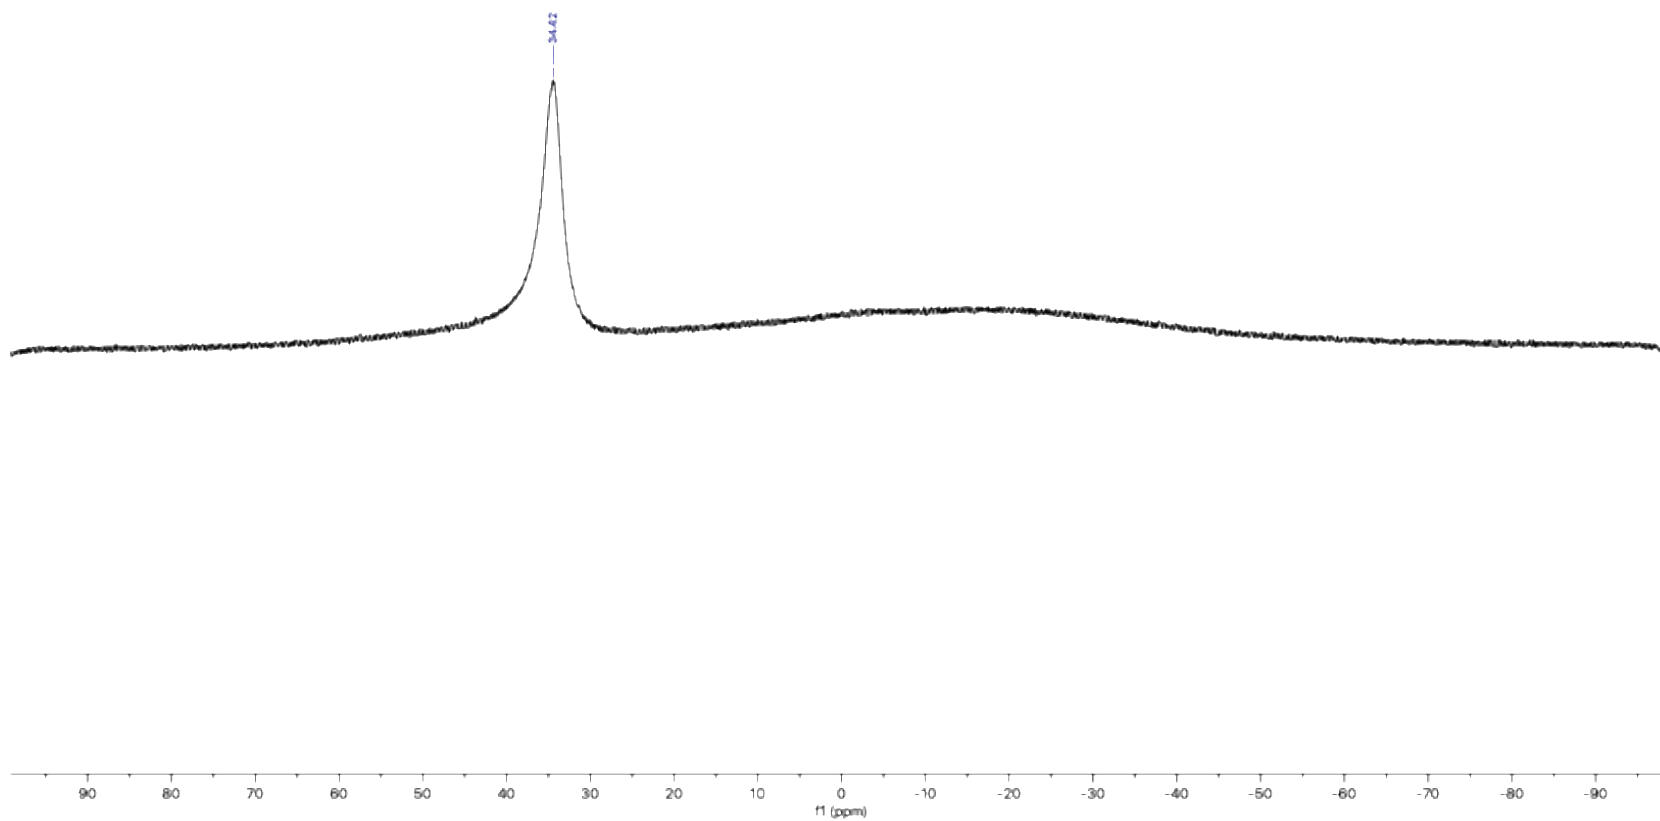

$^{11}\text{B}$  NMR spectrum (128 MHz,  $\text{CDCl}_3$ )

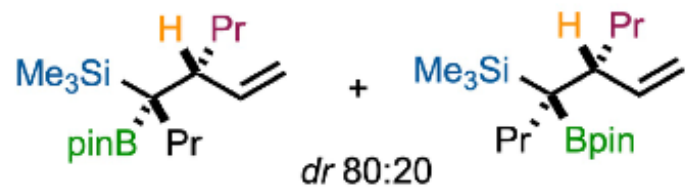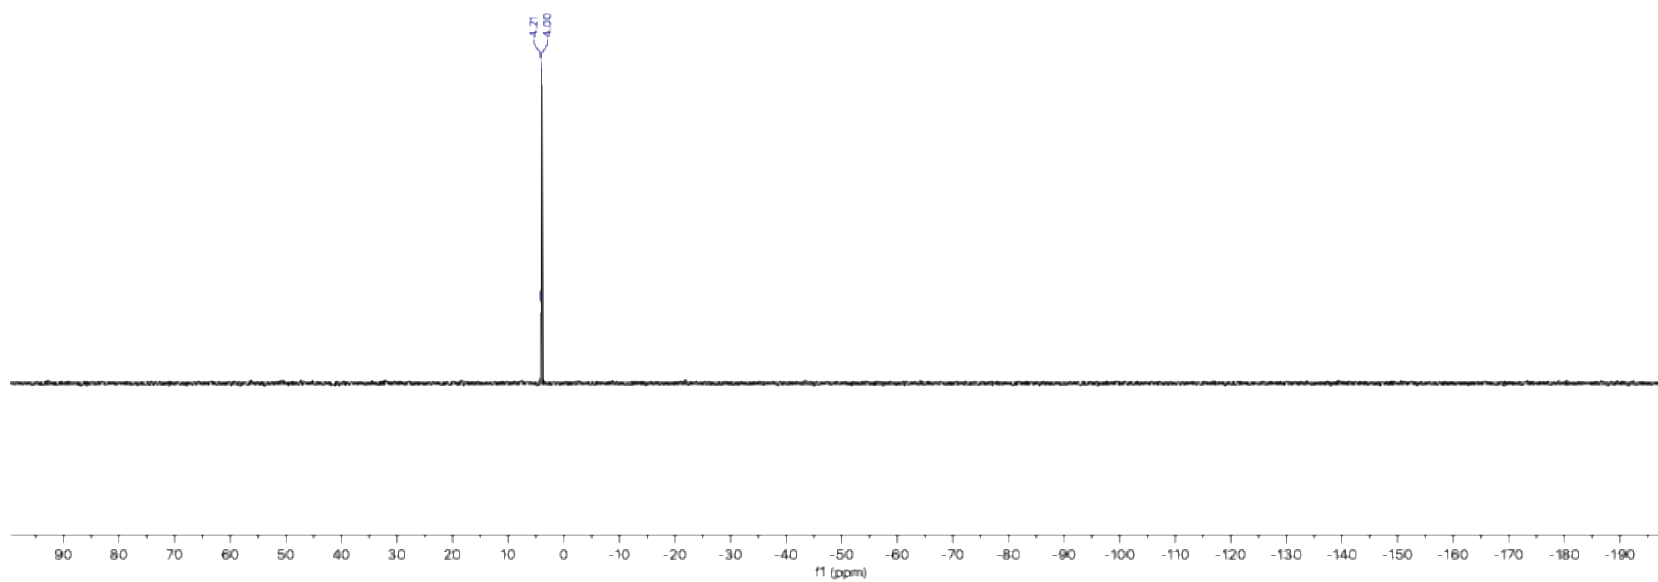

$^{29}\text{Si}$  NMR spectrum (80 MHz,  $\text{CDCl}_3$ )

**((3*R*\*,4*R*\*)-4-Ethyl-3-(4,4,5,5-tetramethyl-1,3,2-dioxaborolan-2-yl)hex-5-en-3-yl)trimethylsilane (6e)**

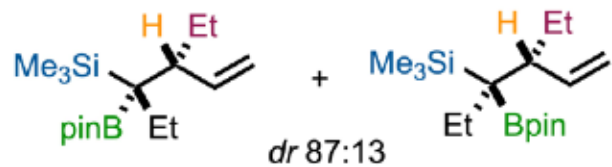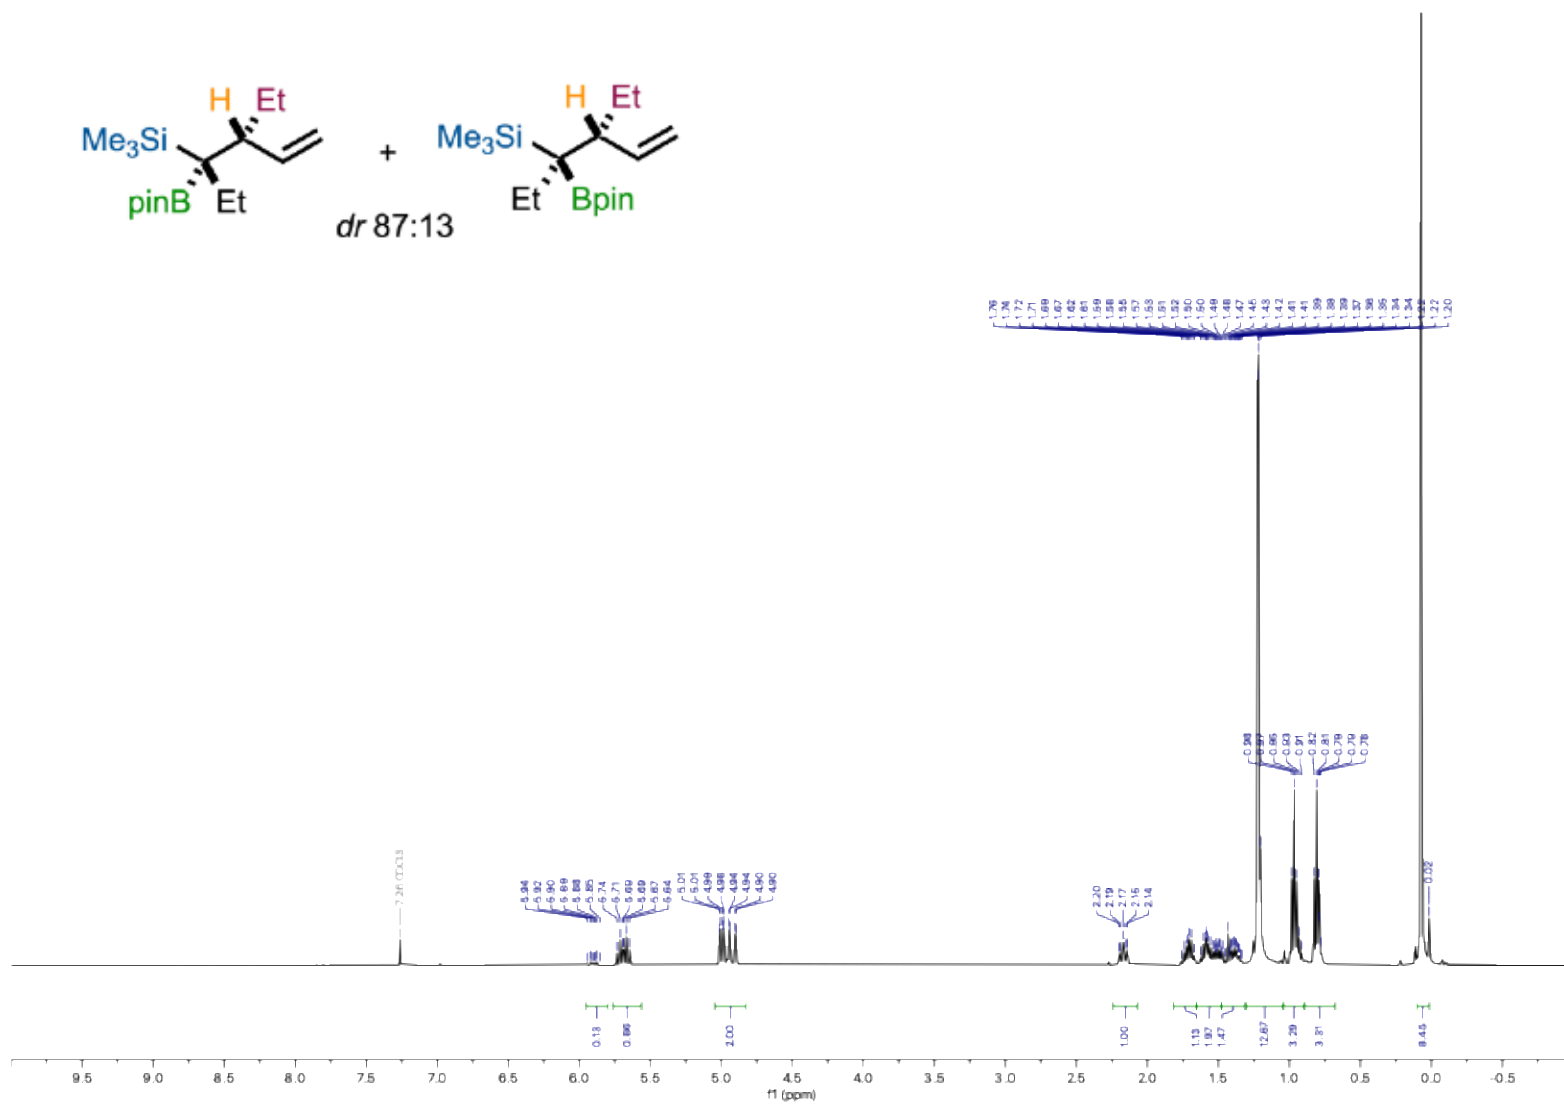

<sup>1</sup>H NMR spectrum (400 MHz, CDCl<sub>3</sub>)

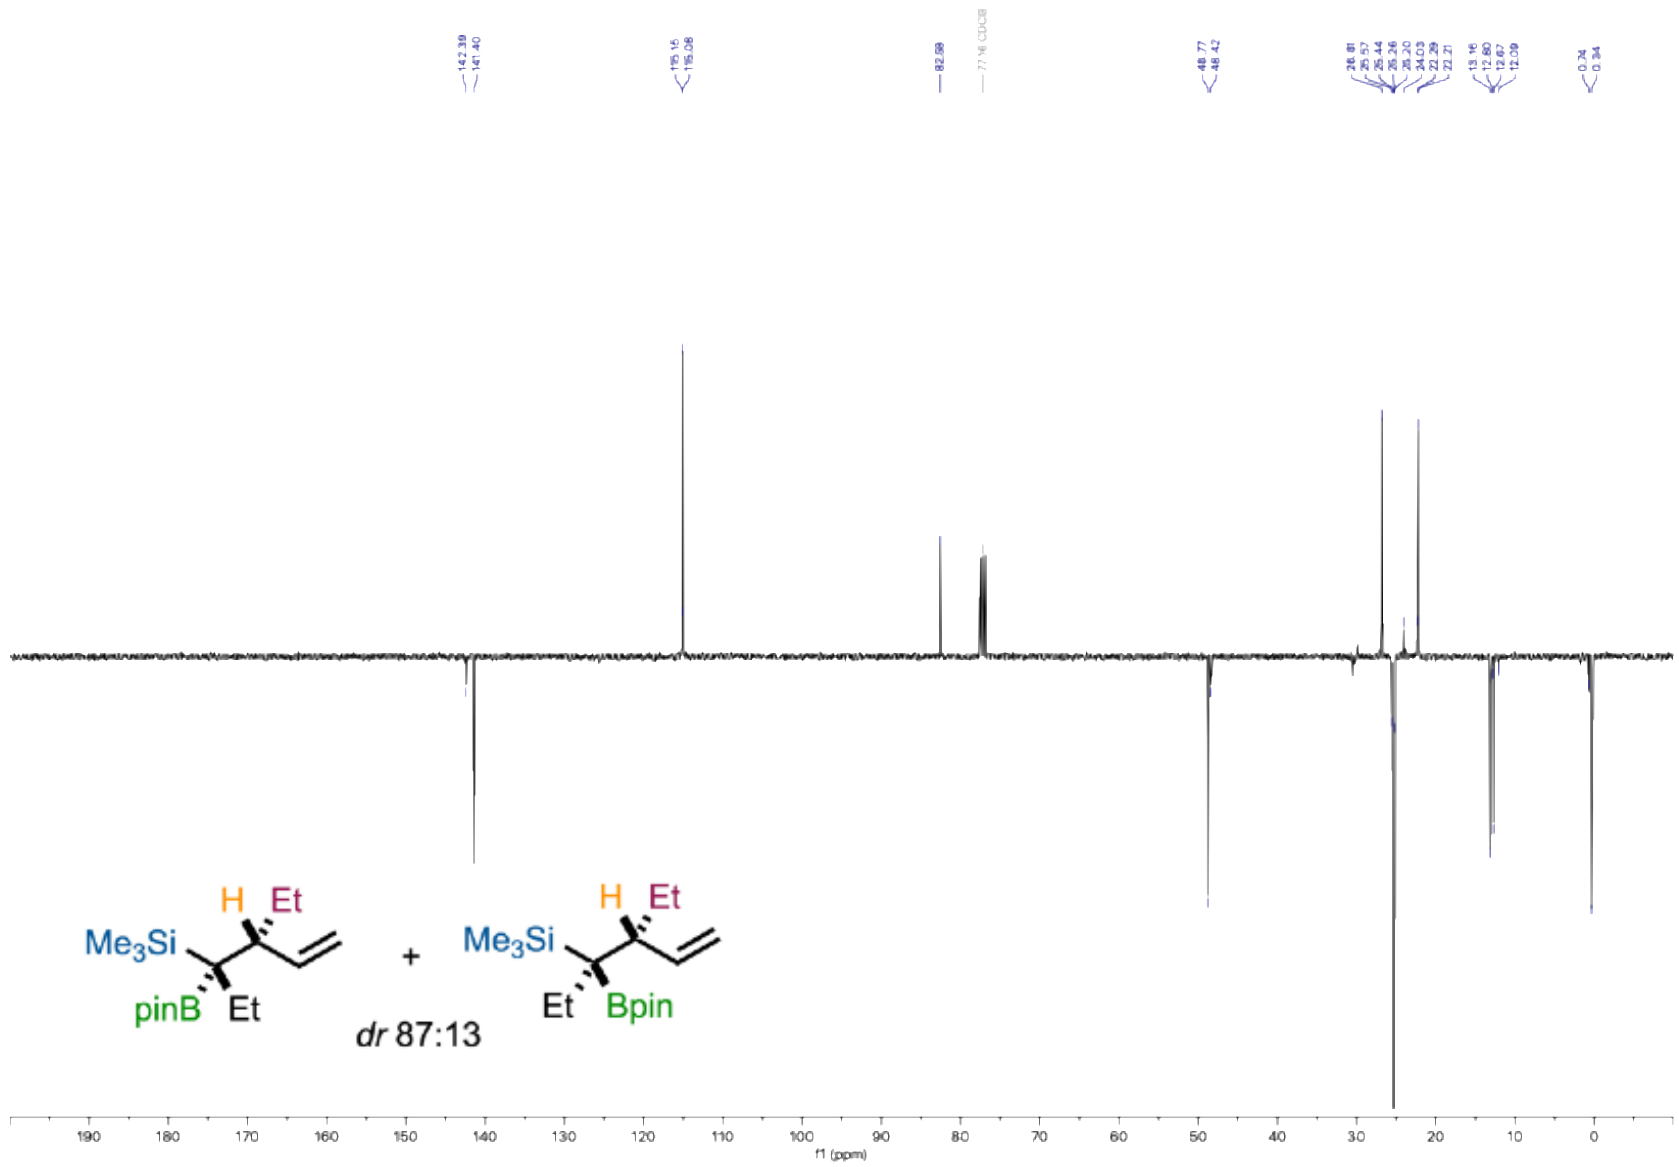

<sup>13</sup>C NMR spectrum (101 MHz, CDCl<sub>3</sub>)

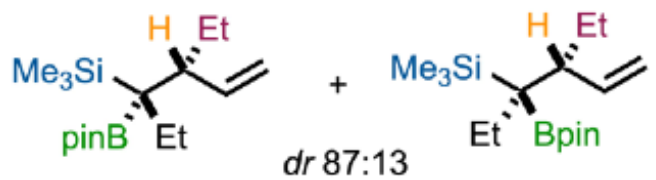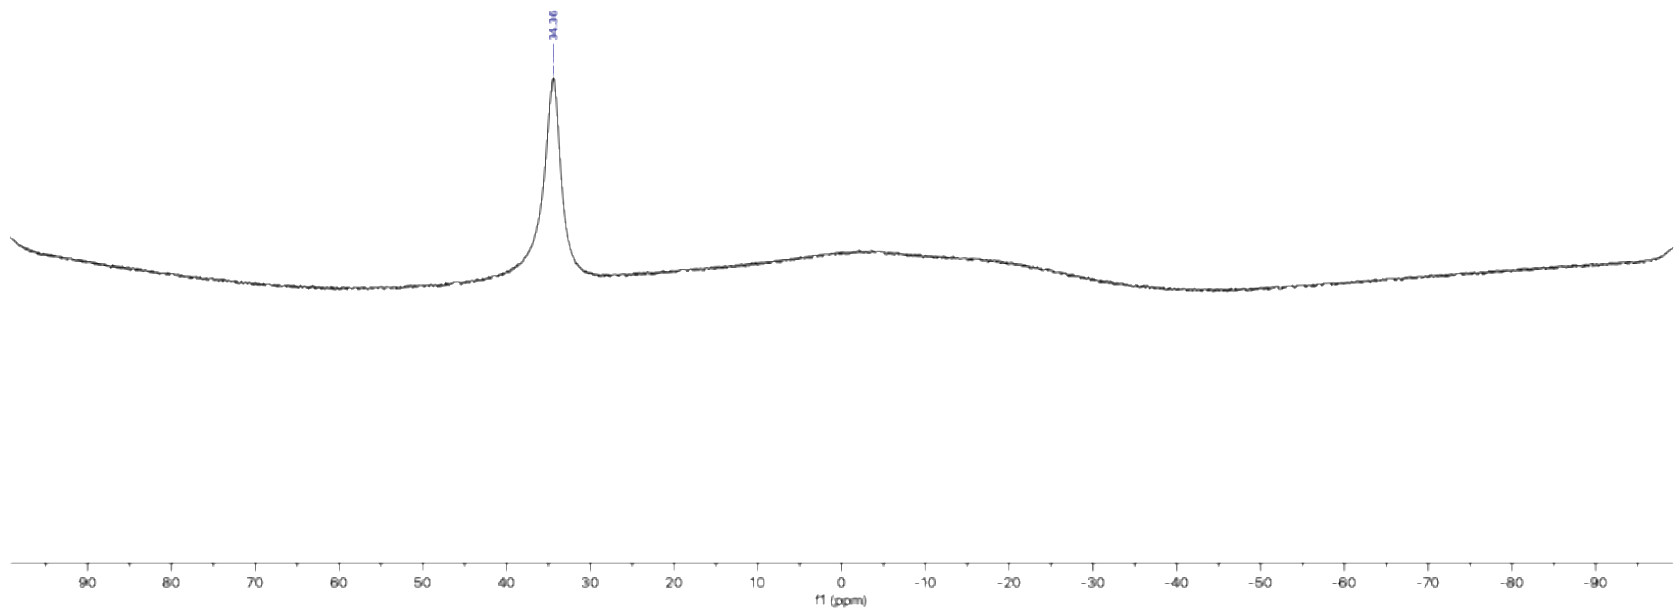

$^{11}\text{B}$  NMR spectrum (128 MHz,  $\text{CDCl}_3$ )

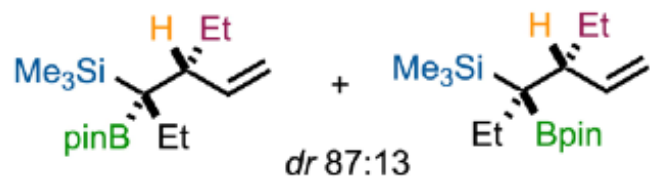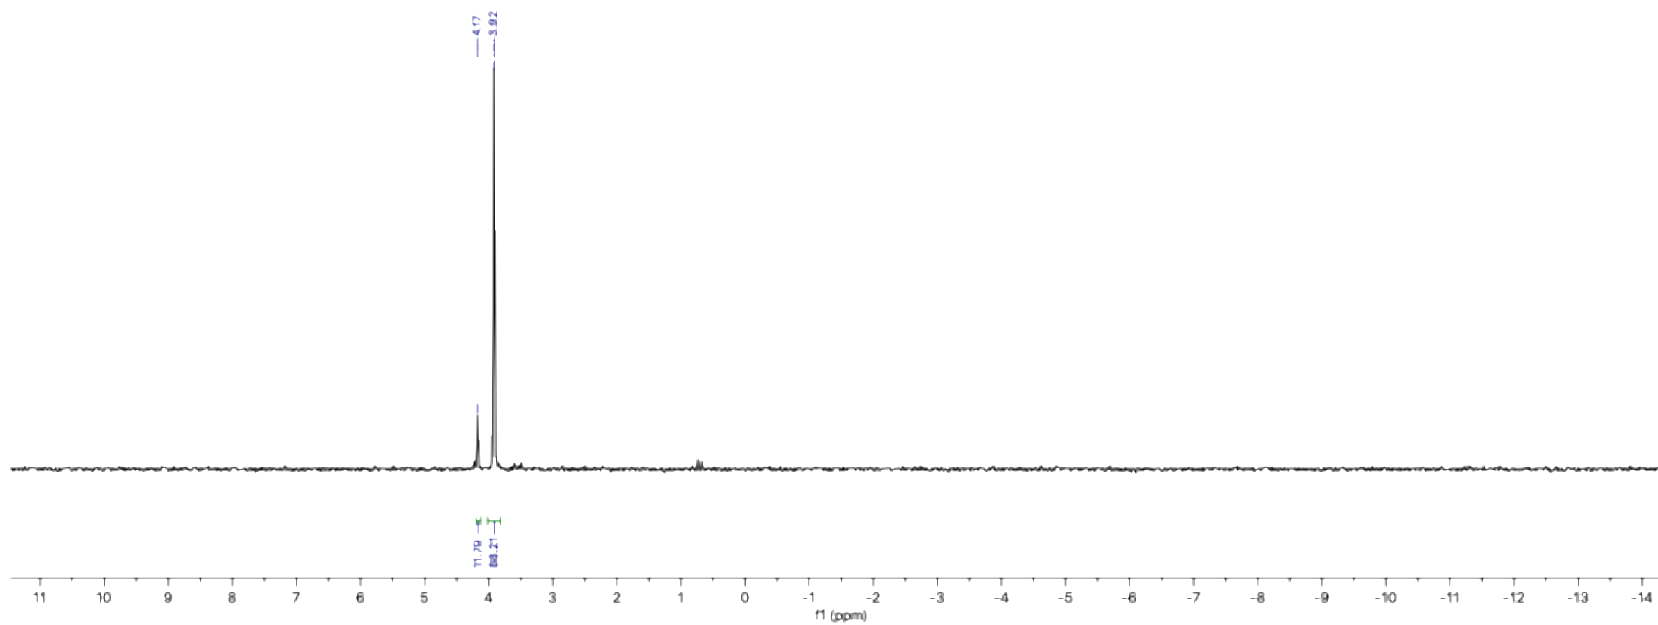

<sup>29</sup>Si NMR spectrum (80 MHz, CDCl<sub>3</sub>)



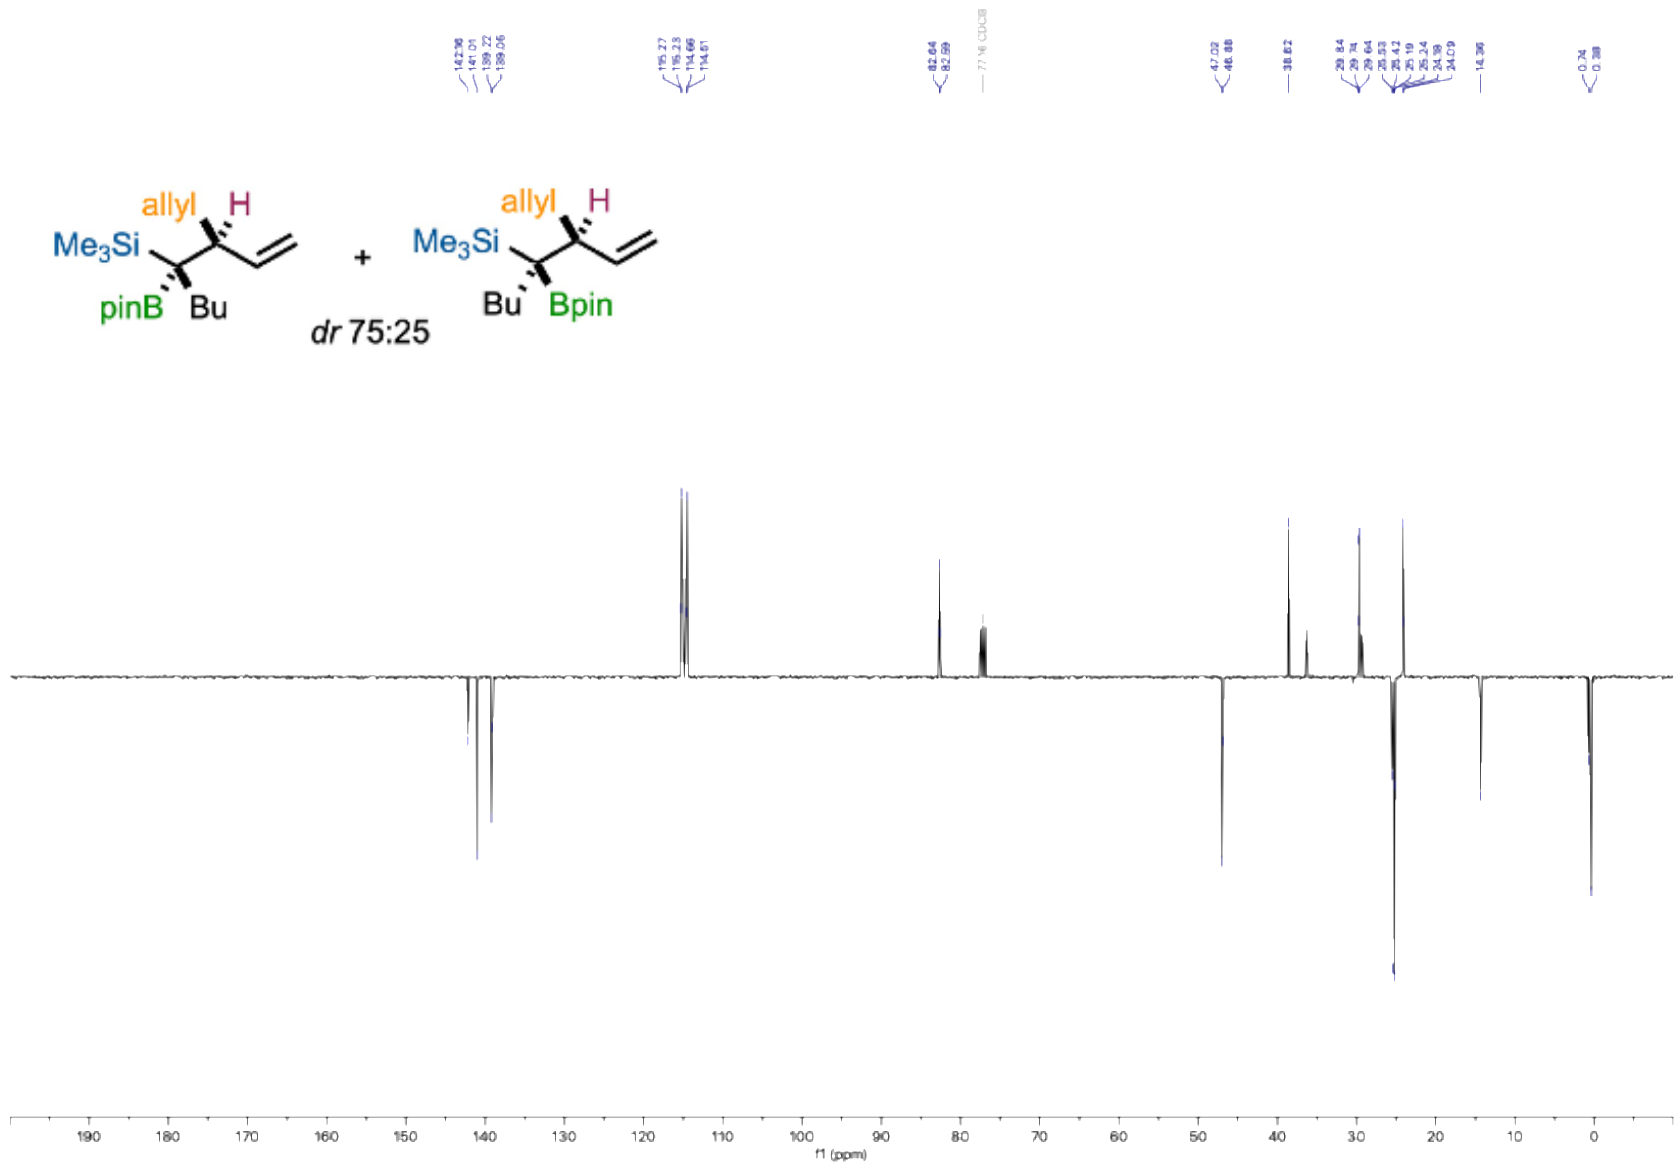

<sup>13</sup>C NMR spectrum (101 MHz, CDCl<sub>3</sub>)

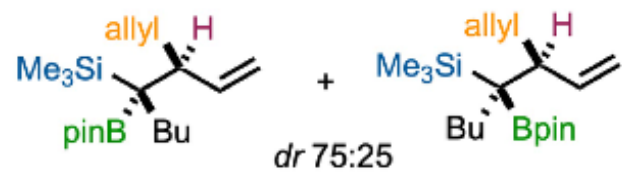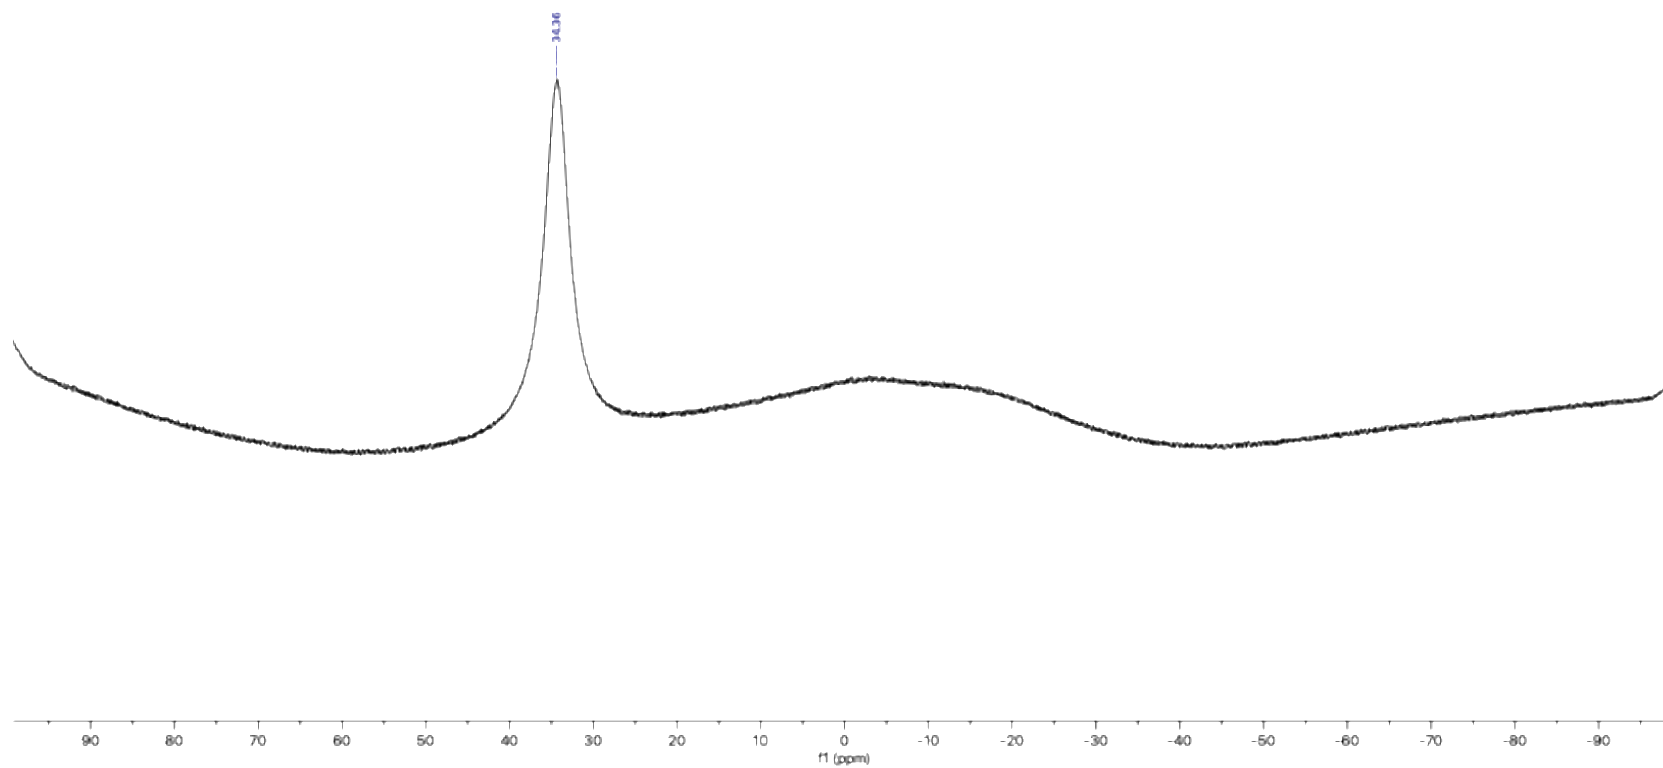

$^{11}\text{B}$  NMR spectrum (128 MHz,  $\text{CDCl}_3$ )

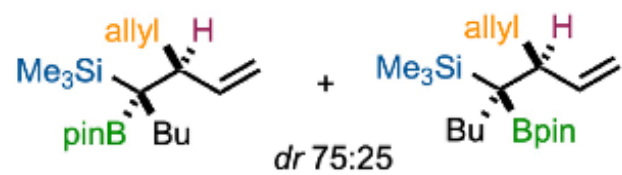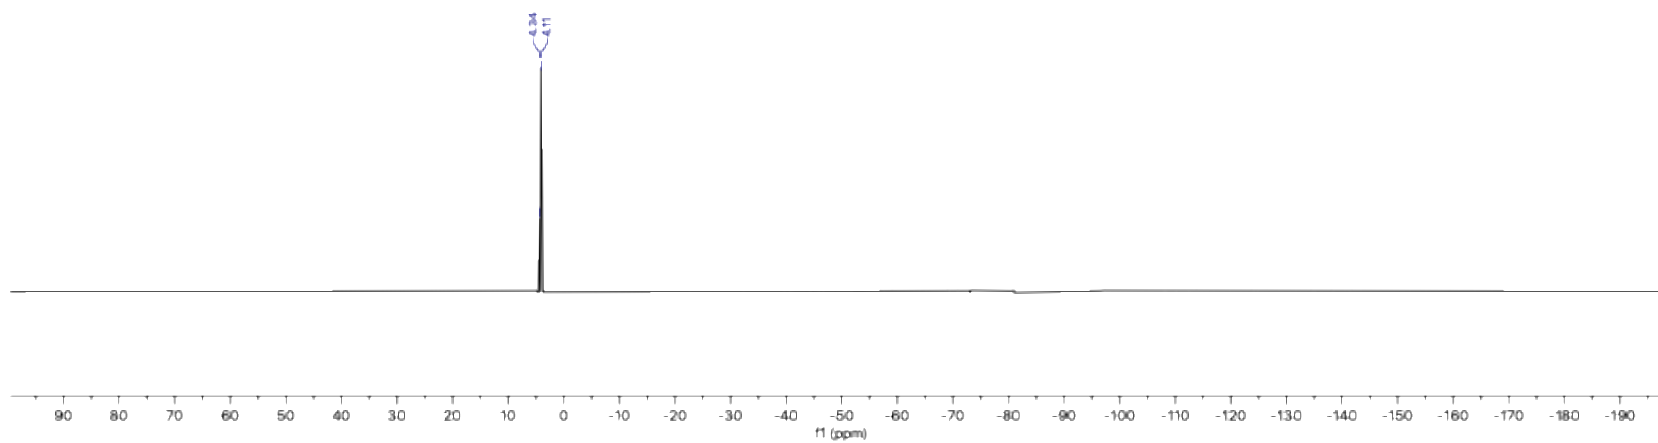

$^{29}\text{Si}$  NMR spectrum (80 MHz,  $\text{CDCl}_3$ )

**((1S\*,2S\*)-1-Cyclohexyl-1-(4,4,5,5-tetramethyl-1,3,2-dioxaborolan-2-yl)-2-vinylpentyl)trimethylsilane 6g**

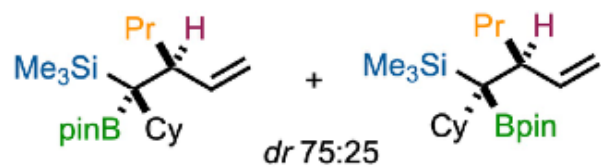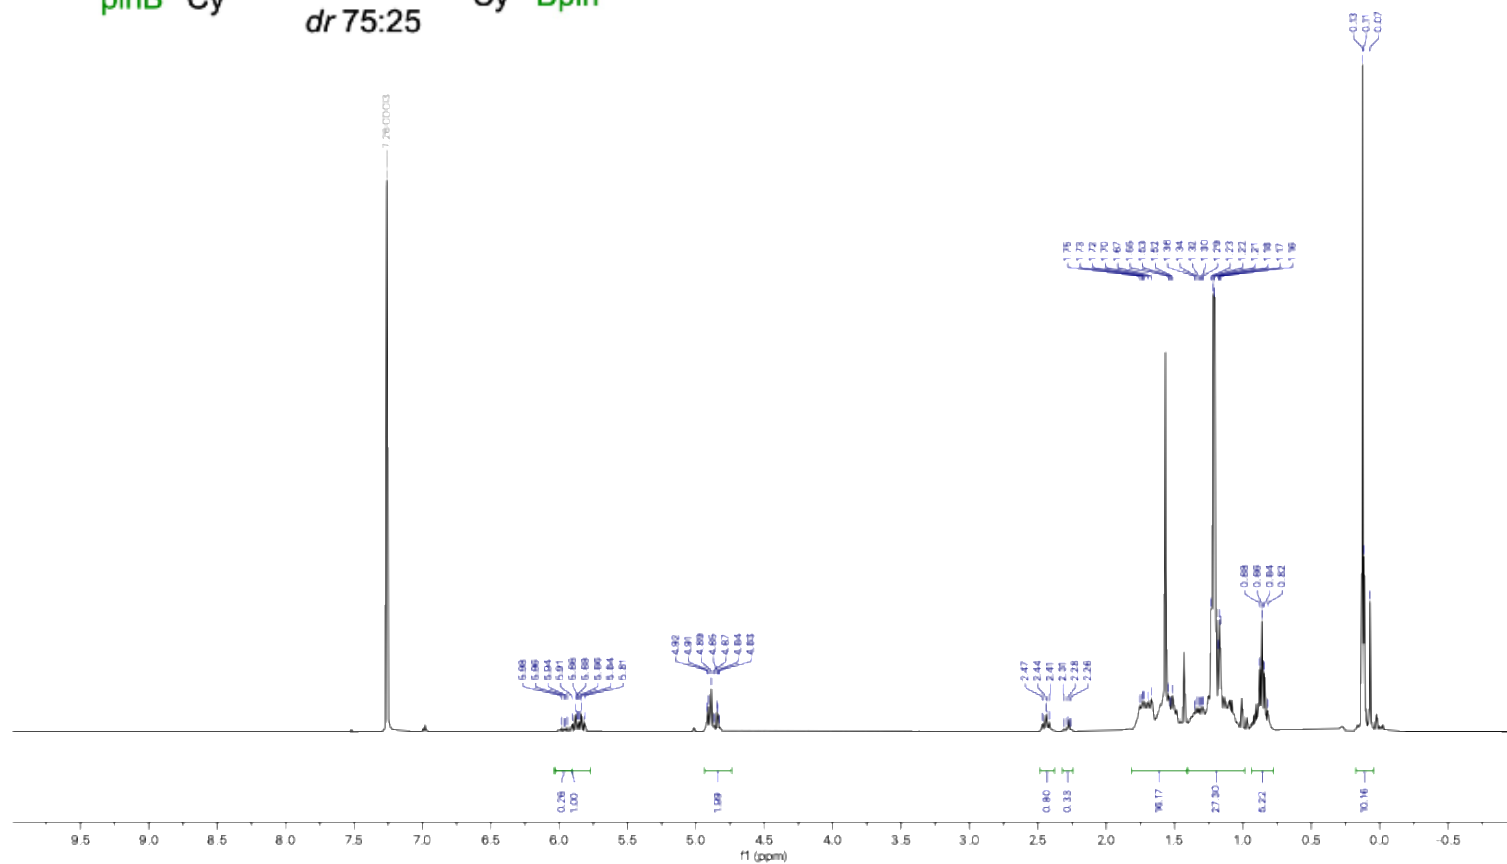

$^1\text{H}$  NMR spectrum (400 MHz,  $\text{CDCl}_3$ )

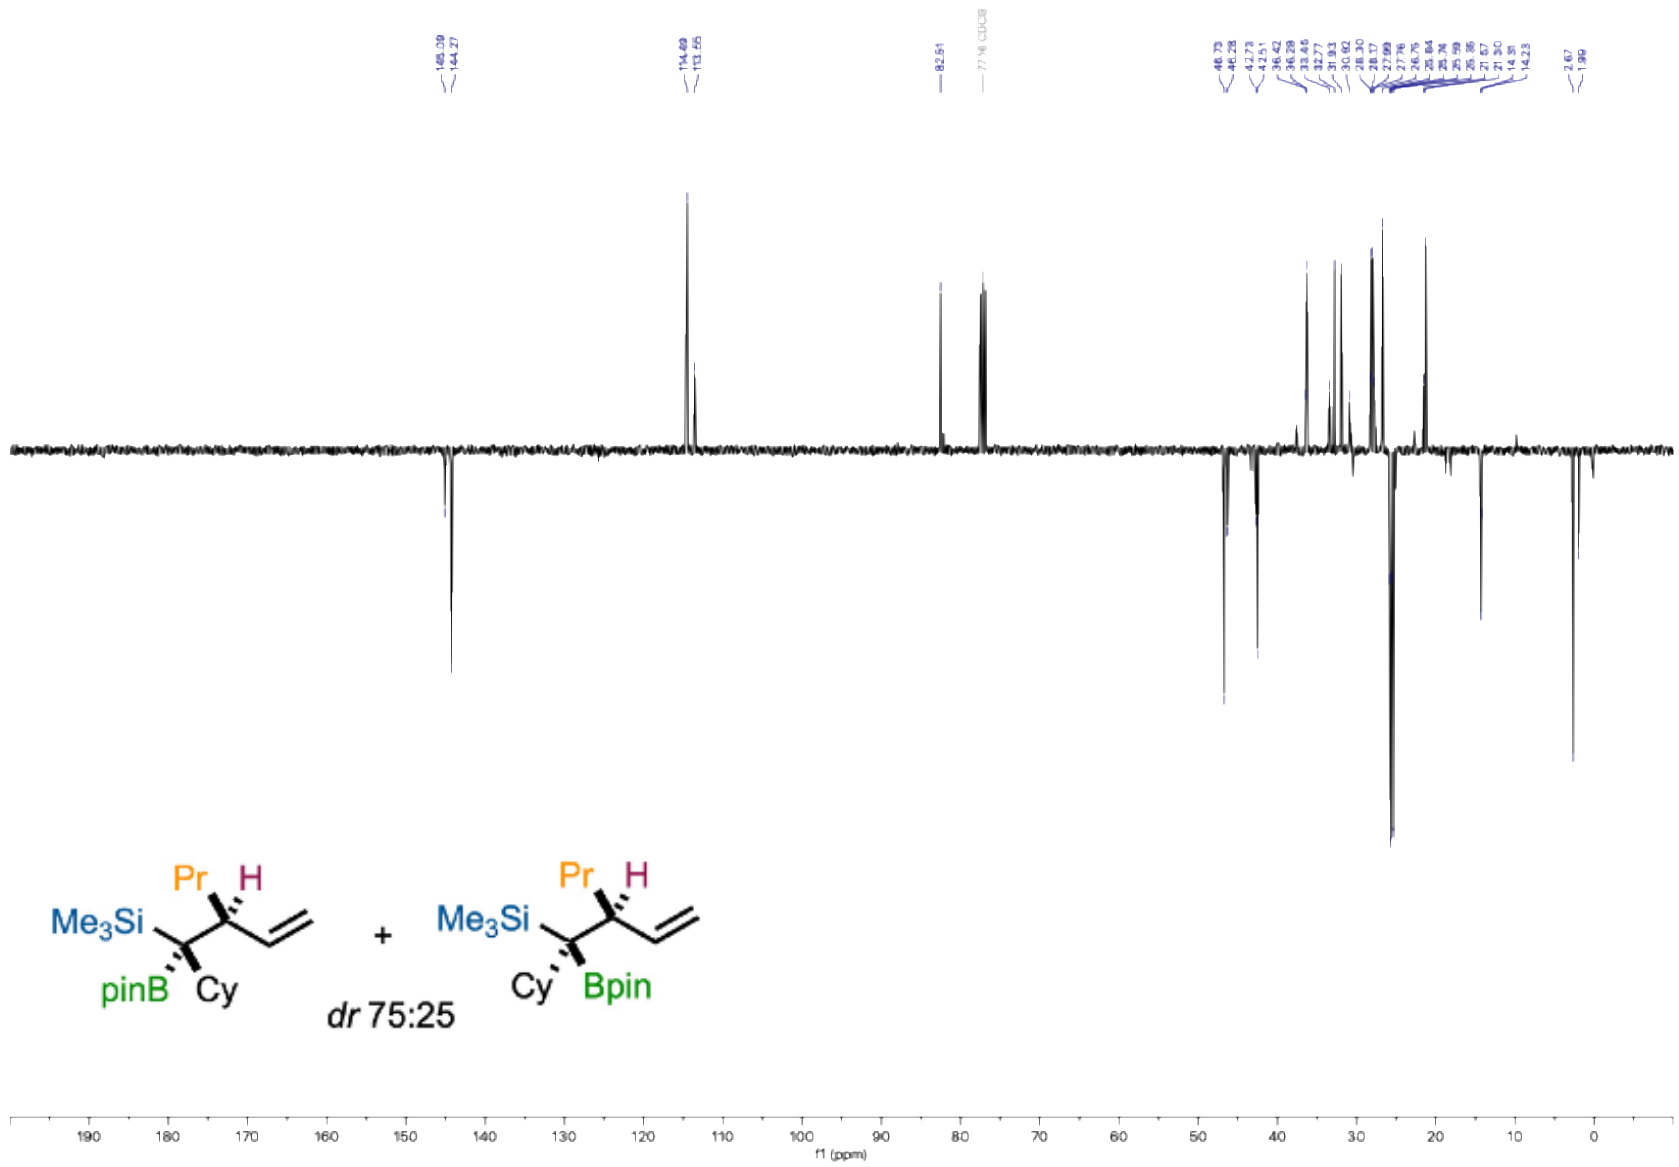

<sup>13</sup>C NMR spectrum (101 MHz, CDCl<sub>3</sub>)

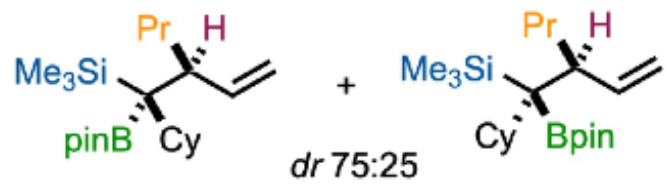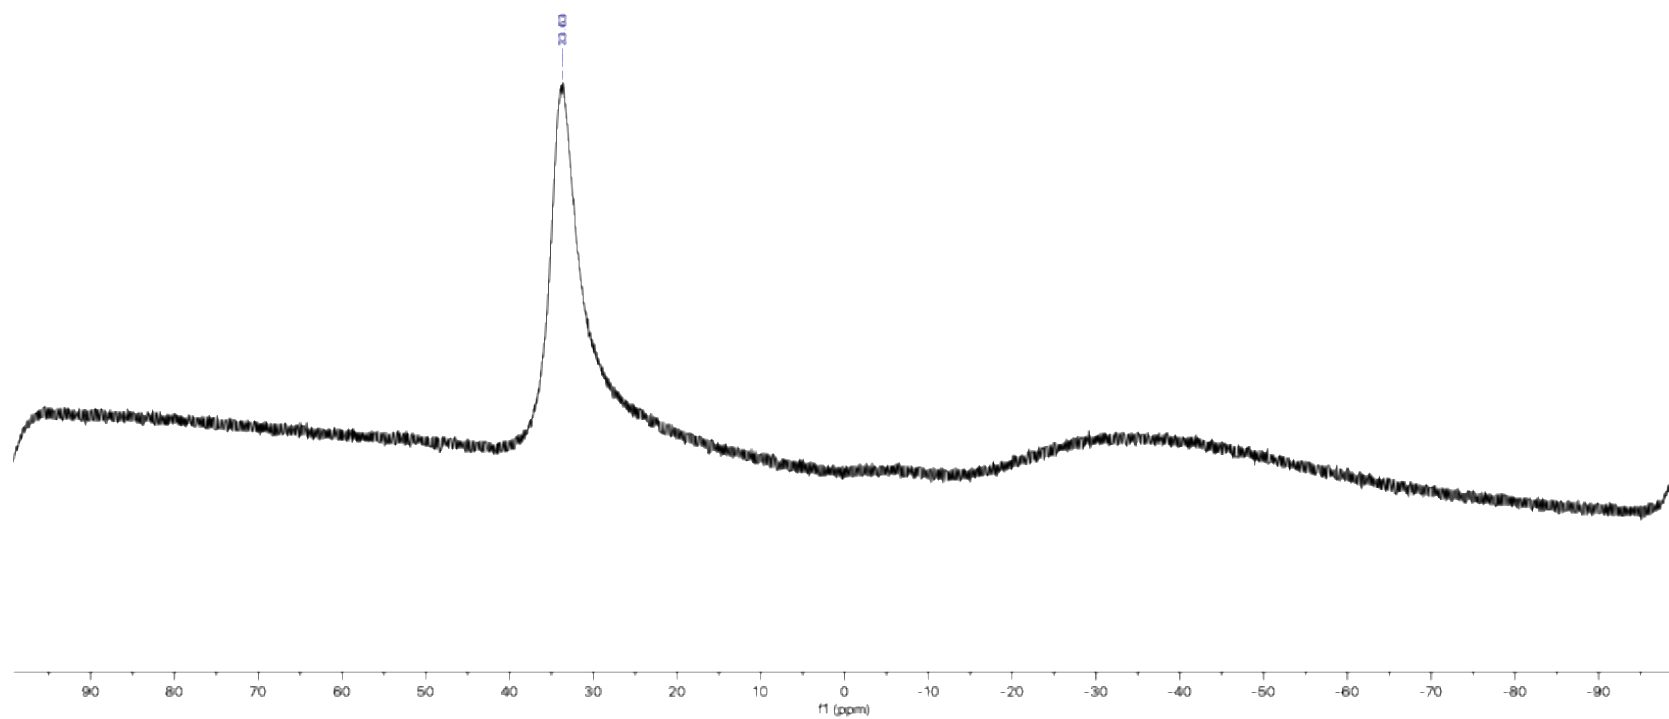

$^{11}\text{B}$  NMR spectrum (128 MHz,  $\text{CDCl}_3$ )

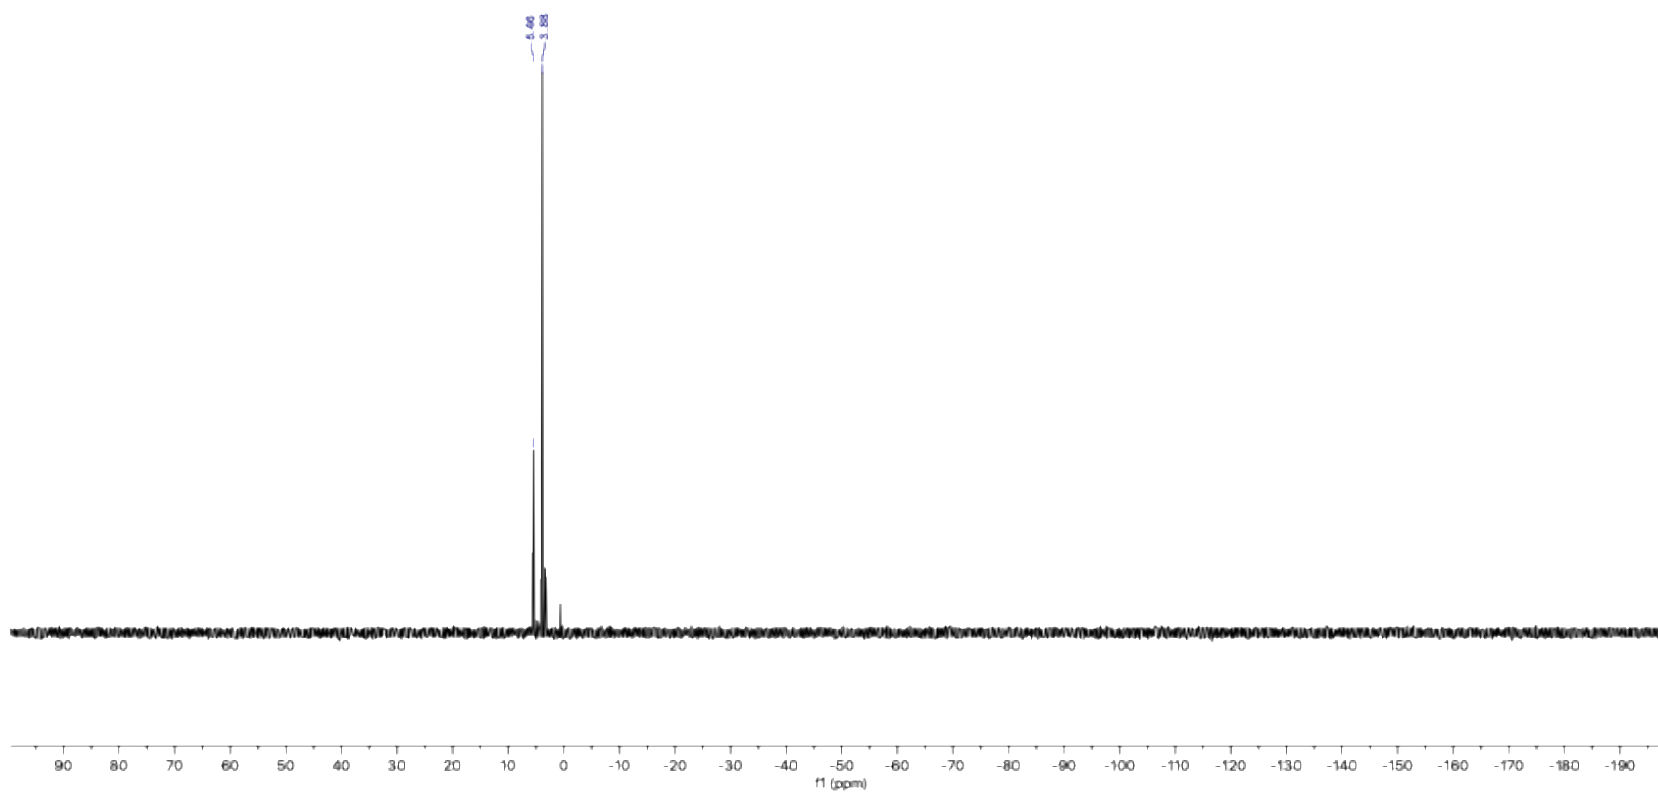

$^{29}\text{Si}$  NMR spectrum (80 MHz,  $\text{CDCl}_3$ )



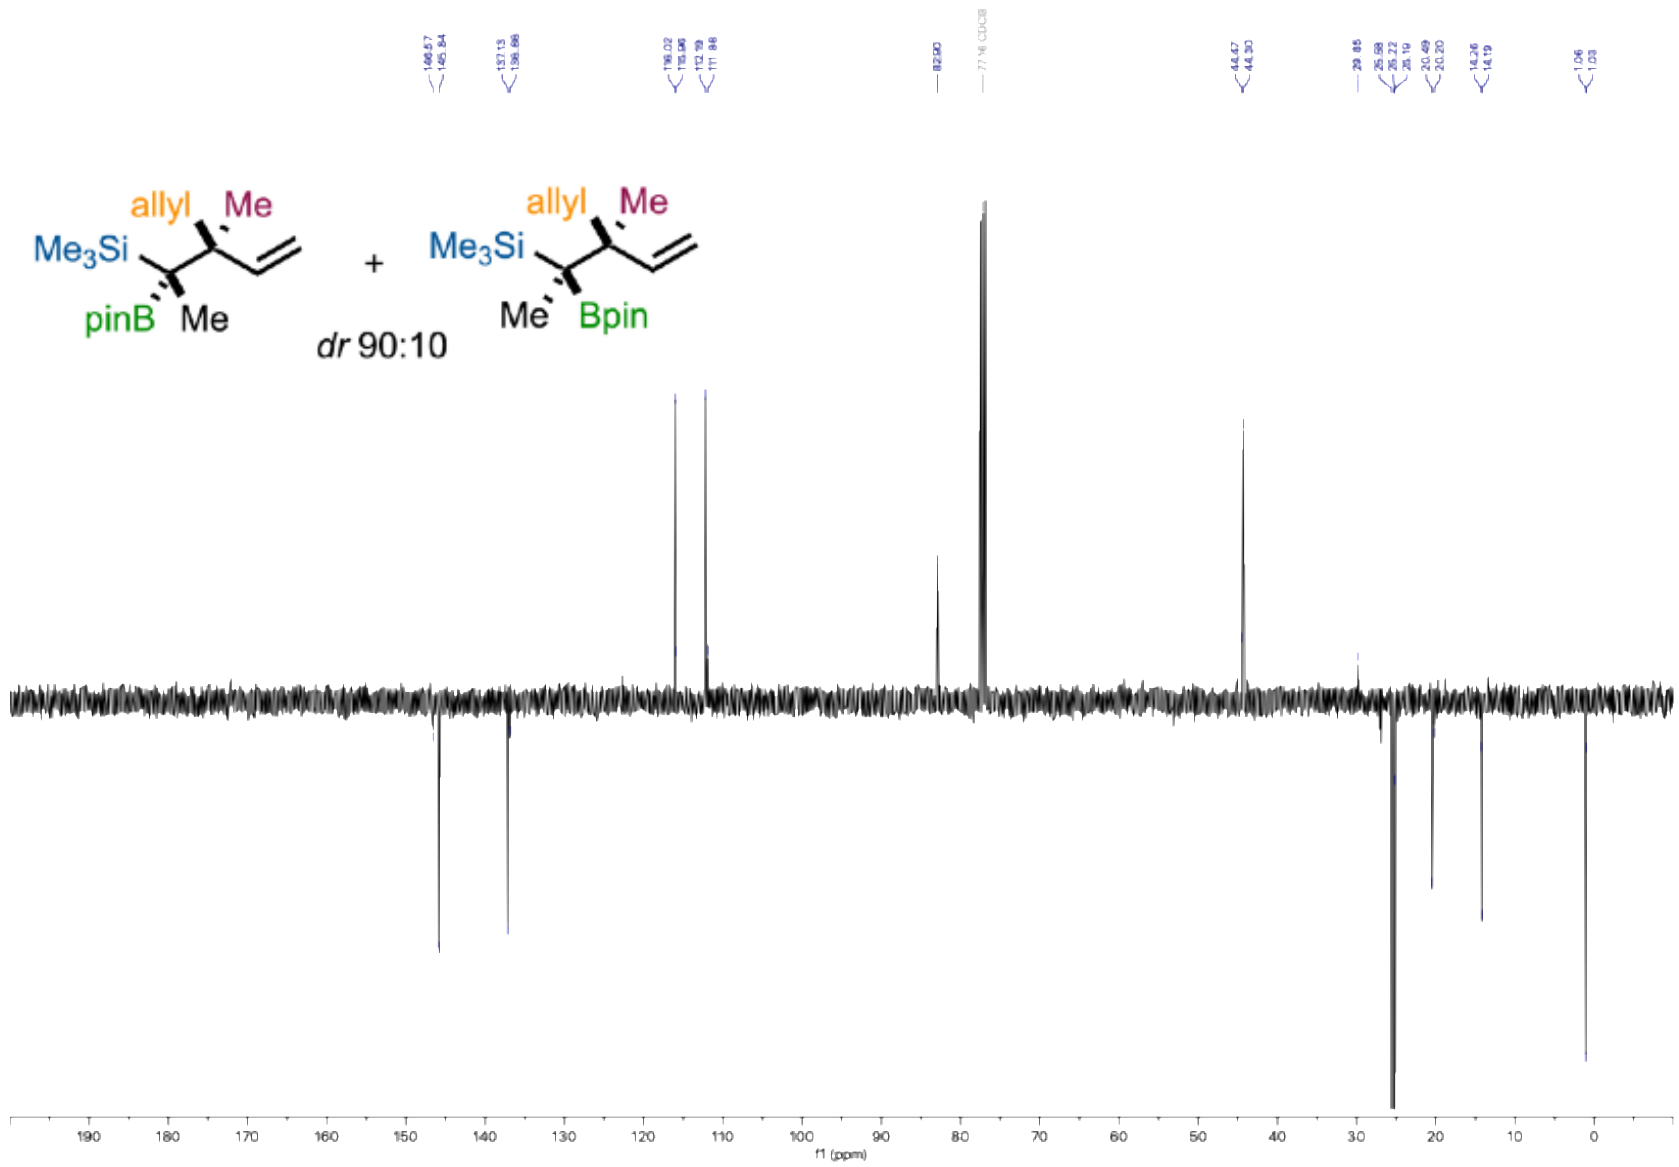

$^{13}\text{C}$  NMR spectrum (101 MHz,  $\text{CDCl}_3$ )

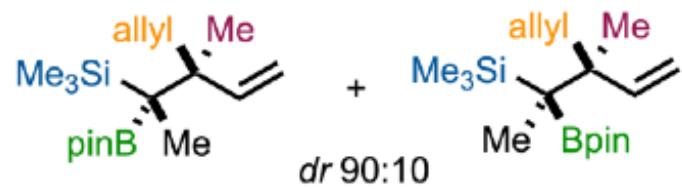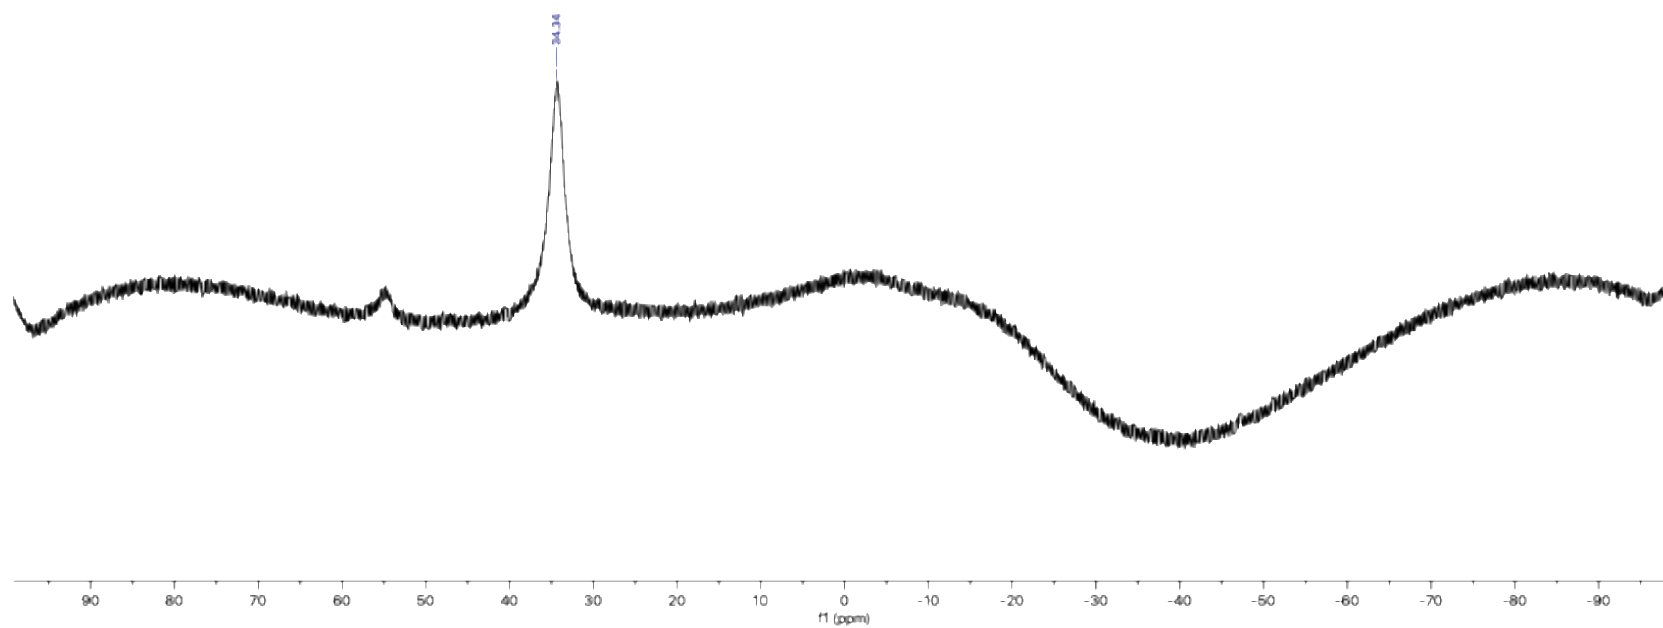

<sup>11</sup>B NMR spectrum (128 MHz, CDCl<sub>3</sub>)

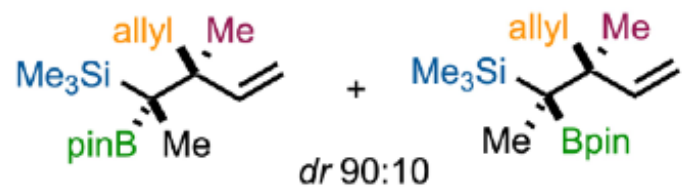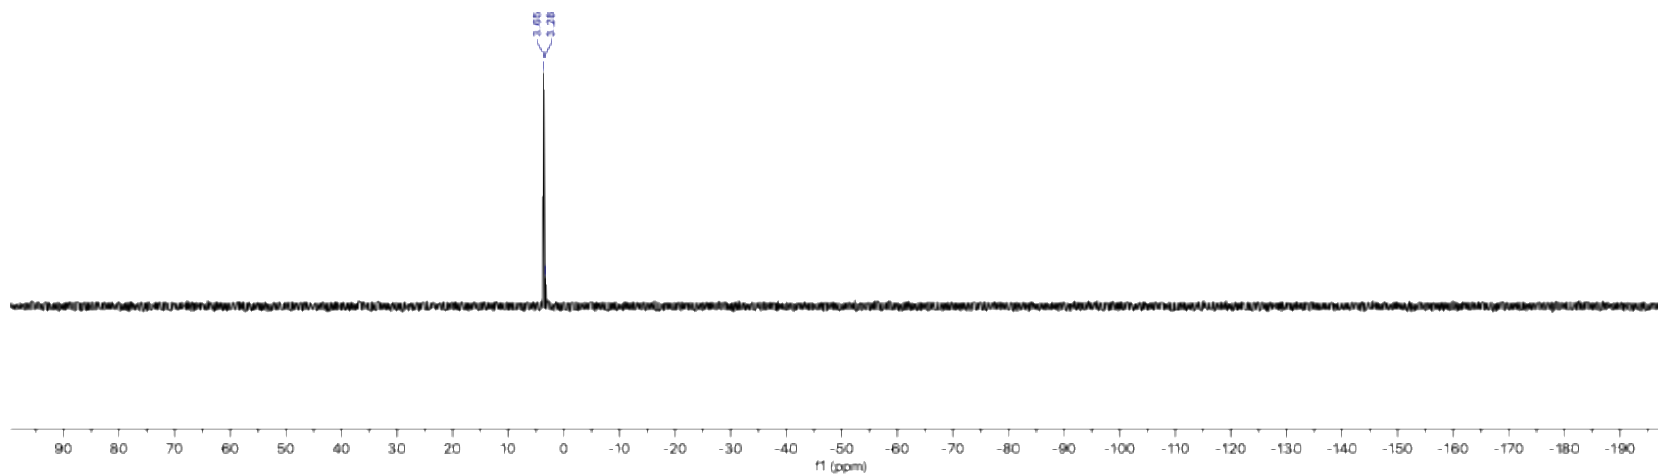

<sup>29</sup>Si NMR spectrum (80 MHz, CDCl<sub>3</sub>)

Tributyl((3*R*\*,4*R*\*)-4-ethyl-3-(4,4,5,5-tetramethyl-1,3,2-dioxaborolan-2-yl)hex-5-en-3-yl)stannane (**6i**)

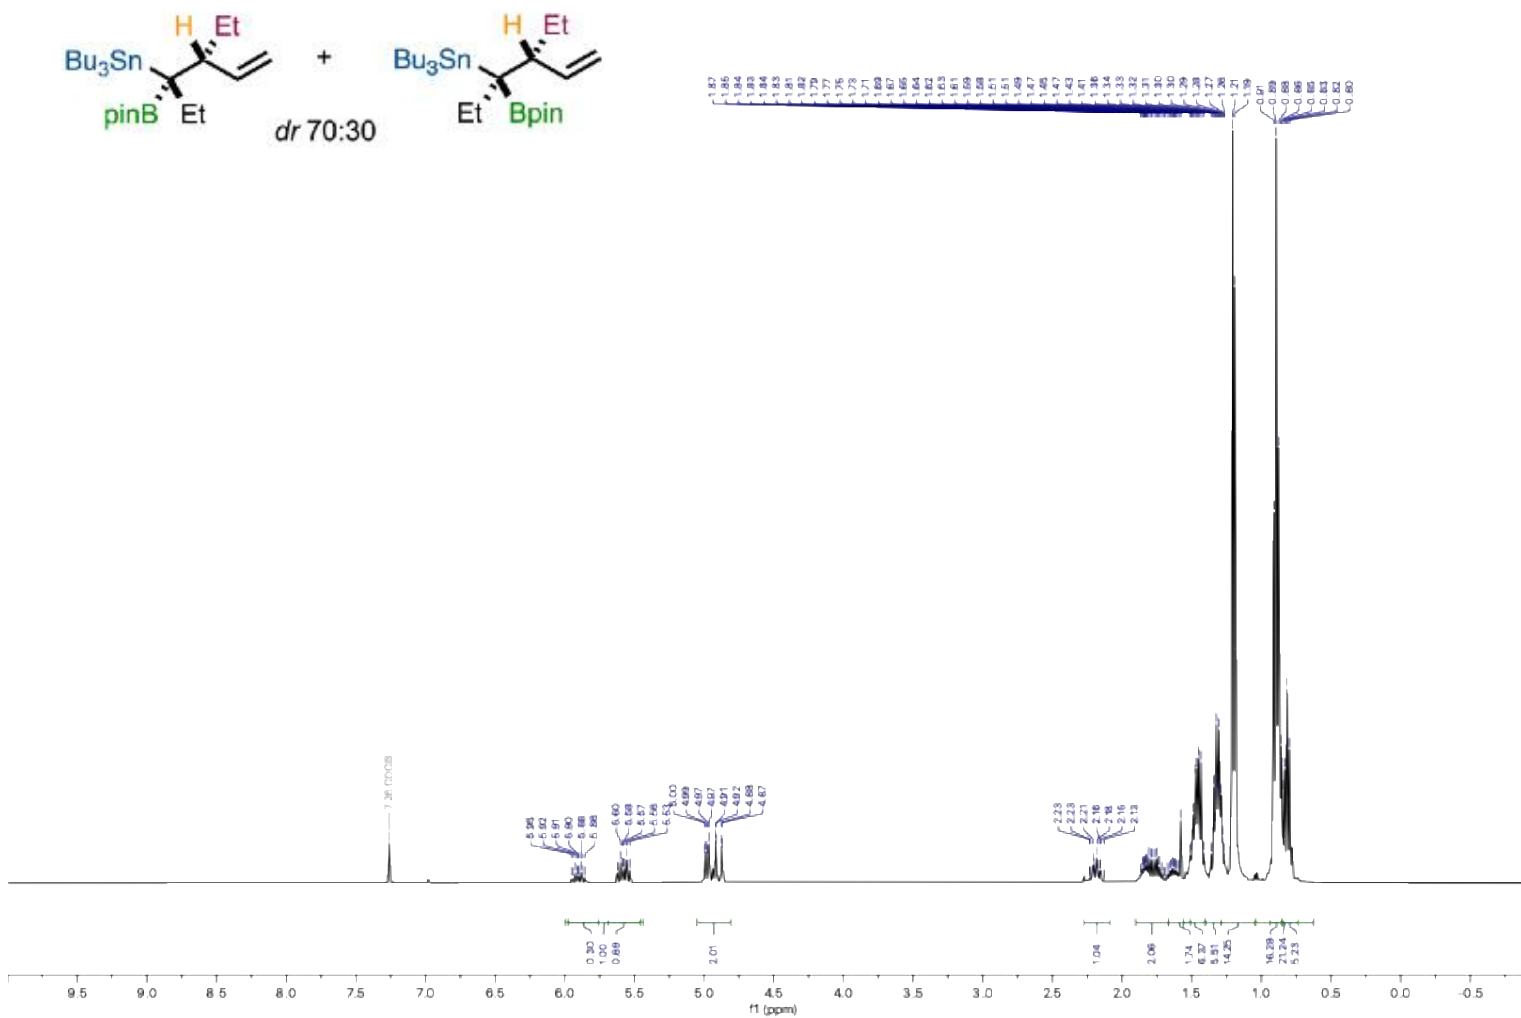

<sup>1</sup>H NMR spectrum (400 MHz, CDCl<sub>3</sub>)

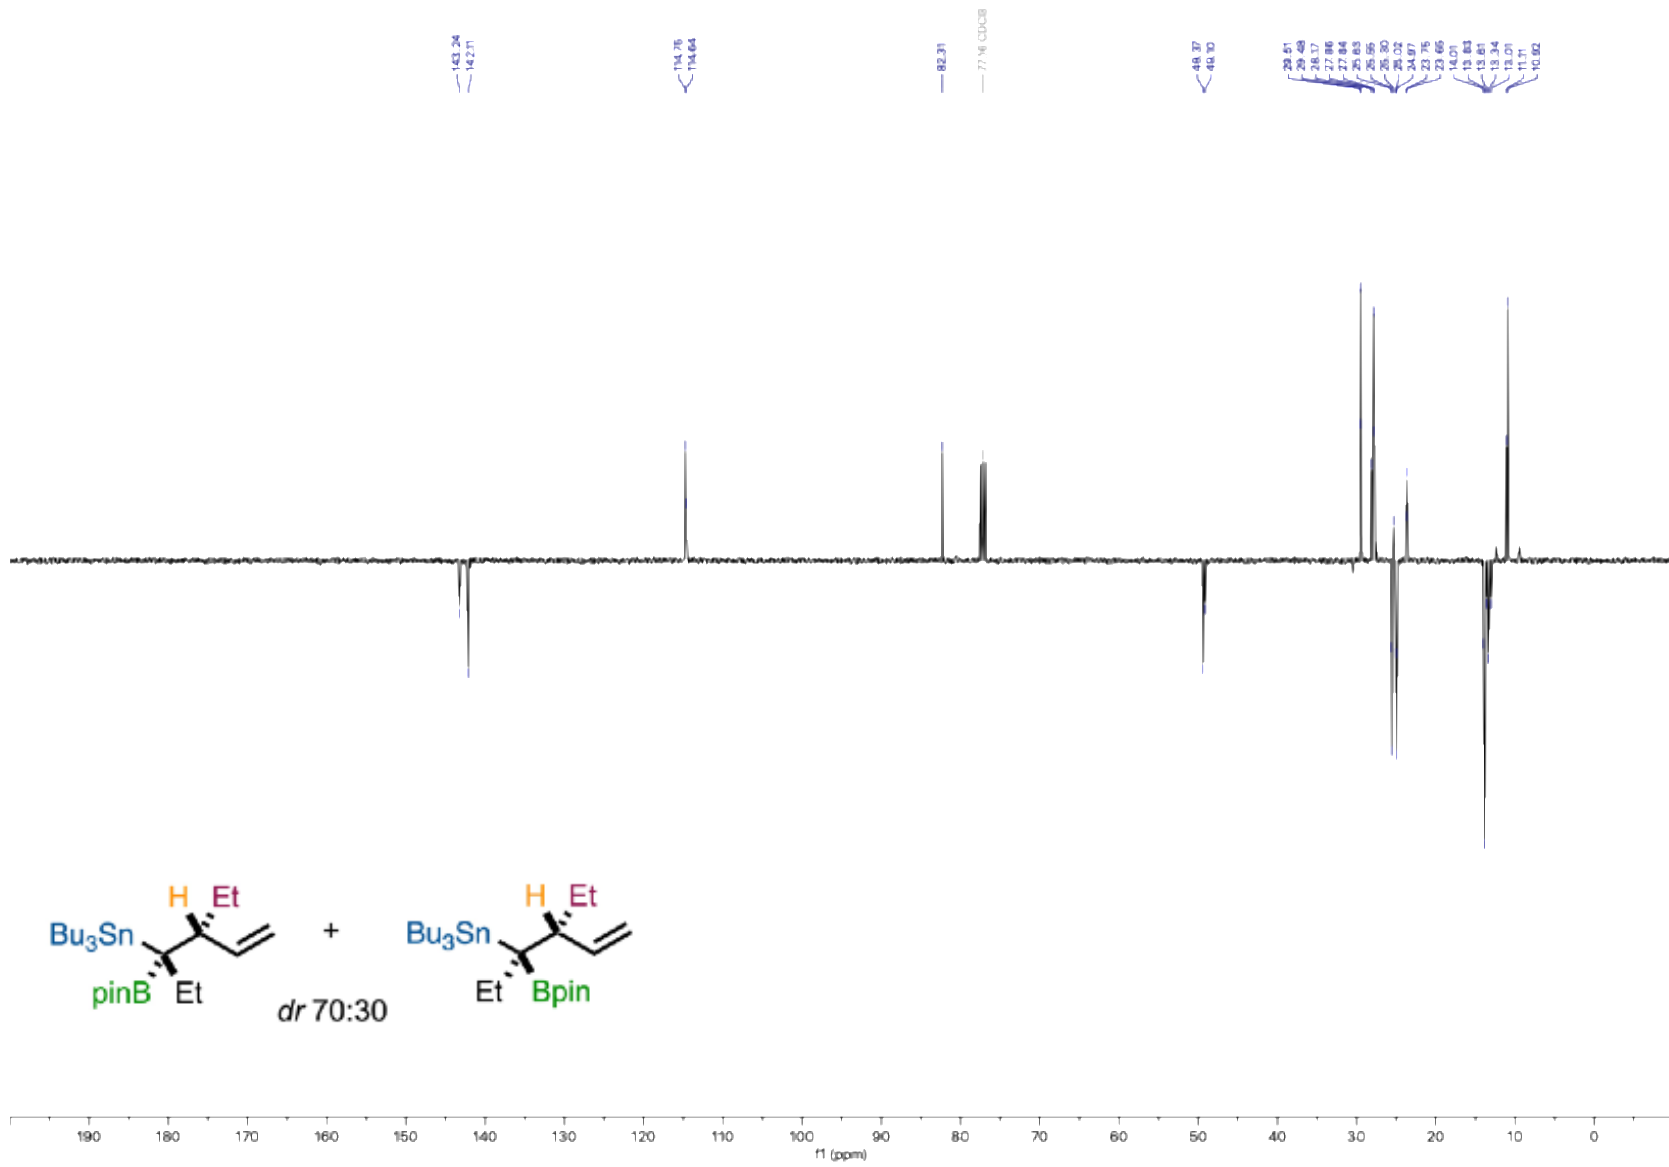

<sup>13</sup>C NMR spectrum (101 MHz, CDCl<sub>3</sub>)

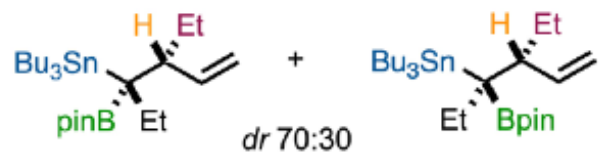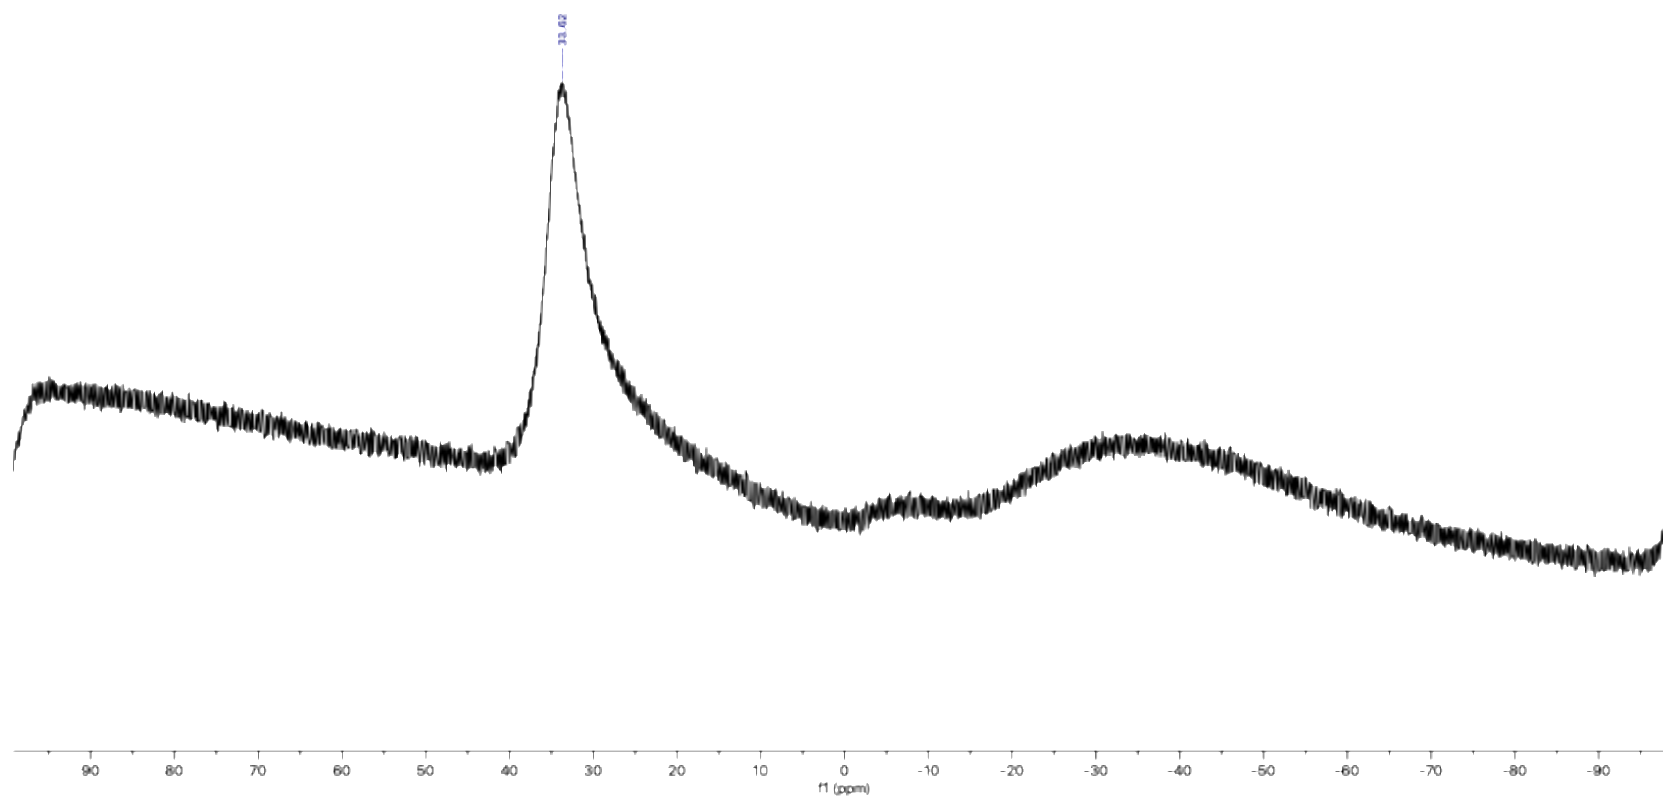

$^{11}\text{B}$  NMR spectrum (128 MHz,  $\text{CDCl}_3$ )

(4-Ethylhex-5-en-3-ylidene)cyclohexane (6j)

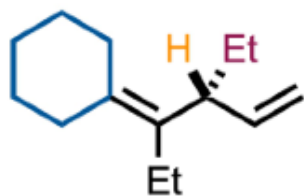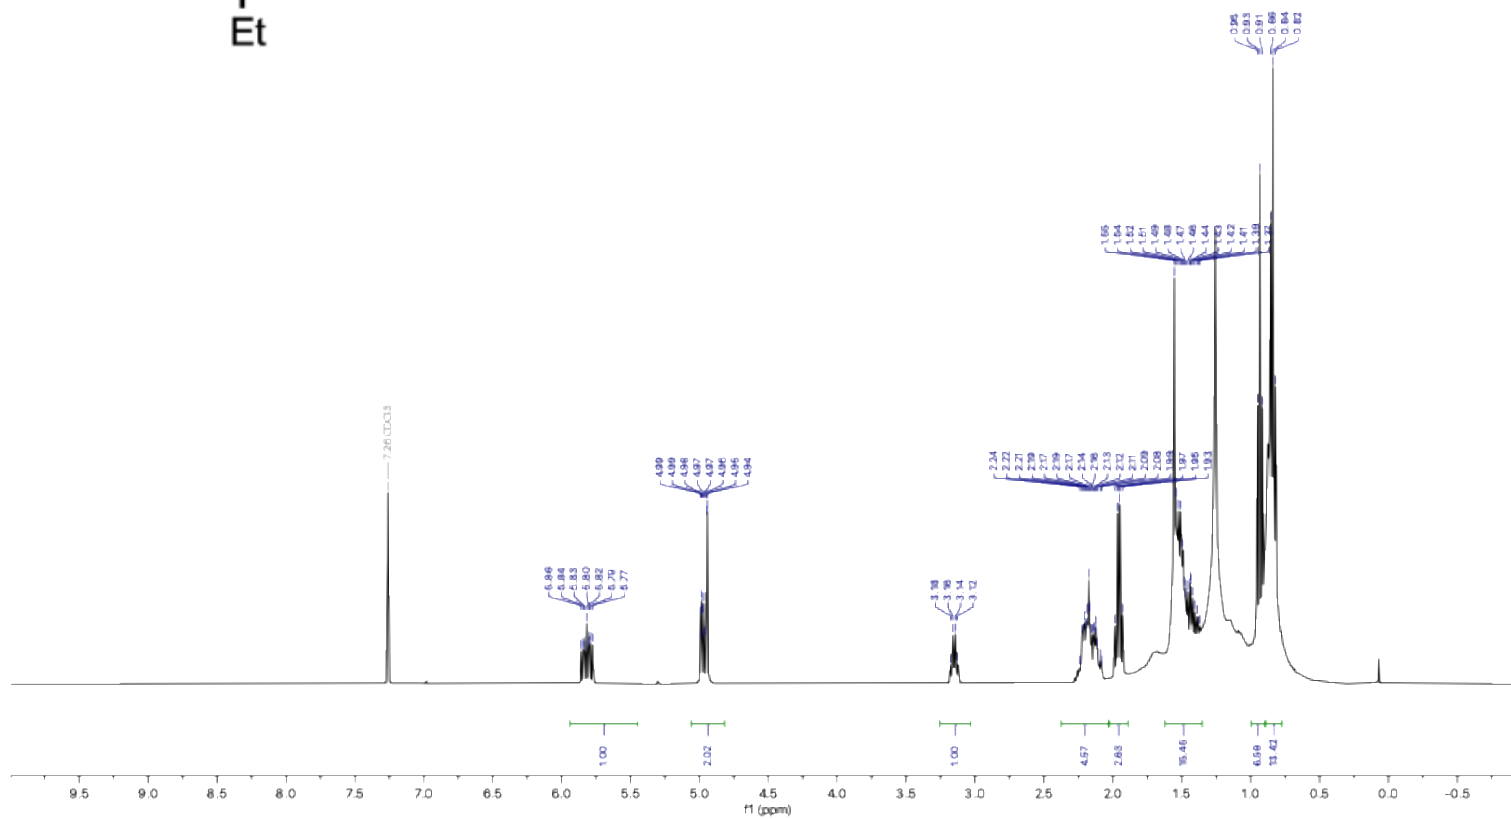

<sup>1</sup>H NMR spectrum (400 MHz, CDCl<sub>3</sub>)

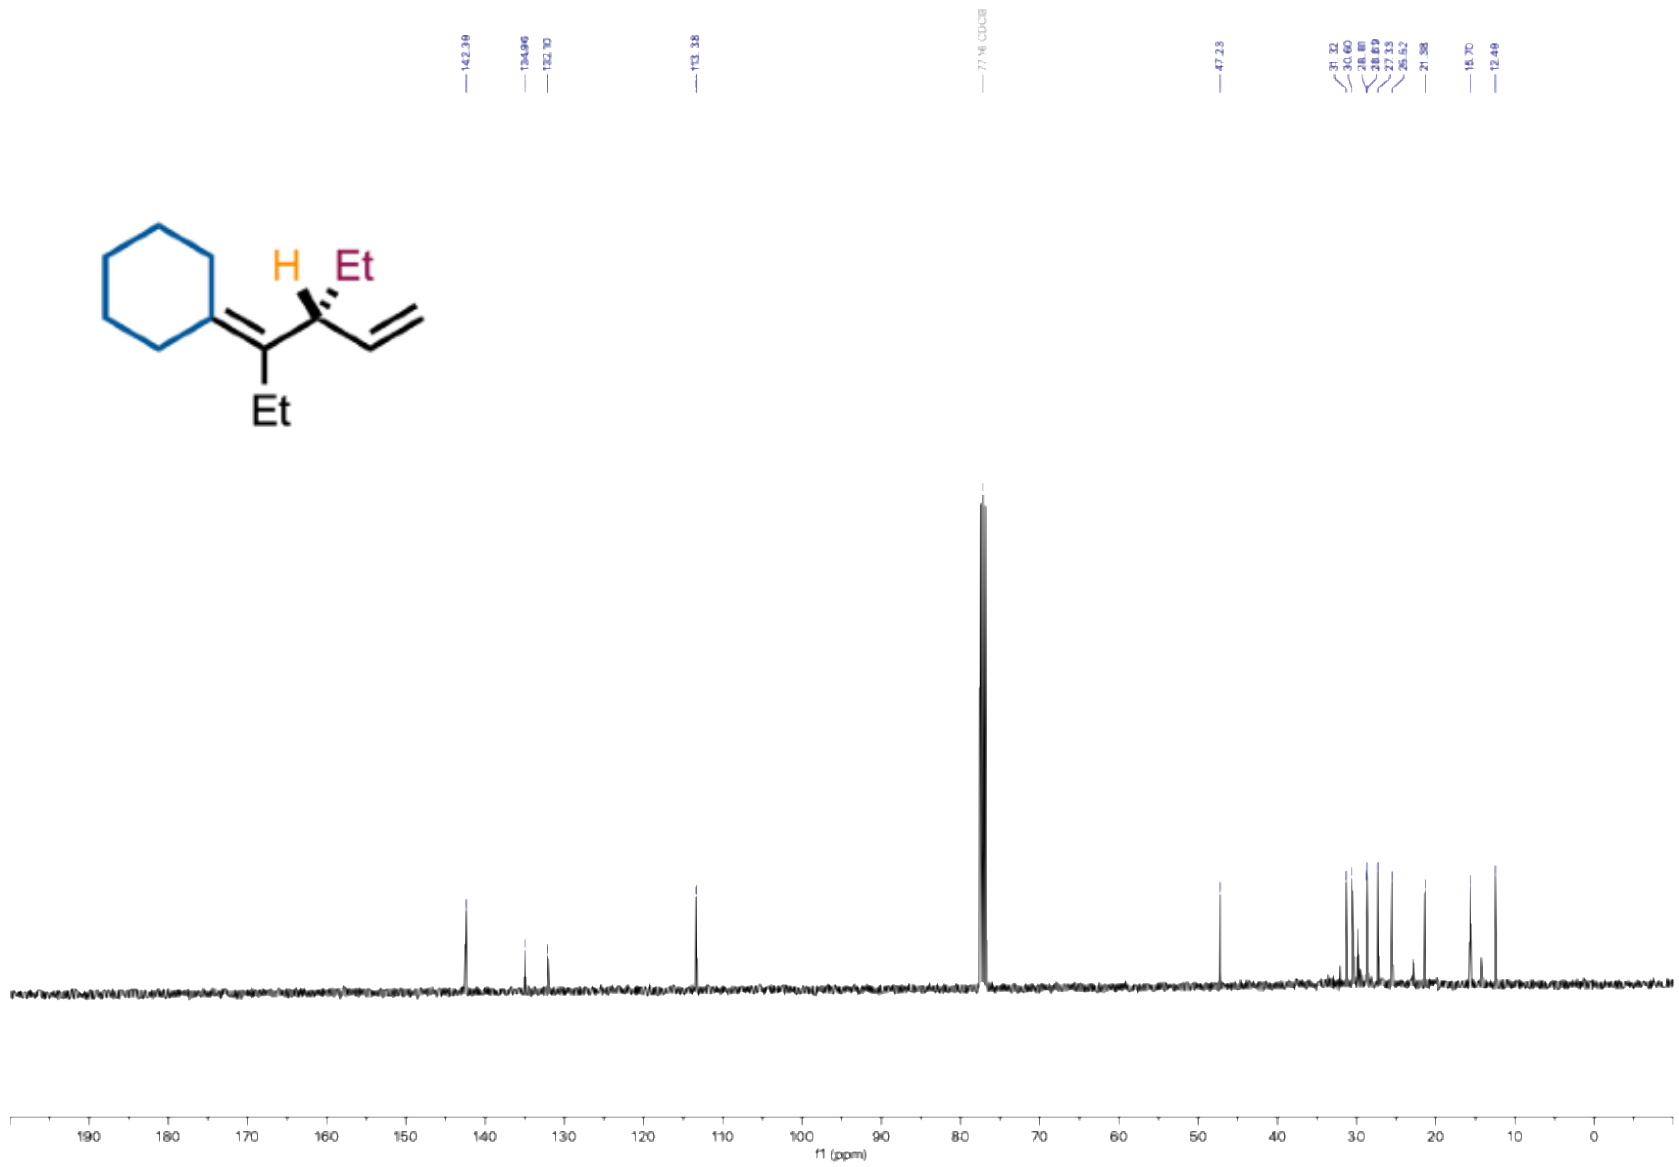

<sup>13</sup>C NMR spectrum (101 MHz, CDCl<sub>3</sub>)

2-((1*R*\*,2*S*\*)-1-Butyl-2-vinylcyclopentyl)-4,4,5,5-tetramethyl-1,3,2-dioxaborolane (**6k**)

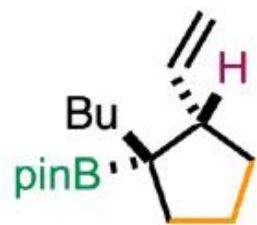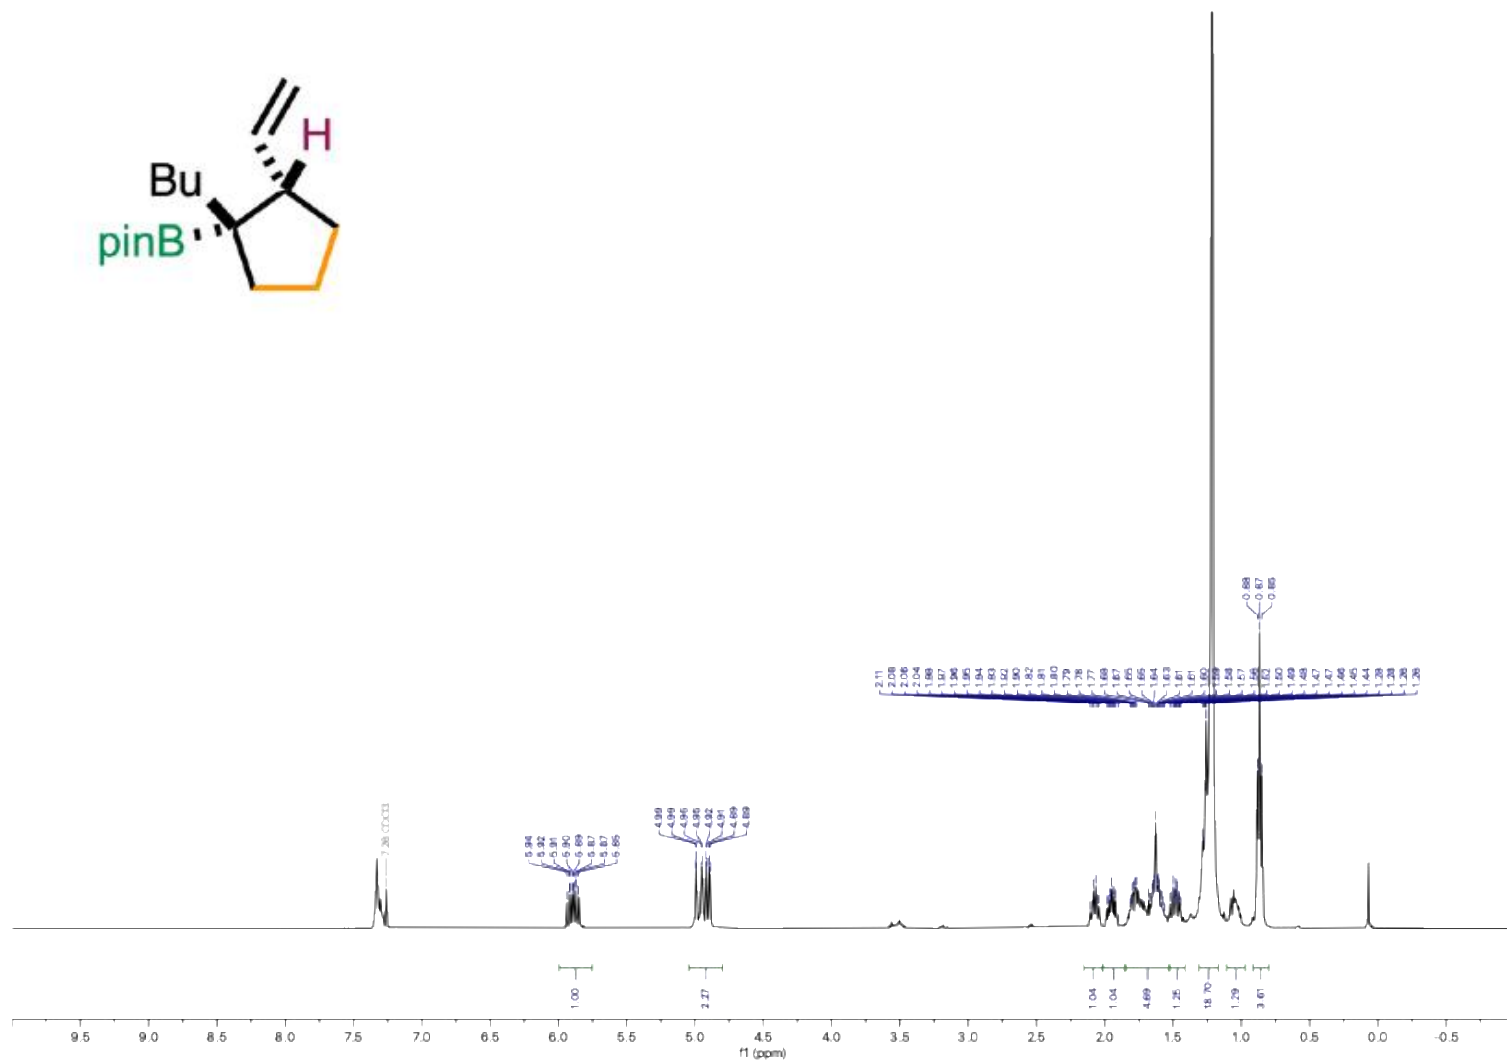

<sup>1</sup>H NMR spectrum (400 MHz, CDCl<sub>3</sub>)

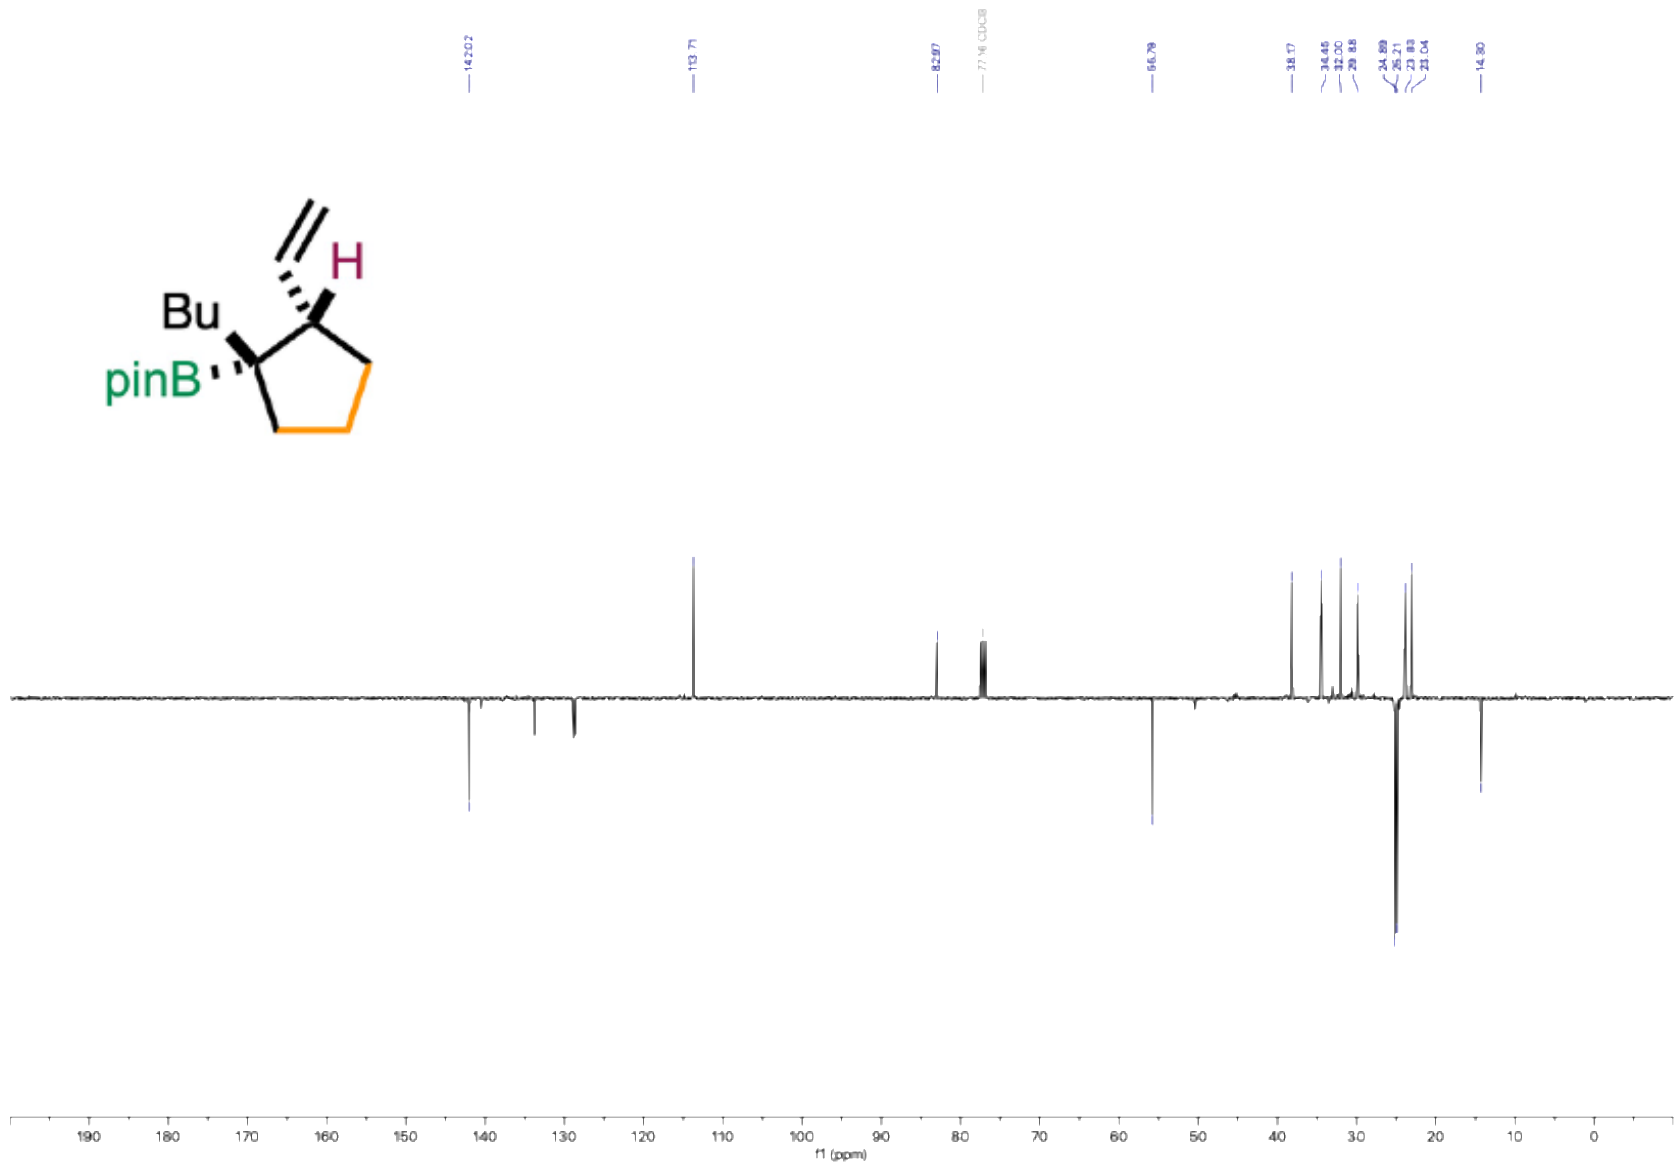

<sup>13</sup>C NMR spectrum (101 MHz, CDCl<sub>3</sub>)

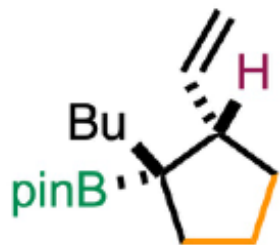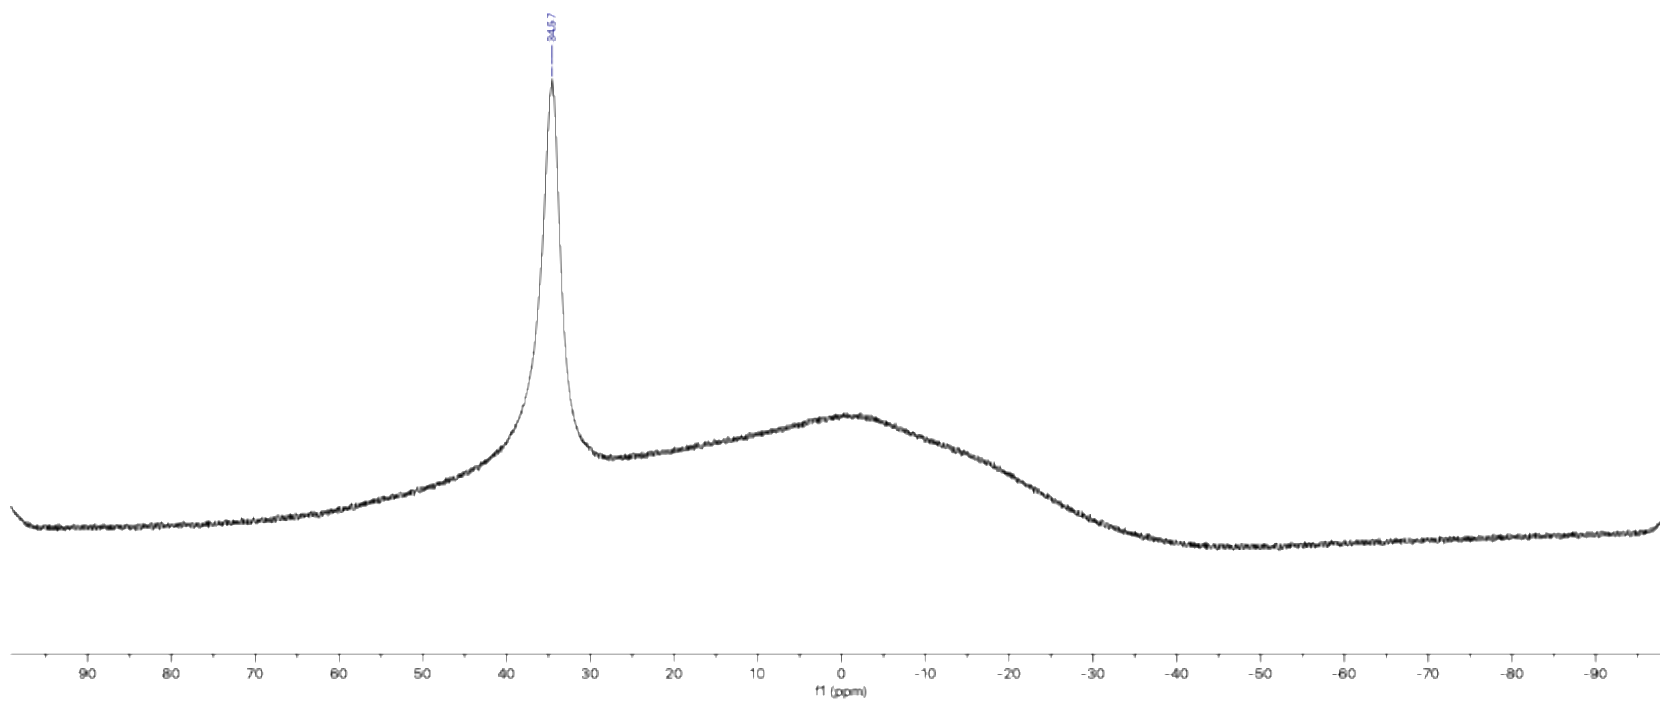

$^{11}\text{B}$  NMR spectrum (128 MHz,  $\text{CDCl}_3$ )

Dioxo[*N,N,N,N*-tetramethylethane-1,2-diaminetetramethylehylendiamine][*(2R\*,3R\*,4R\*)*-4-(dimethyl(phenyl)silyl)-3-methyl-4-(4,4,5,5-tetramethyl-1,3,2-dioxaborolan-2-yl)pentane-1,2-diol]osmium complex **7b**

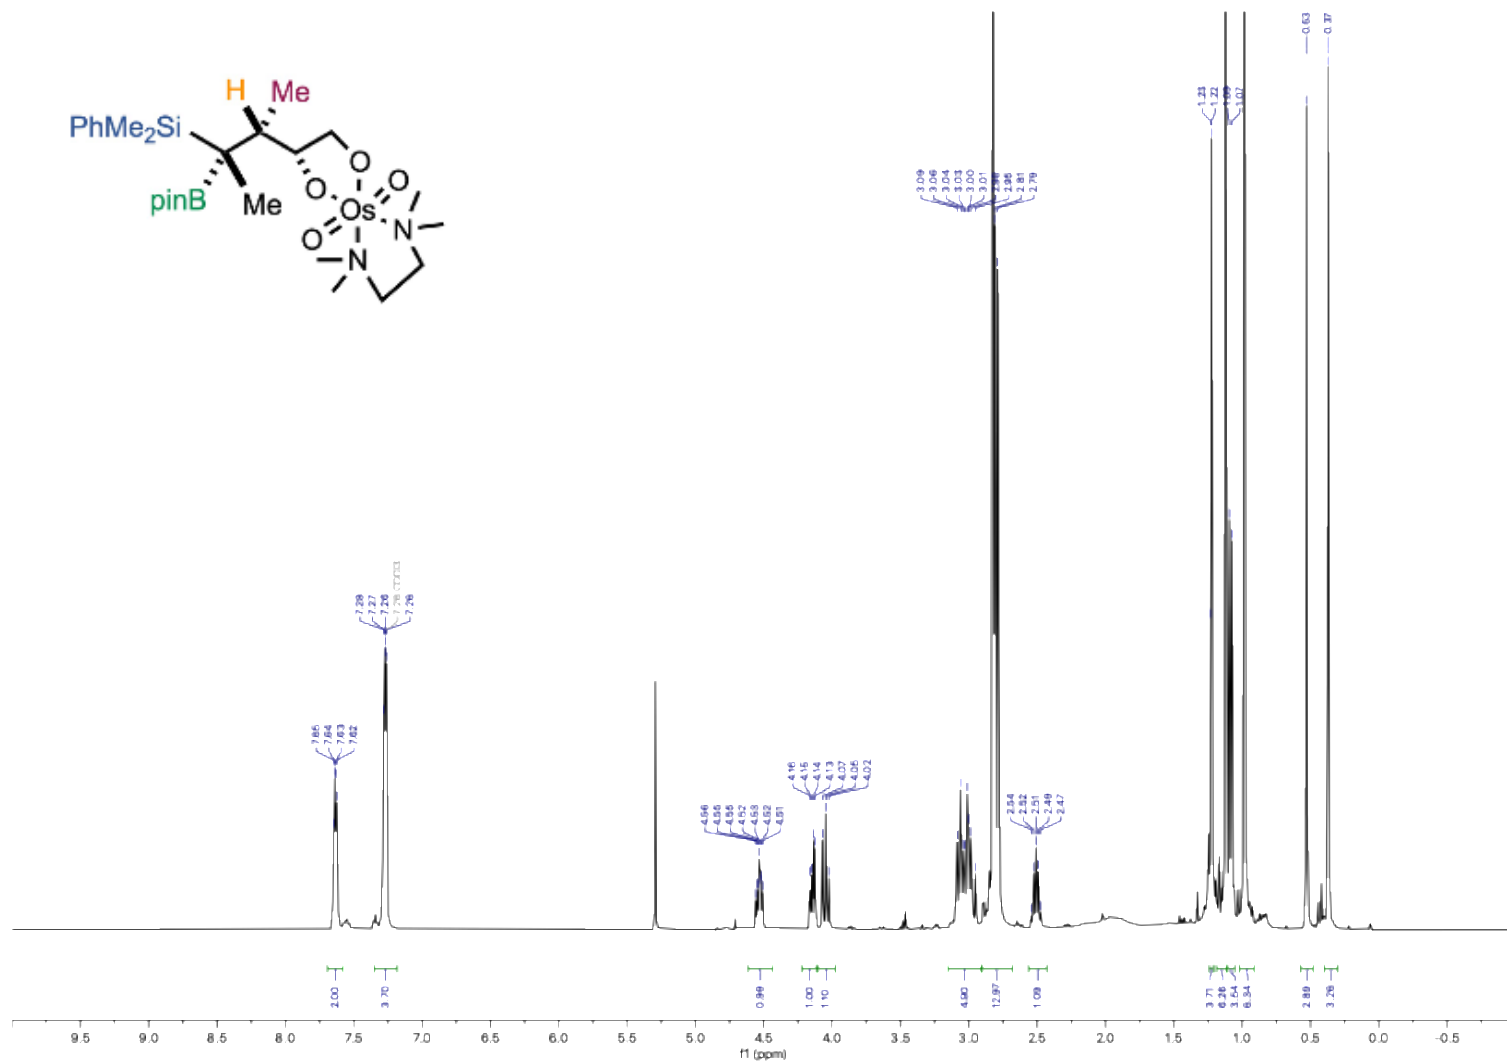

<sup>1</sup>H NMR spectrum (400 MHz, CDCl<sub>3</sub>)

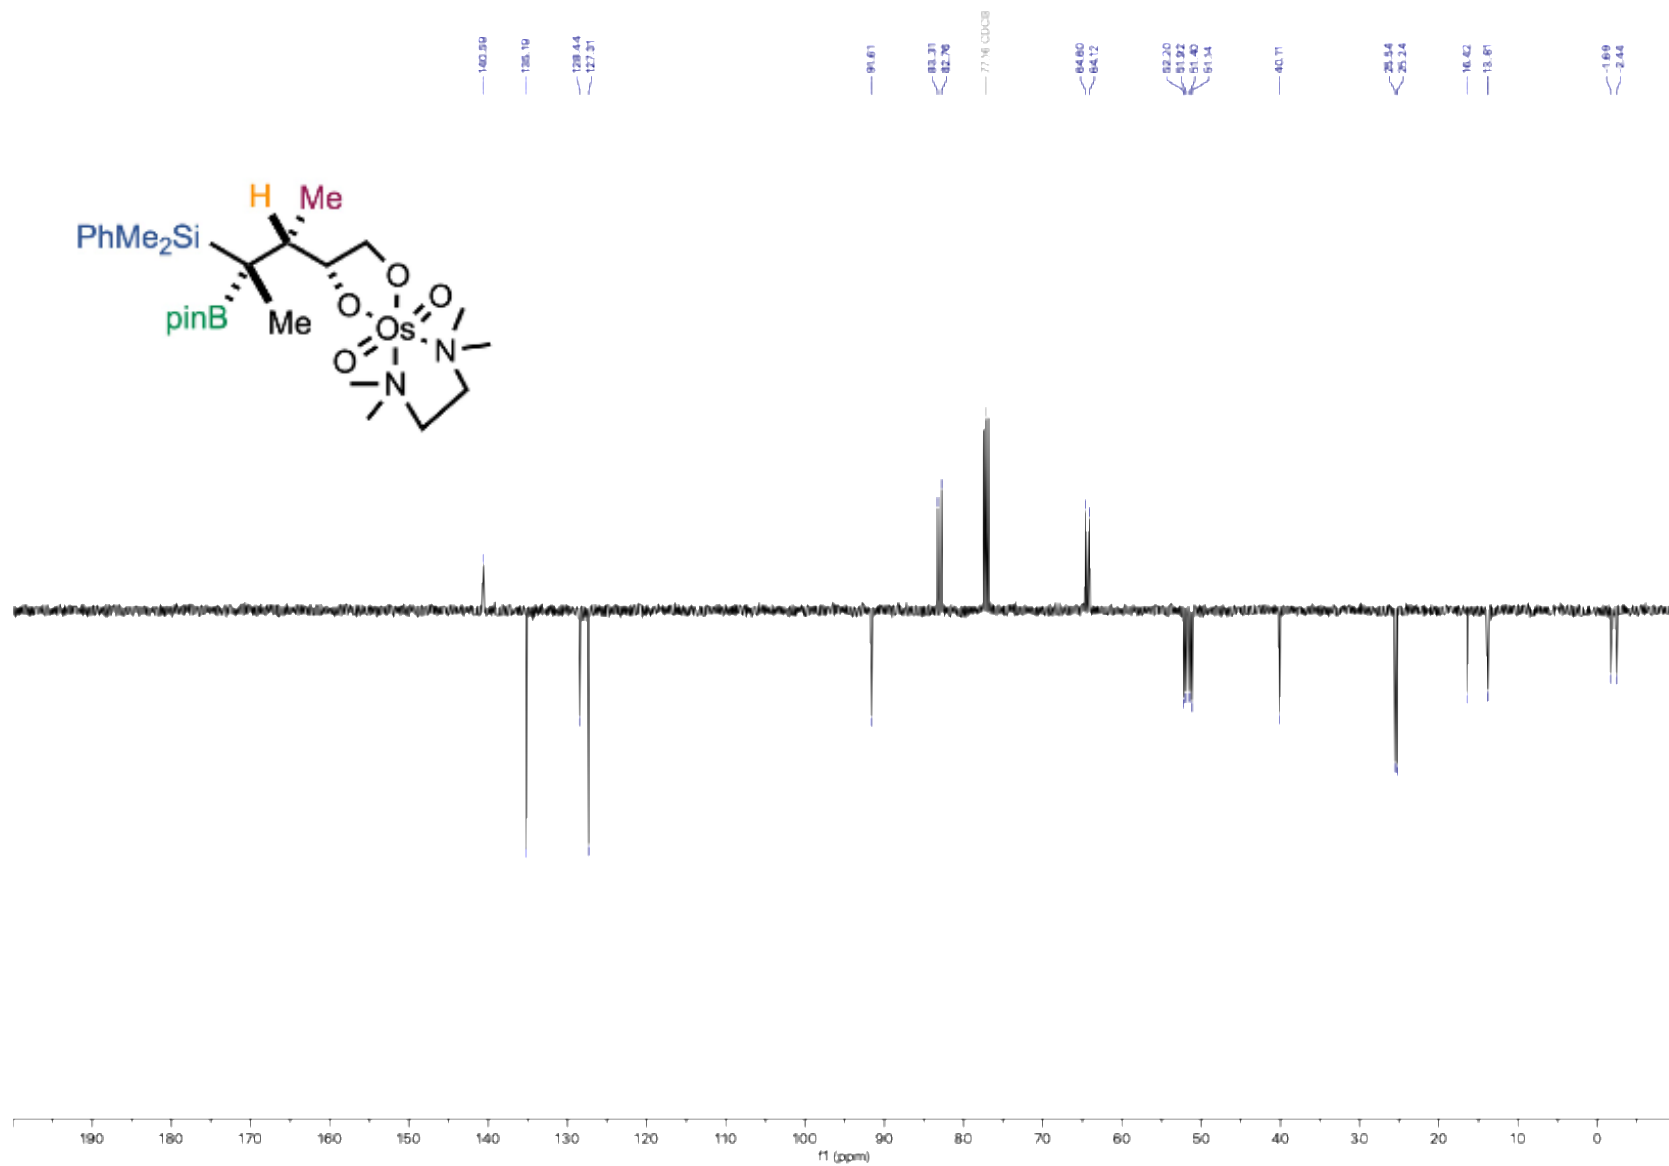

<sup>13</sup>C NMR spectrum (101 MHz, CDCl<sub>3</sub>)

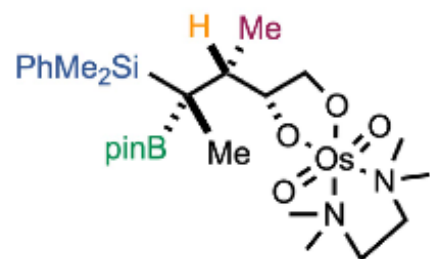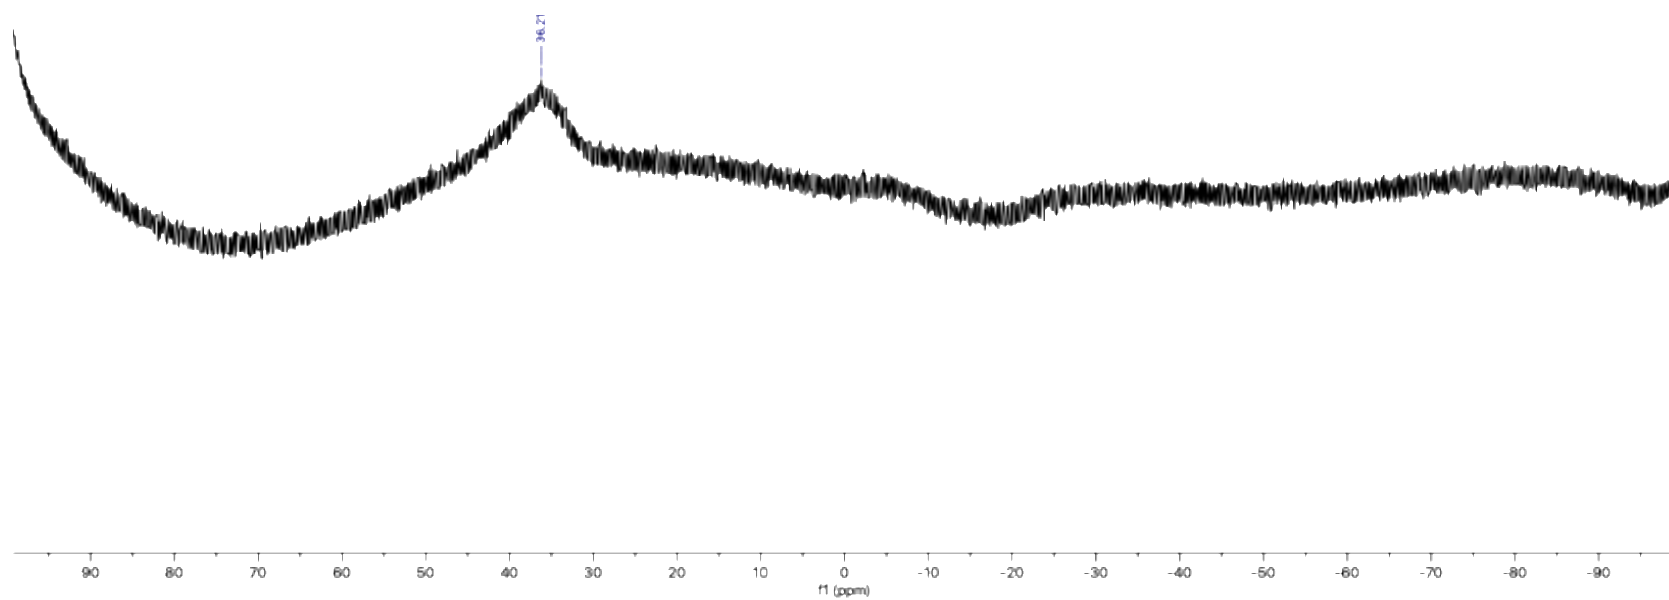

<sup>11</sup>B NMR spectrum (128 MHz, CDCl<sub>3</sub>)

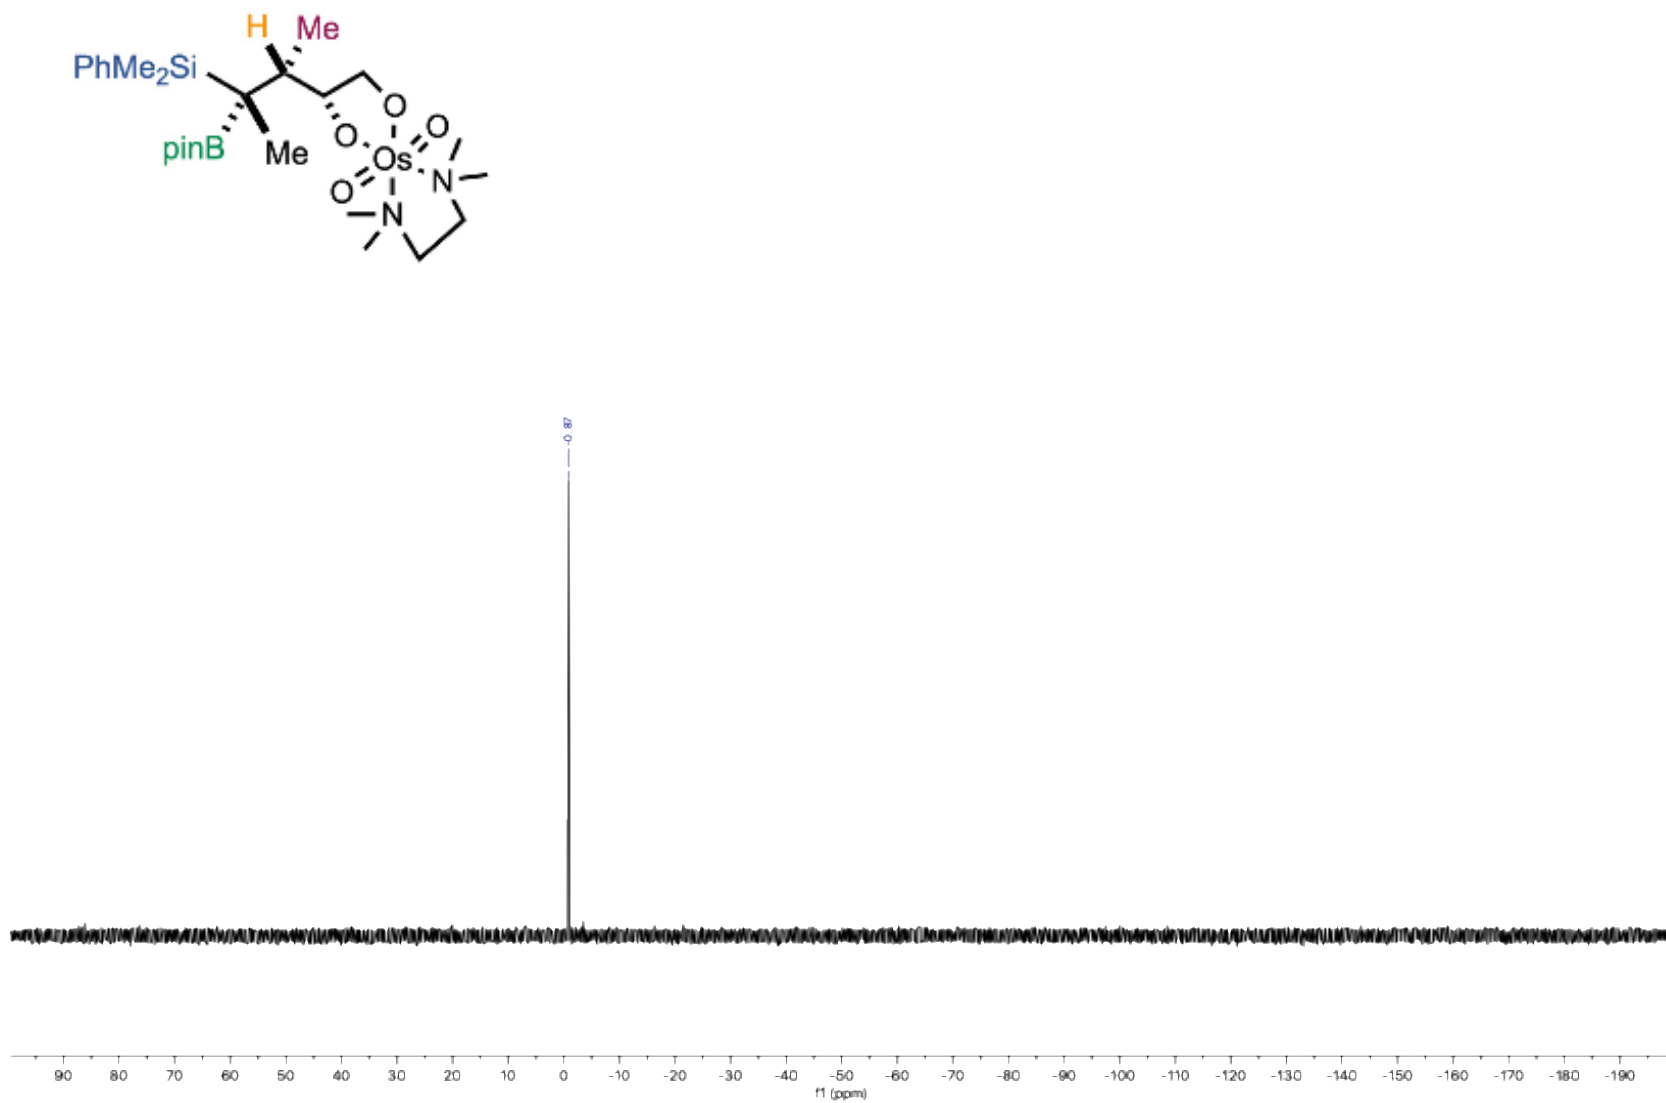

$^{29}\text{Si}$  NMR spectrum (80 MHz,  $\text{CDCl}_3$ )

Dioxo[*N,N,N,N*-tetramethylethane-1,2-diaminetetramethylethylendiamine][1-((1*R*\*,2*R*\*)-2-butyl-2-(4,4,5,5-tetramethyl-1,3,2-dioxaborolan-2-yl)cyclopentyl)ethane-1,2-diol]osmium complex **7k**

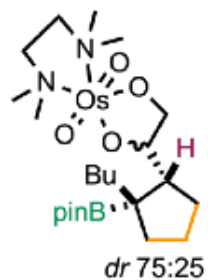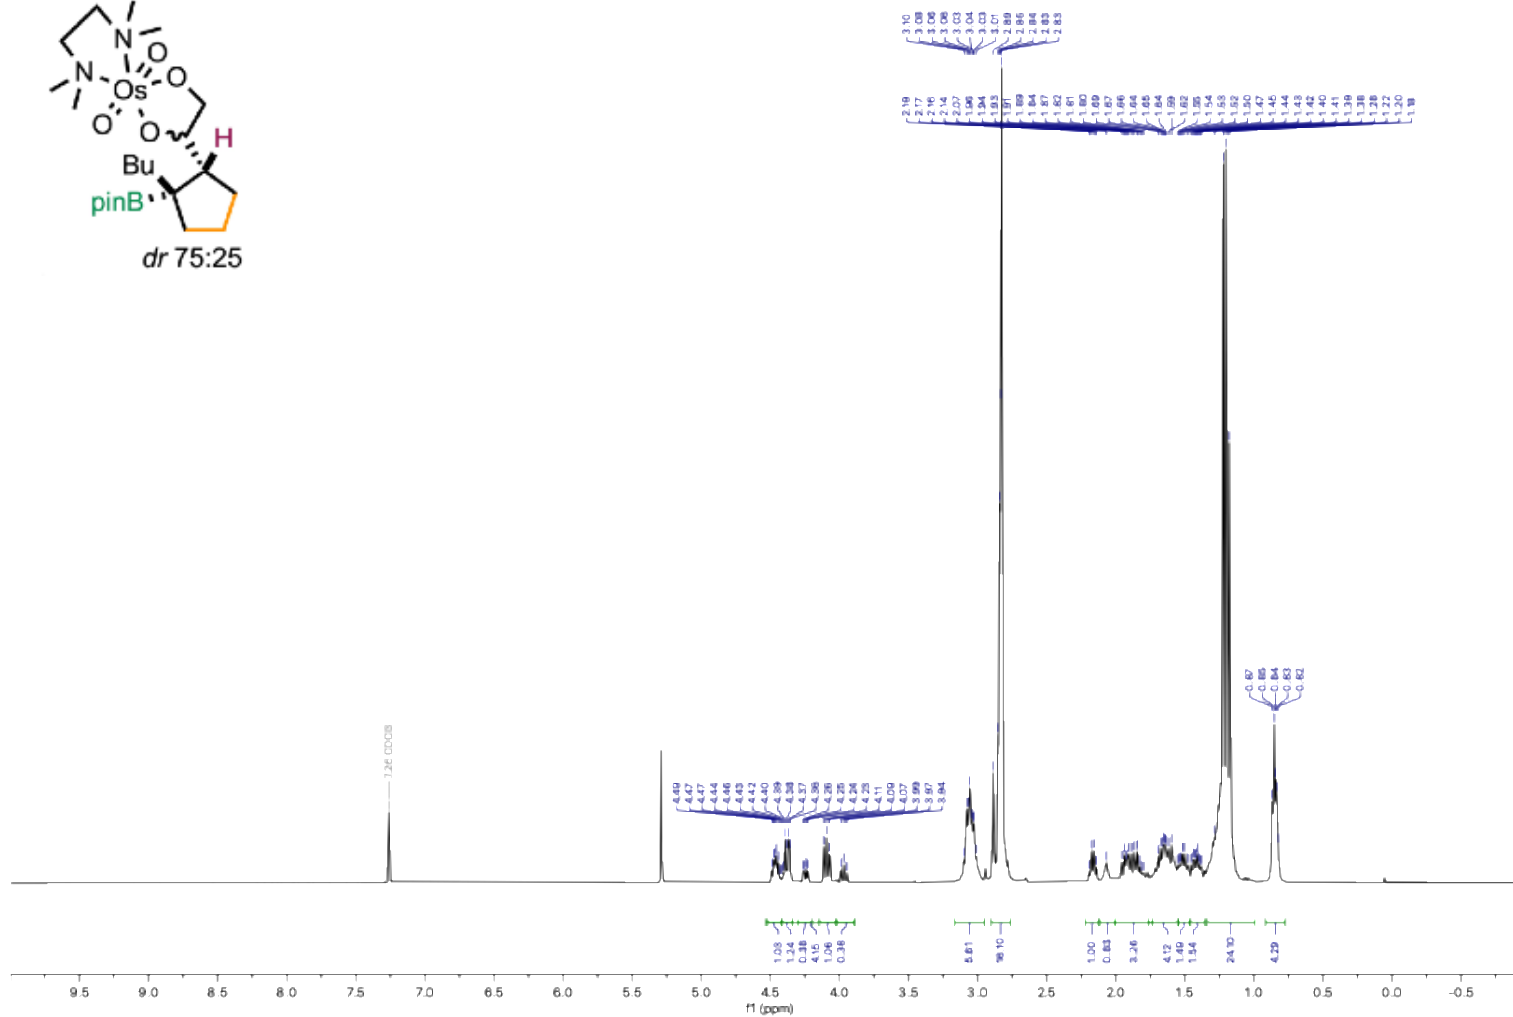

<sup>1</sup>H NMR spectrum (400 MHz, CDCl<sub>3</sub>)

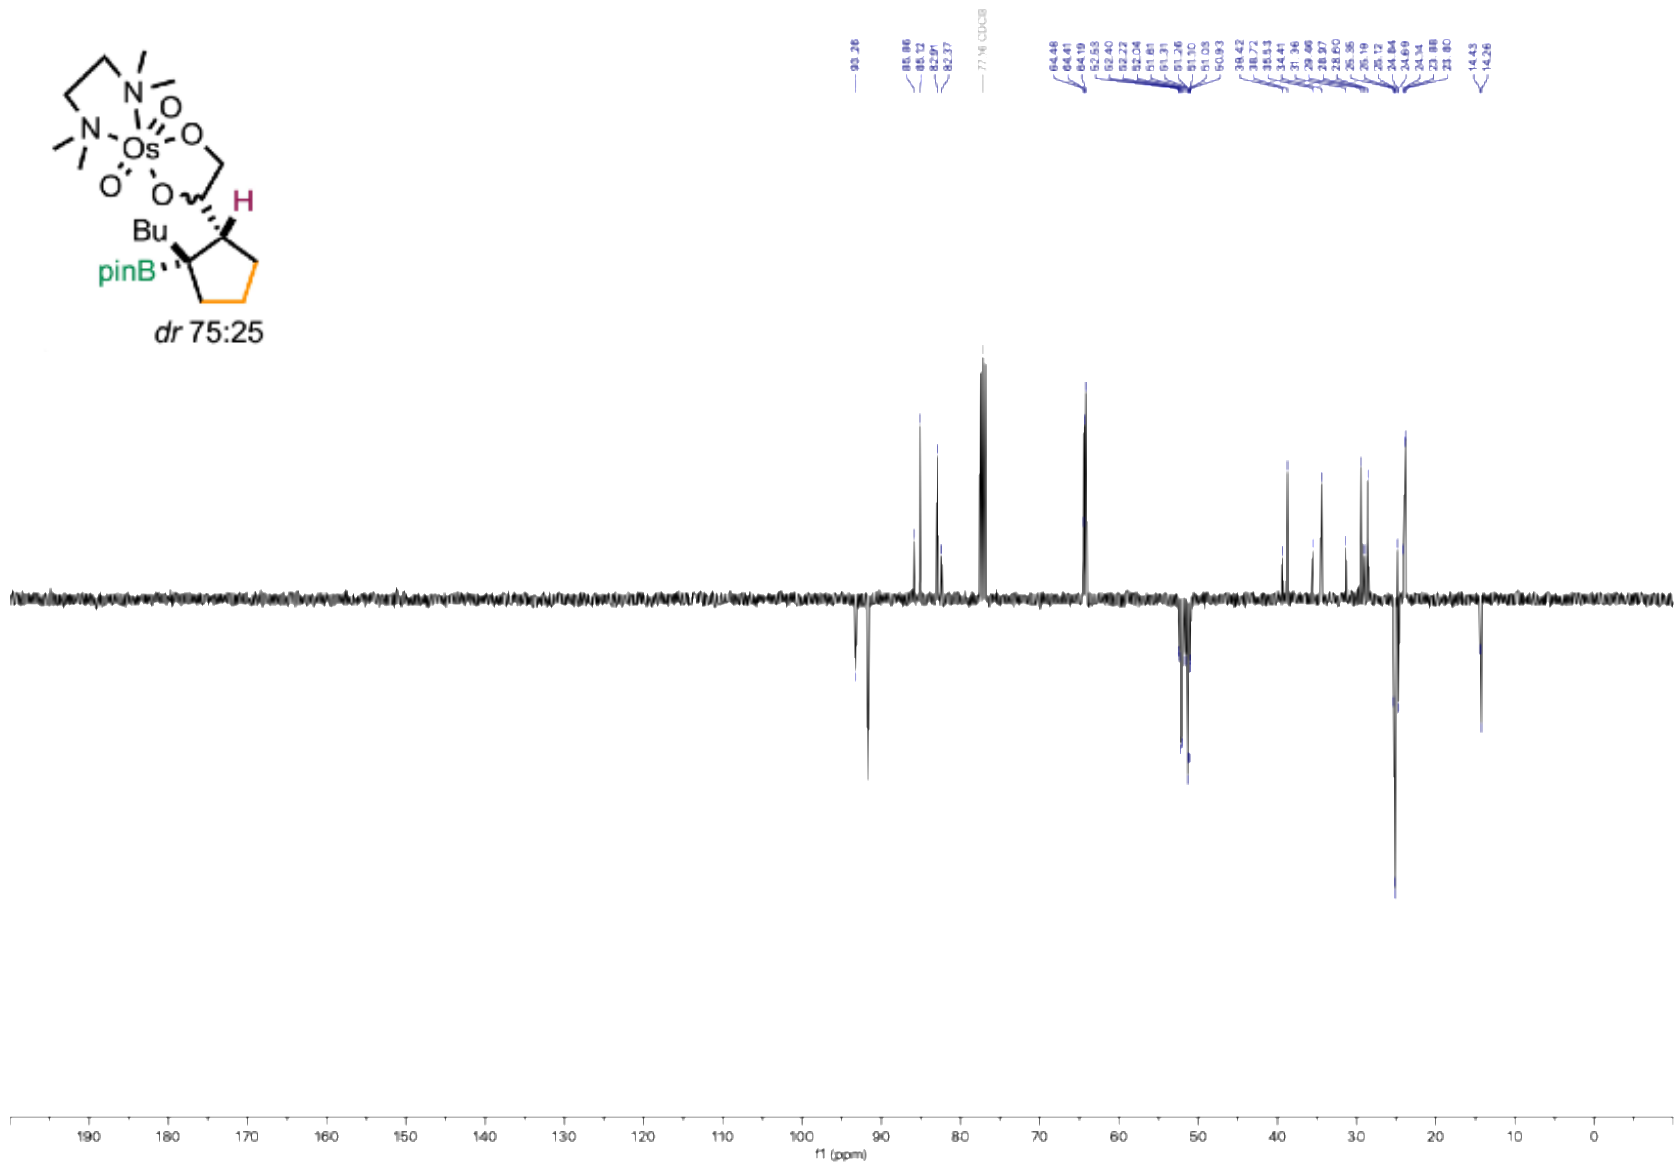

<sup>13</sup>C NMR spectrum (101 MHz, CDCl<sub>3</sub>)

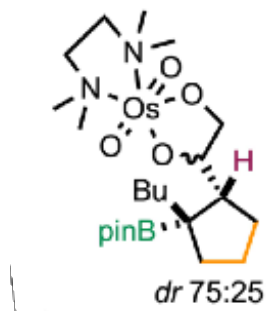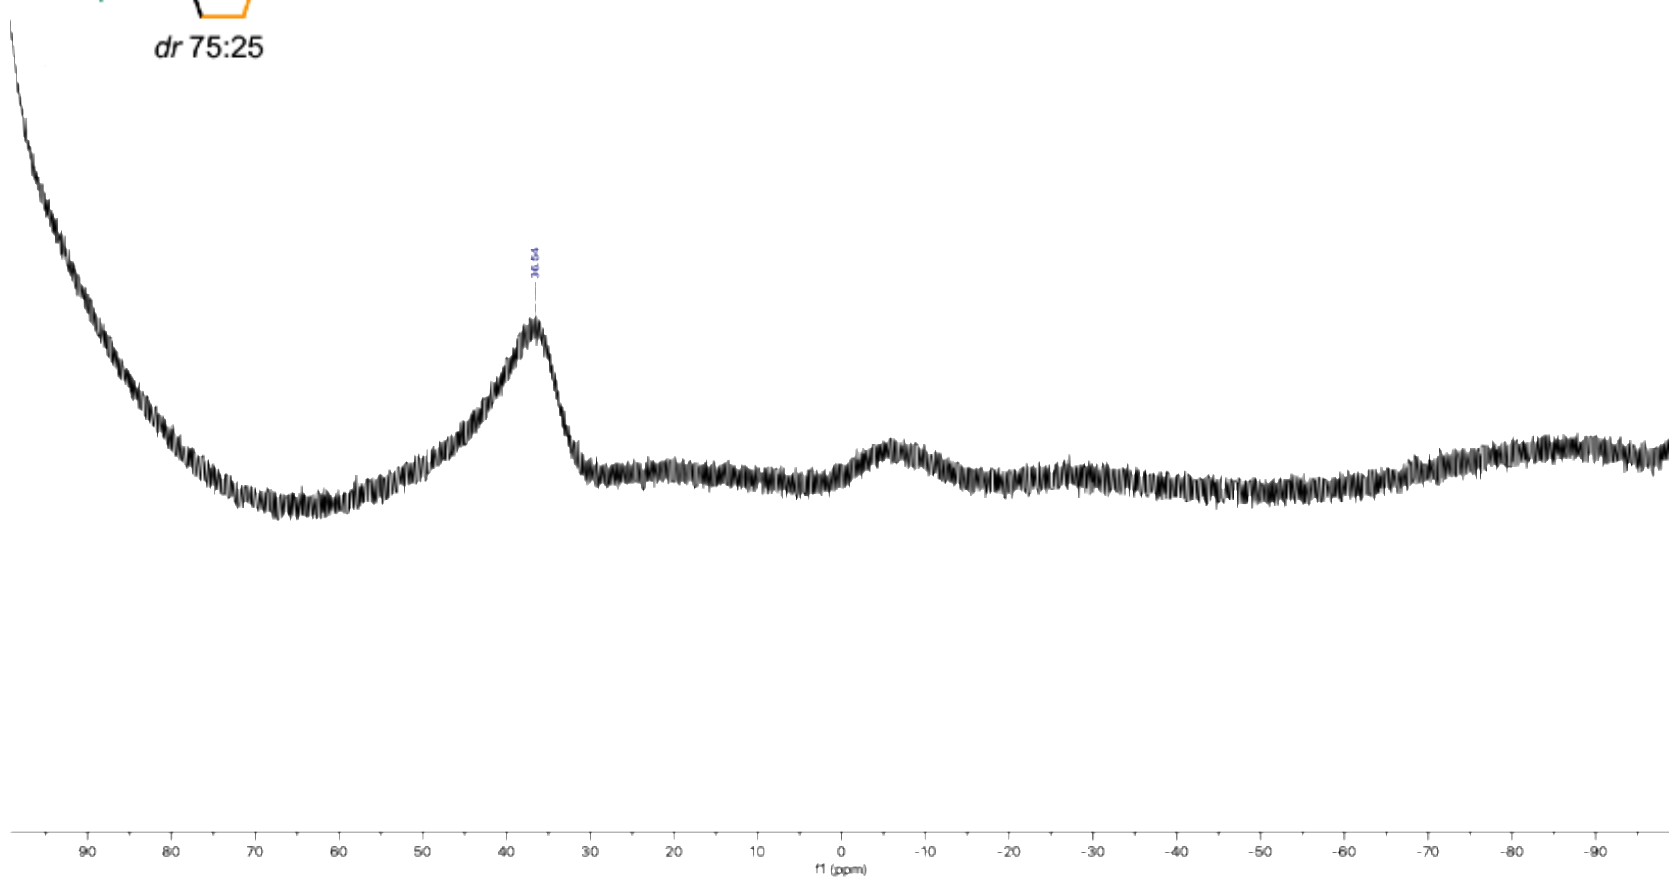

<sup>11</sup>B NMR spectrum (128 MHz, CDCl<sub>3</sub>)

---

## 6. References

- (1) Augustin, A. U.; Di Silvio, S.; Marek, I. *J. Am. Chem. Soc.* **2022**, *144* (36), 16298-16302.
- (2) Pavlíčková, T.; Stöckl, Y.; Marek, I. *Org. Lett.* **2022**, *24* (48), 8901-8906.
- (3) Pavlickova, T.; Orbach, N.; Kaushansky, A.; Marek, I. *J. Am. Chem. Soc.* **2025**, *147*, 41204-41209.
- (4) Burchat, A. F.; Chong, J. M.; Nielsen, N. *J. Organomet. Chem.* **1997**, *542* (2), 281-283.
- (5) Burns, A. S.; Dooley III, C.; Carlson, P. R.; Ziller, J. W.; Rychnovsky, S. D. *Org. Lett.* **2019**, *21*, 10125–10129.
- (6) Dolomanov, O. V.; Bourhis, L.J.; Gildea, R. J.; Howard, J. A. K.; Puschmann, H. *J. Appl. Cryst.* **2009**, *42*, 339-341.
- (7) Bourhis, L. J.; Dolomanov, O. V.; Gildea, R. J.; Howard, J. A. K.; Puschmann, H. *Acta Cryst.* **2015**, *A71*, 59-75.
- (8) Sheldrick, G.M. *Acta Cryst.* **2015**, *C71*, 3-8.
- (9) Mercury Software from CCDC: <http://www.ccdc.cam.ac.uk/Solutions/CSDSystem/Pages/Mercury.aspx>.
